# Supplementary material for: Resilient Health Systems Appraisal Model. Whole-of-system approach to health system resilience in fragile contexts: a best-fit framework synthesis
Source: Research Square preprint supplement (doi:10.21203/rs.3.rs-7269670/v1), 2025-08-13
Supplement: Supplementary file 1 [file 332440139451cffb8421c266.docx]

**Additional file 1**

Table 1 Scoping review search criteria

| Database | Search string |
| --- | --- |
| PubMed | (("Delivery of Health Care"[MeSH Terms] OR "delivery of health care, integrated"[MeSH Terms] OR "Health Planning"[MeSH Terms] OR "health system*"[Title/Abstract] OR "health care system*"[Title/Abstract] OR "healthcare system*"[Title/Abstract]) AND ("Performance"[Title/Abstract] OR "resilien*"[Title/Abstract]) AND ("Benchmarking"[MeSH Terms] OR "Disaster Planning"[MeSH Terms] OR "measur*"[Title/Abstract] OR "quantif*"[Title/Abstract] OR "framework*"[Title/Abstract] OR "analys*"[Title/Abstract] OR "evaluat*"[Title/Abstract] OR "monitor*"[Title/Abstract]) AND ("Developing Countries"[MeSH Terms] OR "Somalia"[Title/Abstract] OR "south sudan"[Title/Abstract] OR "Afghanistan"[Title/Abstract] OR "Yemen"[Title/Abstract] OR "central african republic"[Title/Abstract] OR "Congo"[Title/Abstract] OR "democratic republic of the congo"[Title/Abstract] OR "Chad"[Title/Abstract] OR "Syria"[Title/Abstract] OR "syrian arab republic"[Title/Abstract] OR "Burundi"[Title/Abstract] OR "Sudan"[Title/Abstract] OR "Eritrea"[Title/Abstract] OR "Niger"[Title/Abstract] OR "Mali"[Title/Abstract] OR "Liberia"[Title/Abstract] OR "Madagascar"[Title/Abstract] OR "Uganda"[Title/Abstract] OR "Mozambique"[Title/Abstract] OR "Guinea-Bissau"[Title/Abstract] OR "burkina faso"[Title/Abstract] OR "Ethiopia"[Title/Abstract] OR "sierra leone"[Title/Abstract] OR "Togo"[Title/Abstract] OR "democratic people s republic of korea"[Title/Abstract] OR "Gambia"[Title/Abstract])) AND (2014:2024[pdat]) |
| EMBASE | (((('health system' OR 'health$care planning' OR 'health system*') NEAR/2 (resilien* OR performance)):ab,ti,kw) OR (('health care'/mj OR 'health systems'/exp OR 'health care system'/exp OR 'health care planning'/mj) AND (resilien*:ab,ti,kw OR performance:ab,ti,kw))) AND (measur*:ab,ti,kw OR quantif*:ab,ti,kw OR framework*:ab,ti,kw OR analys*:ab,ti,kw OR evaluat*:ab,ti,kw OR monitor*:ab,ti,kw) AND ('developing country'/mj OR 'low income country'/exp OR somalia:ab,ti,kw OR afghanistan:ab,ti,kw OR yemen:ab,ti,kw OR 'central african':ab,ti,kw OR congo:ab,ti,kw OR chad:ab,ti,kw OR tchad:ab,ti,kw OR syria:ab,ti,kw OR 'syrian arab republic':ab,ti,kw OR burundi:ab,ti,kw OR sudan:ab,ti,kw OR eritrea:ab,ti,kw OR niger:ab,ti,kw OR mali:ab,ti,kw OR liberia:ab,ti,kw OR madagascar:ab,ti,kw OR uganda:ab,ti,kw OR mozambique:ab,ti,kw OR 'guinea bissau':ab,ti,kw OR 'burkina faso':ab,ti,kw OR ethiopia:ab,ti,kw OR 'sierra leone':ab,ti,kw OR togo:ab,ti,kw OR korea:ab,ti,kw OR gambia:ab,ti,kw) |
| WoS | (("health system*" OR "health$care planning") NEAR/2 (resilien* OR performance)) AND (measur* OR quantif* OR framework* OR analys* OR evaluat* OR monitor*) AND (developing NEAR/0 countr* OR low NEAR/0 income NEAR/0 countr* OR somalia OR afghanistan OR yemen OR central NEAR/0 africa* OR congo OR chad OR Tchad OR syria OR "Syrian Arab Republic" OR burundi OR sudan OR eritrea OR niger OR mali OR liberia OR madagascar OR uganda OR mozambique OR "guinea bissau" OR "burkina faso" OR ethiopia OR "sierra leone" OR togo OR korea OR gambia) |

**Scoping review Quality Assessment**

1. Q1: Was the research question or objective in this paper clearly stated? (NIH Ob Q1. Was the research question or objective in this paper clearly stated?)
2. Q2: Was the research design appropriate to address the aims of the research? (CASP Qual Q3. Was the research design appropriate to address the aims of the research?)
3. Q3: Do the collected data allow to address the research questions? (MMAT Screening Q2.)
4. Q4: Are the data sources clearly specified and referenced? Minimum quality criteria used in Basu et al. 2010
5. Q5: Were the study subjects and the setting described in detail? (JBI Cross Sect Q2. Were the study subjects and the setting described in detail?)
6. Q6: Were the outcomes defined in detail? (NIH Before After Studies Q7. Were the outcome measures prespecified, clearly defined, valid, reliable, and assessed consistently across all study participants?)
7. Q7: Is there a clear statement/presentation of findings? (CASP Q9. 9. Is there a clear statement of findings?)

Sources (a) NIH Quality Assessment of Systematic Reviews and Meta-Analyses https://www.nhlbi.nih.gov/health-topics/study-quality-assessment-tools (b) CASP Checklist for Qualitative Research https://view.officeapps.live.com/op/view.aspx?src=https%3A%2F%2Fcasp-uk.net%2Fcasp-checklists%2FCASP-checklist-qualitative-2024.docx&wdOrigin=BROWSELINK (C) Mixed Methods Appraisal Tool (MMAT), version 2018

| Covidence # | Study ID | Title | Q1: | Q1 | Q2: | Q2 | Q3: | Q3: | Q4: | Q4 | Q5: | Q5: | Q6: | Q6 | Q7 | Q7 | Score (sumQ1:Q7)/7 |
| --- | --- | --- | --- | --- | --- | --- | --- | --- | --- | --- | --- | --- | --- | --- | --- | --- | --- |
| 2020 | Zhao 2023 | Evaluation of health system resilience in 60 countries based on their responses to COVID-19 | Yes | **1** | Yes | **1** | Yes | **1** | Yes | **1** | Yes | **1** | Yes | **1** | Yes | **1** | **100%** |
| 2018 | Meyer 2020 | A checklist to improve health system resilience to infectious disease outbreaks and natural hazards | Yes | **1** | Yes | **1** | Yes | **1** | Yes | **1** | Yes | **1** | Yes | **1** | Yes | **1** | **100%** |
| 1790 | Veillard 2017 | Better Measurement for Performance Improvement in Low- and Middle-Income Countries: The Primary Health Care Performance Initiative (PHCPI) Experience of Conceptual Framework Development and Indicator Selection | Unclear | **0** | Yes | **1** | Yes | **1** | Yes | **1** | Yes | **1** | Yes | **1** | Yes | **1** | **86%** |
| 1617 | AlWaziza 2023 | Analyzing Yemen's health system at the governorate level amid the ongoing conflict: a case of Al Hodeida governorate | Yes | **1** | No | **0** | No | **0** | Yes | **1** | Yes | **1** | Yes | **1** | Yes | **1** | **71%** |
| 1425 | Lerosier 2023 | Minimal resilience and insurgent conflict: qualitative analysis of the resilience process in six primary health centres in central Mali | Yes | **1** | No | **1** | Unclear | **0** | Yes | **1** | Yes | **1** | Unclear | **0** | Yes | **1** | **71%** |
| 1044 | Ling 2017 | Beyond the crisis: did the Ebola epidemic improve resilience of Liberia's health system? | Yes | **1** | Yes | **1** | Yes | **1** | Yes | **1** | Yes | **1** | Yes | **1** | Yes | **1** | **100%** |
| 1041 | Hanefeld 2018 | Towards an understanding of resilience: responding to health systems shocks | Yes | **1** | Yes | **1** | Yes | **1** | No | **0** | Yes | **1** | Yes | **1** | Yes | **1** | **86%** |
| 1036 | Jamal 2020 | Health system resilience in the face of crisis: analysing the challenges, strategies and capacities for UNRWA in Syria | Yes | **1** | Yes | **1** | Yes | **1** | Yes | **1** | Yes | **1** | Yes | **1** | Yes | **1** | **100%** |
| 1019 | Karamagi 2022 | On the resilience of health systems: A methodological exploration across countries in the WHO African Region | Yes | **1** | Yes | **1** | Yes | **1** | Yes | **1** | Yes | **1** | Yes | **1** | Yes | **1** | **100%** |
| 907 | Ako-Egbe 2023 | Liberia health system's journey to long-term recovery and resilience post-Ebola: a case study of an exemplary multi-year collaboration | Yes | **1** | Yes | **1** | Yes | **1** | Yes | **1** | Yes | **1** | Yes | **1** | Yes | **1** | **100%** |
| 877 | Arsenault 2022 | COVID-19 and resilience of healthcare systems in ten countries | Yes | **1** | Yes | **1** | Yes | **1** | Yes | **1** | Yes | **1** | Yes | **1** | Yes | **1** | **100%** |
| 855 | Basij-Rasikh 2024 | Primary healthcare system and provider responses to the Taliban takeover in Afghanistan | Unclear | **1** | No | **1** | No | **0** | Yes | **1** | Yes | **1** | No | **0** | Yes | **1** | **71%** |
| 555 | Karamagi 2021 | Towards universal health coverage in the WHO African Region: assessing health system functionality, incorporating lessons from COVID-19 | Yes | **1** | Yes | **1** | Yes | **1** | Yes | **1** | Yes | **1** | Yes | **1** | Yes | **1** | **100%** |
