# Supplementary material for: Resilient Health Systems Appraisal Model. Whole-of-system approach to health system resilience in fragile contexts: a best-fit framework synthesis
Source: Research Square preprint supplement (doi:10.21203/rs.3.rs-7269670/v1), 2025-08-13
Supplement: Supplementary file 2 [file 638ed9778d286d8b2176bd1b.xlsx]

## Sheet: Sheet1
Building Block	Indicator	Domain	Subdomain	The framework	Article or document
Health information systems	Health officials currently have mechanisms for ongoing analysis of case reports reported by facilities	3.2. Data Driven Decision Making	3.2.1 Data-Driven Decision Making	3.2.1.1.Data informs allocation of financial resources , multi-year planning and forecasting at the national and subnational levels	A checklist to improve health system resilience to infectious disease outbreaks and natural hazards
Health information systems	Appropriate internet access	3.1. Health information system governance and management	3.1.1. National Health Information system	3.1.1.1. National Health information system meets criteria, functional and responsive to health sector needs	Using the World Health Organization health system building blocks through survey of healthcare professionals to determine the performance of public healthcare facilities
Health information systems	Up-to-date and appropriate guidelines and protocols	3.1. Health information system governance and management	3.1.1. National Health Information system	3.1.1.1. National Health information system meets criteria, functional and responsive to health sector needs	Using the World Health Organization health system building blocks through survey of healthcare professionals to determine the performance of public healthcare facilities
Health information systems	Monitoring and evaluation	3.1. Health information system governance and management	3.1.1. National Health Information system	3.1.1.1. National Health information system meets criteria, functional and responsive to health sector needs	Using the World Health Organization health system building blocks through survey of healthcare professionals to determine the performance of public healthcare facilities
Health information systems	Influenza surveillance is established (IHR)	3.1. Health information system governance and management	3.1.2. Surveillance	3.1.2.2. Surveillance	On the resilience of health systems: A methodological exploration across countries in the WHO African Region
Health information systems	able to evaluate own performance and uses this to improve (adaptive)	3.2. Data Driven Decision Making	3.2.1 Data-Driven Decision Making	3.2.1.1.Data informs allocation of financial resources , multi-year planning and forecasting at the national and subnational levels	Beyond the crisis: did the Ebola epidemic improve resilience of Liberia’s health system?
Health information systems	Indicator based, surveillance includes an early warning function for the early detection of a public health event (IHR)	3.1. Health information system governance and management	3.1.2. Surveillance	3.1.2.2. Surveillance	On the resilience of health systems: A methodological exploration across countries in the WHO African Region
Health information systems	There is regularly updated information on the state and performance of the health system (transformation)	3.2. Data Driven Decision Making	3.2.1 Data-Driven Decision Making	3.2.1.1.Data informs allocation of financial resources , multi-year planning and forecasting at the national and subnational levels	On the resilience of health systems: A methodological exploration across countries in the WHO African Region
Health information systems	The health sector is conducting simulation exercises (stress tests) against the 5 shock events of highest risk of occurrence (Awareness)	3.2. Data Driven Decision Making	3.2.1 Data-Driven Decision Making	3.2.1.1.Data informs allocation of financial resources , multi-year planning and forecasting at the national and subnational levels	On the resilience of health systems: A methodological exploration across countries in the WHO African Region
Health information systems	The health sector is conducting regular (at least annual) predictive modelling of major health risks facing different populations and sharing this information with concerned parties (Awareness)	3.2. Data Driven Decision Making	3.2.1 Data-Driven Decision Making	3.2.1.1.Data informs allocation of financial resources , multi-year planning and forecasting at the national and subnational levels	On the resilience of health systems: A methodological exploration across countries in the WHO African Region
Health information systems	There is a functional epidemiological surveillance network regularly (weekly) reporting on status of potential disease events (Awareness)	3.1. Health information system governance and management	3.1.2. Surveillance	3.1.2.2. Surveillance	On the resilience of health systems: A methodological exploration across countries in the WHO African Region
Health information systems	There is an up to date (under 1 year old) mapping of potential health risks at the lowest level of the health system – health center or community unit (Awareness)	3.2. Data Driven Decision Making	3.2.1 Data-Driven Decision Making	3.2.1.1.Data informs allocation of financial resources , multi-year planning and forecasting at the national and subnational levels	On the resilience of health systems: A methodological exploration across countries in the WHO African Region
Leadership and governance	There is up to date (under 1 year old) data mapping the health system assets – HR, infrastructure, commodities – that can be mobilized in the event of a stress event (Awareness)	1.1. Vision and strategic direction	1.1.2. Policies and Guidance Documents	1.1.2.1. Policies and guidelines cover all strategic priority areas	On the resilience of health systems: A methodological exploration across countries in the WHO African Region
Health information systems	There is regularly updated information on the level of functionality of the health system	3.2. Data Driven Decision Making	3.2.1 Data-Driven Decision Making	3.2.1.1.Data informs allocation of financial resources , multi-year planning and forecasting at the national and subnational levels	Towards universal health coverage in the WHO African Region: assessing health system functionality, incorporating lessons from COVID-19
Service delivery	Maternal mortality ratio (per 100 000 births)	6.1. Governance and Management	6.1.1. Service delivery planning employs balanced service delivery	6.1.1.1. Service delivery planning is data-informed, employs balanced service delivery, and ensures continuity of services during emergencies	Health system functionality in a low-income country in the midst of conflict: the case of Yemen
Health information systems	There are protocols to constantly monitor essential service provision during a shock event exist	3.2. Data Driven Decision Making	3.2.1 Data-Driven Decision Making	3.2.1.1.Data informs allocation of financial resources , multi-year planning and forecasting at the national and subnational levels	Towards universal health coverage in the WHO African Region: assessing health system functionality, incorporating lessons from COVID-19
Health information systems	Process documentation and intelligence generation is planned for shock events, and a repository of such lessons exists	3.2. Data Driven Decision Making	3.2.1 Data-Driven Decision Making	3.2.1.1.Data informs allocation of financial resources , multi-year planning and forecasting at the national and subnational levels	Towards universal health coverage in the WHO African Region: assessing health system functionality, incorporating lessons from COVID-19
Health information systems	Indicator based, surveillance includes an early warning function for the early detection of a public health event	3.1. Health information system governance and management	3.1.2. Surveillance	3.1.2.2. Surveillance	Towards universal health coverage in the WHO African Region: assessing health system functionality, incorporating lessons from COVID-19
Health information systems	Event based surveillance is established	3.1. Health information system governance and management	3.1.2. Surveillance	3.1.2.2. Surveillance	Towards universal health coverage in the WHO African Region: assessing health system functionality, incorporating lessons from COVID-19
Health information systems	Influenza surveillance is established	3.1. Health information system governance and management	3.1.2. Surveillance	3.1.2.2. Surveillance	Towards universal health coverage in the WHO African Region: assessing health system functionality, incorporating lessons from COVID-19
Health information systems	The country's ability to produce high-quality statistics that meet the needs of the country and its citizens	3.1. Health information system governance and management	3.1.2. Data Quality	3.1.2.1. Data quality is consistently monitored through a national mechanism that ensurs accuracy, reliability, and consistency of reported health data.	Evaluation of health system resilience in 60 countries based on their responses to COVID-19
Health information systems	Monitoring and testing the scope of monitoring and detection, the efficiency of monitoring and detection, the diversity of technologies, and the complexity of each government region	3.1. Health information system governance and management	3.1.2. Surveillance	3.1.2.2. Surveillance	Evaluation of health system resilience in 60 countries based on their responses to COVID-19
Health information systems	Key statistics routinely collected	3.1. Health information system governance and management	3.1.3. Core Health Indicators	3.1.3.1. The country has core health indicators that are regularly updated and used to assess system resilience and performance at national and subnational Levels	Health system functionality in a low-income country in the midst of conflict: the case of Yemen
Health information systems	Health Management Information System	3.1. Health information system governance and management	3.1.1. National Health Information system	3.1.1.1. National Health information system meets criteria, functional and responsive to health sector needs	Health system functionality in a low-income country in the midst of conflict: the case of Yemen
Health information systems	Disease Early Warning System	3.1. Health information system governance and management	3.1.2. Surveillance	3.1.2.2. Surveillance	Health system functionality in a low-income country in the midst of conflict: the case of Yemen
Health information systems	Monitoring and evaluation mechanism established for measuring the resilience of health services to PHE as part of routine health information system	3.1. Health information system governance and management	3.1.3. Core Health Indicators	3.1.3.1. The country has core health indicators that are regularly updated and used to assess system resilience and performance at national and subnational Levels	Liberia health system’s journey to long-term recovery and resilience post-Ebola: a case study of an exemplary multi-year collaboration
Health information systems	Easy and time-efficient reporting system	3.1. Health information system governance and management	3.1.2. Data Quality	3.1.2.1. Data quality is consistently monitored through a national mechanism that ensurs accuracy, reliability, and consistency of reported health data.	Using the World Health Organization health system building blocks through survey of healthcare professionals to determine the performance of public healthcare facilities
Health information systems	Event based surveillance is established (IHR)	3.1. Health information system governance and management	3.1.2. Data Quality	3.1.2.2. Surveillance	On the resilience of health systems: A methodological exploration across countries in the WHO African Region
Health information systems	Health officials currently support research on healthcare system strengthening and quality improvement	3.2. Data Driven Decision Making	3.2.1 Data-Driven Decision Making	3.2.1.1.Data informs allocation of financial resources , multi-year planning and forecasting at the national and subnational levels	A checklist to improve health system resilience to infectious disease outbreaks and natural hazards
Health information systems	Having (or establishing) well-functioning communication channels linked to lines of accountability, including hard and soft infrastructure	3.1. Health information system governance and management	3.1.1. National Health Information system	3.1.1.1. National Health information system meets criteria, functional and responsive to health sector needs	Resilience of primary healthcare system across low- and middle-income countries during COVID-19 pandemic: a scoping review
Health information systems	Evidence of timely data generation	3.1. Health information system governance and management	3.1.2. Data Quality	3.1.2.1. Data quality is consistently monitored through a national mechanism that ensurs accuracy, reliability, and consistency of reported health data.	Resilience of primary healthcare system across low- and middle-income countries during COVID-19 pandemic: a scoping review
Health information systems	Evidence of active and/or passive surveillance system	3.1. Health information system governance and management	3.1.2. Surveillance	3.1.2.2. Surveillance	Resilience of primary healthcare system across low- and middle-income countries during COVID-19 pandemic: a scoping review
Health information systems	Health officials currently conduct assessments of vulnerabilities to natural hazards and provides that information to relevant health facilities.	3.2. Data Driven Decision Making	3.2.1 Data-Driven Decision Making	3.2.1.1.Data informs allocation of financial resources , multi-year planning and forecasting at the national and subnational levels	A checklist to improve health system resilience to infectious disease outbreaks and natural hazards
Health system financing	Funding is available and accessible for implementing IHR NFP functions and IHR core capacity strengthening (IHR)	5.3. Capacity of Public Institutions	5.3.2. Funding to respond to shocks and emergencies	5.3.2.1. Domestic financing for responding to emergencies is in place and allows for timely response	On the resilience of health systems: A methodological exploration across countries in the WHO African Region
Leadership and governance	There is guidance on comprehensive recovery planning based on assessment, and investment across the health system	1.1. Vision and strategic direction	1.1.2. Policies and Guidance Documents	1.1.2.1. Policies and guidelines cover all strategic priority areas	Towards universal health coverage in the WHO African Region: assessing health system functionality, incorporating lessons from COVID-19
Leadership and governance	There is guidance on comprehensive recovery planning based on assessment, and investment across the health system (Transformation)	1.1. Vision and strategic direction	1.1.2. Policies and Guidance Documents	1.1.2.1. Policies and guidelines cover all strategic priority areas	On the resilience of health systems: A methodological exploration across countries in the WHO African Region
Service delivery	Under-5 mortality (per 100 000)	6.1. Governance and Management	6.1.1. Service delivery planning employs balanced service delivery	6.1.1.1. Service delivery planning is data-informed, employs balanced service delivery, and ensures continuity of services during emergencies	Health system functionality in a low-income country in the midst of conflict: the case of Yemen
Service delivery	Stillbirth rate (per 1000 total births)	6.1. Governance and Management	6.1.1. Service delivery planning employs balanced service delivery	6.1.1.1. Service delivery planning is data-informed, employs balanced service delivery, and ensures continuity of services during emergencies	Towards universal health coverage in the WHO African Region: assessing health system functionality, incorporating lessons from COVID-19
Health system financing	Total expenditure on health as percentage of GDP	5.1. Governance Revenue raising and Pooling	5.1.2. Revenue Raising	5.1.2.1 Reliable funding sources throughout the duration of the current planning cycle	Health system functionality in a low-income country in the midst of conflict: the case of Yemen
Health system financing	Linkage of financial mobilization with evidence-based plan	5.1. Governance Revenue raising and Pooling	5.1.3. Pooling revenues	5.1.3.1 Effective structure and mechanisms for the equitable pooling of revenues, efficient redistribution of funds from regions or groups with lower needs to those with higher needs and integration across all health programs and funding schemes	Using the World Health Organization health system building blocks through survey of healthcare professionals to determine the performance of public healthcare facilities
Health system financing	can maintain provision of essential services in crisis (self regulating)	5.3. Capacity of Public Institutions	5.3.2. Funding to respond to shocks and emergencies	5.3.2.1. Domestic financing for responding to emergencies is in place and allows for timely response	Beyond the crisis: did the Ebola epidemic improve resilience of Liberia’s health system?
Health system financing	Ensuring sufficient monetary resources in the system and flexibility to reallocate and inject extra funds into the system	5.3. Capacity of Public Institutions	5.3.2. Funding to respond to shocks and emergencies	5.3.2.1. Domestic financing for responding to emergencies is in place and allows for timely response	Resilience of primary healthcare system across low- and middle-income countries during COVID-19 pandemic: a scoping review
Health system financing	Ensuring the financing arrangement prioritizes the provision of essential PHC services	5.2. Purcahsing access and Financial Protection	5.2.1. Purchasing, providers payments and conditions of access	5.2.1.1. Resource allocation to providers reflects population health needs, provider performance and tailored in support of service delivery objectives.	Resilience of primary healthcare system across low- and middle-income countries during COVID-19 pandemic: a scoping review
Health system financing	Any evidence of a disaster risk financing mechanism	5.3. Capacity of Public Institutions	5.3.2. Funding to respond to shocks and emergencies	5.3.2.1. Domestic financing for responding to emergencies is in place and allows for timely response	Resilience of primary healthcare system across low- and middle-income countries during COVID-19 pandemic: a scoping review
Health system financing	Ability to quickly adapt procurement and payment systems while maintaining transparency, timeliness, and quality, including measures to prevent corruption	5.1. Governance Revenue raising and Pooling	5.1.1. Health financing policy and decision making	5.1.1.1. Health financing policies are guided by UHC goals and high-quality health financing data are systematically used to inform decision making	Resilience of primary healthcare system across low- and middle-income countries during COVID-19 pandemic: a scoping review
Health system financing	Efficient and effective Healthcare financing system	5.3. Capacity of Public Institutions	5.3.1. Public Financial Management (PFM) System	5.3.1.1. Health budget formulation enables flexible spending that aligns with sector priorities, and ensures that public funds are directed toward priority populations, essential interventions, and providers payments are structured to reward outputs and performance	Using the World Health Organization health system building blocks through survey of healthcare professionals to determine the performance of public healthcare facilities
Health system financing	Percent of facilities that did not report moderate to severe challenges with financing during the pandemic	5.3. Capacity of Public Institutions	5.3.2. Funding to respond to shocks and emergencies	5.3.2.1. Domestic financing for responding to emergencies is in place and allows for timely response	Resilience of front-line facilities during COVID-19: evidence from cross-sectional rapid surveys in eight low- and middle-income countries
Health system financing	Health officials currently provide facilities with guidelines for how to allocate scare resources during an emergency	5.3. Capacity of Public Institutions	5.3.2. Funding to respond to shocks and emergencies	5.3.2.1. Domestic financing for responding to emergencies is in place and allows for timely response	A checklist to improve health system resilience to infectious disease outbreaks and natural hazards
Health system financing	Health officials currently have plans for authorizing and distributing emergency funding to health facilities	5.3. Capacity of Public Institutions	5.3.2. Funding to respond to shocks and emergencies	5.3.2.1. Domestic financing for responding to emergencies is in place and allows for timely response	A checklist to improve health system resilience to infectious disease outbreaks and natural hazards
Health system financing	Health officials have established an emergency fund that can be quickly accessed during emergencies	5.3. Capacity of Public Institutions	5.3.2. Funding to respond to shocks and emergencies	5.3.2.1. Domestic financing for responding to emergencies is in place and allows for timely response	A checklist to improve health system resilience to infectious disease outbreaks and natural hazards
Health system financing	Out-of-pocket expenditure on health as percentage of total health expenditure	5.2. Purcahsing access and Financial Protection	5.2.2.Financial Protection	5.2.2.2. Out-of-pocket health expenditures are minimized, effective fee exemptions are in place, and informal fees are eliminated to promote equitable access to healthcare	Health system functionality in a low-income country in the midst of conflict: the case of Yemen
Health system financing	General Government expenditure on health as percentage of total Government expenditure	5.1. Governance Revenue raising and Pooling	5.1.2. Revenue Raising	5.1.2.1 Reliable funding sources throughout the duration of the current planning cycle	Health system functionality in a low-income country in the midst of conflict: the case of Yemen
Health system financing	External resources for health as percentage of expend	5.1. Governance Revenue raising and Pooling	5.1.2. Revenue Raising	5.1.2.1 Reliable funding sources throughout the duration of the current planning cycle	Health system functionality in a low-income country in the midst of conflict: the case of Yemen
Health system financing	There are pre-agreed mechanisms for sharing of personnel, funds and capacities amongst stakeholders working within their areas of responsibility of facilities	5.1. Governance Revenue raising and Pooling	5.1.1. Health financing policy and decision making	5.1.1.1. Health financing policies are guided by UHC goals and high-quality health financing data are systematically used to inform decision making	Towards universal health coverage in the WHO African Region: assessing health system functionality, incorporating lessons from COVID-19
Health system financing	Incidence of catastrophic expenditure (%): at 10% of household total consumption or income	5.2. Purcahsing access and Financial Protection	5.2.2.Financial Protection	5.2.2.2. Out-of-pocket health expenditures are minimized, effective fee exemptions are in place, and informal fees are eliminated to promote equitable access to healthcare	Towards universal health coverage in the WHO African Region: assessing health system functionality, incorporating lessons from COVID-19
Health system financing	Effective budget consumption	5.3. Capacity of Public Institutions	5.3.1. Public Financial Management (PFM) System	5.3.1.1. Health budget formulation enables flexible spending that aligns with sector priorities, and ensures that public funds are directed toward priority populations, essential interventions, and providers payments are structured to reward outputs and performance	Using the World Health Organization health system building blocks through survey of healthcare professionals to determine the performance of public healthcare facilities
Health system financing	The number of people covered by health insurance in each country as a percentage of the total number of all nationals	5.2. Purcahsing access and Financial Protection	5.2.2.Financial Protection	5.2.2.1. Population covered by health insurance that ensures access to essential health services without financial hardship	Evaluation of health system resilience in 60 countries based on their responses to COVID-19
Health system financing	The amount of money consumed by a country (or region) for health care services in a given period of time	5.1. Governance Revenue raising and Pooling	5.1.2. Revenue Raising	5.1.2.1 Reliable funding sources throughout the duration of the current planning cycle	Evaluation of health system resilience in 60 countries based on their responses to COVID-19
Health system financing	Health officials currently have plans (and have disseminated these plans) for receiving donor resources during emergencies	5.3. Capacity of Public Institutions	5.3.2. Funding to respond to shocks and emergencies	5.3.2.1. Domestic financing for responding to emergencies is in place and allows for timely response	A checklist to improve health system resilience to infectious disease outbreaks and natural hazards
Health system financing	Health officials have established mechanisms to eliminate financial barriers to healthcare	5.2. Purcahsing access and Financial Protection	5.2.1. Purchasing, providers payments and conditions of access	5.2.1.2. Entitlements to health benefits are explicitly defined, universal in nature, and ensures access to population in need	A checklist to improve health system resilience to infectious disease outbreaks and natural hazards
Health system financing	Out-of-pocket expenditure (% of current health expenditure)	5.2. Purcahsing access and Financial Protection	5.2.2.Financial Protection	5.2.2.2. Out-of-pocket health expenditures are minimized, effective fee exemptions are in place, and informal fees are eliminated to promote equitable access to healthcare	Towards universal health coverage in the WHO African Region: assessing health system functionality, incorporating lessons from COVID-19
Health system financing	Out-of-pocket expenditure per capita, purchasing Power Parity (PPP) (current international $)	5.2. Purcahsing access and Financial Protection	5.2.2.Financial Protection	5.2.2.2. Out-of-pocket health expenditures are minimized, effective fee exemptions are in place, and informal fees are eliminated to promote equitable access to healthcare	Towards universal health coverage in the WHO African Region: assessing health system functionality, incorporating lessons from COVID-19
Health system financing	Domestic general government health expenditure (% of general government expenditure)	5.1. Governance Revenue raising and Pooling	5.1.2. Revenue Raising	5.1.2.1 Reliable funding sources throughout the duration of the current planning cycle	Towards universal health coverage in the WHO African Region: assessing health system functionality, incorporating lessons from COVID-19
Health system financing	Domestic general government health expenditure (% of current health expenditure)	5.1. Governance Revenue raising and Pooling	5.1.2. Revenue Raising	5.1.2.1 Reliable funding sources throughout the duration of the current planning cycle	Towards universal health coverage in the WHO African Region: assessing health system functionality, incorporating lessons from COVID-19
Health system financing	the amount of money consumed by the population for healthcare products and service	5.2. Purcahsing access and Financial Protection	5.2.2.Financial Protection	5.2.2.2. Out-of-pocket health expenditures are minimized, effective fee exemptions are in place, and informal fees are eliminated to promote equitable access to healthcare	Evaluation of health system resilience in 60 countries based on their responses to COVID-19
Health system financing	The required financial resources to ensure sustainability	5.1. Governance Revenue raising and Pooling	5.1.1. Health financing policy and decision making	5.1.1.1. Health financing policies are guided by UHC goals and high-quality health financing data are systematically used to inform decision making	Using the World Health Organization health system building blocks through survey of healthcare professionals to determine the performance of public healthcare facilities
Health system financing	General Government expenditure on health as percentage of total expenditure on health	5.1. Governance Revenue raising and Pooling	5.1.2. Revenue Raising	5.1.2.1 Reliable funding sources throughout the duration of the current planning cycle	Health system functionality in a low-income country in the midst of conflict: the case of Yemen
Health system financing	Public sector tax revenue (percentage of gross domestic product [GDP])	5.1. Governance Revenue raising and Pooling	5.1.2. Revenue Raising	5.1.2.1 Reliable funding sources throughout the duration of the current planning cycle	Better Measurement for Performance Improvement in Low- and Middle-Income Countries: The Primary Health Care Performance Initiative (PHCPI) Experience of Conceptual Framework Development and Indicator Selection
Health system financing	Government PHC expenditure as percentage of all PHC expenditure	5.1. Governance Revenue raising and Pooling	5.1.2. Revenue Raising	5.1.2.1 Reliable funding sources throughout the duration of the current planning cycle	Better Measurement for Performance Improvement in Low- and Middle-Income Countries: The Primary Health Care Performance Initiative (PHCPI) Experience of Conceptual Framework Development and Indicator Selection
Health system financing	percentage of current government health expenditure devoted to PHC	5.1. Governance Revenue raising and Pooling	5.1.2. Revenue Raising	5.1.2.1 Reliable funding sources throughout the duration of the current planning cycle	Better Measurement for Performance Improvement in Low- and Middle-Income Countries: The Primary Health Care Performance Initiative (PHCPI) Experience of Conceptual Framework Development and Indicator Selection
Health system financing	Per capita PHC expenditure	5.1. Governance Revenue raising and Pooling	5.1.2. Revenue Raising	5.1.2.1 Reliable funding sources throughout the duration of the current planning cycle	Better Measurement for Performance Improvement in Low- and Middle-Income Countries: The Primary Health Care Performance Initiative (PHCPI) Experience of Conceptual Framework Development and Indicator Selection
Health system financing	Reduced wastage and enhanced cost-effective interventions	5.3. Capacity of Public Institutions	5.3.1. Public Financial Management (PFM) System	5.3.1.1. Health budget formulation enables flexible spending that aligns with sector priorities, and ensures that public funds are directed toward priority populations, essential interventions, and providers payments are structured to reward outputs and performance	Using the World Health Organization health system building blocks through survey of healthcare professionals to determine the performance of public healthcare facilities
Health system financing	OOPPHC expenditure as percentage of all Public Health Care expenditure	5.2. Purcahsing access and Financial Protection	5.2.2.Financial Protection	5.2.2.2. Out-of-pocket health expenditures are minimized, effective fee exemptions are in place, and informal fees are eliminated to promote equitable access to healthcare	Better Measurement for Performance Improvement in Low- and Middle-Income Countries: The Primary Health Care Performance Initiative (PHCPI) Experience of Conceptual Framework Development and Indicator Selection
Health workforce	Health officials currently maintain a system for tracking healthcare workers to understand availability during emergencies and can identify additional resources as needed to fill gaps	2.1. Health workforce planning	2.1.2. Surge Capacity	2.1.2.1 There is a functional, fully funded roster of rapid response teams for emergency response	A checklist to improve health system resilience to infectious disease outbreaks and natural hazards
Health workforce	Health officials currently have plans for providing security for healthcare workers during emergencies	2.1. Health workforce planning	2.1.2. Surge Capacity	2.1.2.1 There is a functional, fully funded roster of rapid response teams for emergency response	A checklist to improve health system resilience to infectious disease outbreaks and natural hazards
Health workforce	Health officials currently provide continuing medical/public health education to help build and strengthen the healthcare workforce	2.3. Heath workforce management	2.3.3. In-service Training	2.3.3.1. There is accredited in-service and continuing education programs that address learner needs and enhance service provision.	A checklist to improve health system resilience to infectious disease outbreaks and natural hazards
Health workforce	Adherence to clinical guidelines	2.3. Heath workforce management	2.3.3. In-service Training	2.3.3.1. There is accredited in-service and continuing education programs that address learner needs and enhance service provision.	Better Measurement for Performance Improvement in Low- and Middle-Income Countries: The Primary Health Care Performance Initiative (PHCPI) Experience of Conceptual Framework Development and Indicator Selection
Health workforce	Community health worker density per 1000 population	2.3. Heath workforce management	2.3.2. Distribution of Health Workforce	2.3.2.1. Equitable distribution of the health workforce based on needs (urban/rural, population density, health status, health risks).	Better Measurement for Performance Improvement in Low- and Middle-Income Countries: The Primary Health Care Performance Initiative (PHCPI) Experience of Conceptual Framework Development and Indicator Selection
Health workforce	Health officials are working with facilities to meet international benchmarks for human resource development	2.3. Heath workforce management	2.3.3. In-service Training	2.3.3.1. There is accredited in-service and continuing education programs that address learner needs and enhance service provision.	A checklist to improve health system resilience to infectious disease outbreaks and natural hazards
Service delivery	Tuberculosis treatment success rate (% of new cases)	6.1. Governance and Management	6.1.1. Service delivery planning employs balanced service delivery	6.1.1.1. Service delivery planning is data-informed, employs balanced service delivery, and ensures continuity of services during emergencies	Towards universal health coverage in the WHO African Region: assessing health system functionality, incorporating lessons from COVID-19
Health workforce	Provider absence rate	2.3. Heath workforce management	2.3.4. Managing Health Workforce Absenteeism	2.3.4.1. A system in place to manage health workforce absences in the public sector , address causes, and regulate dual practice	Better Measurement for Performance Improvement in Low- and Middle-Income Countries: The Primary Health Care Performance Initiative (PHCPI) Experience of Conceptual Framework Development and Indicator Selection
Health workforce	physician density per 1000 population	2.3. Heath workforce management	2.3.2. Distribution of Health Workforce	2.3.2.1. Equitable distribution of the health workforce based on needs (urban/rural, population density, health status, health risks).	Better Measurement for Performance Improvement in Low- and Middle-Income Countries: The Primary Health Care Performance Initiative (PHCPI) Experience of Conceptual Framework Development and Indicator Selection
Health workforce	nurse and midwife density per 1000 population	2.3. Heath workforce management	2.3.2. Distribution of Health Workforce	2.3.2.1. Equitable distribution of the health workforce based on needs (urban/rural, population density, health status, health risks).	Better Measurement for Performance Improvement in Low- and Middle-Income Countries: The Primary Health Care Performance Initiative (PHCPI) Experience of Conceptual Framework Development and Indicator Selection
Health workforce	Health officials can currently support routine and just-in-time healthcare workforce training necessary for outbreak response, including how to diagnose, treat, isolate, and report cases	2.3. Heath workforce management	2.3.3. In-service Training	2.3.3.1. There is accredited in-service and continuing education programs that address learner needs and enhance service provision.	A checklist to improve health system resilience to infectious disease outbreaks and natural hazards
Health workforce	Qualified staff	2.3. Heath workforce management	2.3.3. In-service Training	2.3.3.1. There is accredited in-service and continuing education programs that address learner needs and enhance service provision.	Using the World Health Organization health system building blocks through survey of healthcare professionals to determine the performance of public healthcare facilities
Health workforce	Number of Surgeon	2.3. Heath workforce management	2.3.2. Distribution of Health Workforce	2.3.2.1. Equitable distribution of the health workforce based on needs (urban/rural, population density, health status, health risks).	Evaluation of health system resilience in 60 countries based on their responses to COVID-19
Health workforce	Number of Physicians	2.3. Heath workforce management	2.3.2. Distribution of Health Workforce	2.3.2.1. Equitable distribution of the health workforce based on needs (urban/rural, population density, health status, health risks).	Evaluation of health system resilience in 60 countries based on their responses to COVID-19
Health workforce	Number of Nurse	2.3. Heath workforce management	2.3.2. Distribution of Health Workforce	2.3.2.1. Equitable distribution of the health workforce based on needs (urban/rural, population density, health status, health risks).	Evaluation of health system resilience in 60 countries based on their responses to COVID-19
Health workforce	Number of Pharmacist	2.3. Heath workforce management	2.3.2. Distribution of Health Workforce	2.3.2.1. Equitable distribution of the health workforce based on needs (urban/rural, population density, health status, health risks).	Evaluation of health system resilience in 60 countries based on their responses to COVID-19
Health workforce	Number of Biomedical technician	2.3. Heath workforce management	2.3.2. Distribution of Health Workforce	2.3.2.1. Equitable distribution of the health workforce based on needs (urban/rural, population density, health status, health risks).	Evaluation of health system resilience in 60 countries based on their responses to COVID-19
Health workforce	Number of medical (general and specialist) personnel (per 1000 population)	2.3. Heath workforce management	2.3.2. Distribution of Health Workforce	2.3.2.1. Equitable distribution of the health workforce based on needs (urban/rural, population density, health status, health risks).	Towards universal health coverage in the WHO African Region: assessing health system functionality, incorporating lessons from COVID-19
Health workforce	Number of nursing personnel (including midwives (per 1000 population))	2.3. Heath workforce management	2.3.2. Distribution of Health Workforce	2.3.2.1. Equitable distribution of the health workforce based on needs (urban/rural, population density, health status, health risks).	Towards universal health coverage in the WHO African Region: assessing health system functionality, incorporating lessons from COVID-19
Health workforce	Community health workers density (per 1000 population)	2.3. Heath workforce management	2.3.2. Distribution of Health Workforce	2.3.2.1. Equitable distribution of the health workforce based on needs (urban/rural, population density, health status, health risks).	Towards universal health coverage in the WHO African Region: assessing health system functionality, incorporating lessons from COVID-19
Leadership and governance	There are standard operating procedures to allow health facility staff to repurpose their infrastructure, staff and medical supplies when facing potential threats	1.1. Vision and strategic direction	1.1.2. Policies and Guidance Documents	1.1.2.1. Policies and guidelines cover all strategic priority areas	Towards universal health coverage in the WHO African Region: assessing health system functionality, incorporating lessons from COVID-19
Leadership and governance	Programme for disinfection, decontamination and vector control is established	1.1. Vision and strategic direction	1.1.2. Policies and Guidance Documents	1.1.2.1. Policies and guidelines cover all strategic priority areas	Towards universal health coverage in the WHO African Region: assessing health system functionality, incorporating lessons from COVID-19
Health workforce	Human resources available to implement IHR core capacity requirements	2.1. Health workforce planning	2.1.2. Surge Capacity	2.1.2.1 There is a functional, fully funded roster of rapid response teams for emergency response	On the resilience of health systems: A methodological exploration across countries in the WHO African Region
Health workforce	Physician density (urban, rural )	2.3. Heath workforce management	2.3.2. Distribution of Health Workforce	2.3.2.1. Equitable distribution of the health workforce based on needs (urban/rural, population density, health status, health risks).	Health system functionality in a low-income country in the midst of conflict: the case of Yemen
Health workforce	Health care workers by specialty	2.3. Heath workforce management	2.3.2. Distribution of Health Workforce	2.3.2.1. Equitable distribution of the health workforce based on needs (urban/rural, population density, health status, health risks).	Health system functionality in a low-income country in the midst of conflict: the case of Yemen
Health workforce	Ensuring mental health (e.g. psychological counselling), family (e.g. childcare), physical (e.g. respite breaks), and financial support for healthcare	2.3. Heath workforce management	2.3.1. Heath sector wages and benefits compared to other government sectors	2.3.1.1. The PayScale and non-wage benefits is competitive and attract and retain qualified health workers	Using the World Health Organization health system building blocks through survey of healthcare professionals to determine the performance of public healthcare facilities
Health workforce	Job satisfaction	2.3. Heath workforce management	2.3.1. Heath sector wages and benefits compared to other government sectors	2.3.1.1. The PayScale and non-wage benefits is competitive and attract and retain qualified health workers	Using the World Health Organization health system building blocks through survey of healthcare professionals to determine the performance of public healthcare facilities
Health workforce	Motivation	2.3. Heath workforce management	2.3.1. Heath sector wages and benefits compared to other government sectors	2.3.1.1. The PayScale and non-wage benefits is competitive and attract and retain qualified health workers	Using the World Health Organization health system building blocks through survey of healthcare professionals to determine the performance of public healthcare facilities
Health workforce	Conducive structure	2.3. Heath workforce management	2.3.1. Heath sector wages and benefits compared to other government sectors	2.3.1.1. The PayScale and non-wage benefits is competitive and attract and retain qualified health workers	Using the World Health Organization health system building blocks through survey of healthcare professionals to determine the performance of public healthcare facilities
Health workforce	Percent of facilities that recruited new staff, volunteers or seconded staff during the pandemic or were able to refer a COVID-19 case to another location	2.1. Health workforce planning	2.1.2. Surge Capacity	2.1.2.1 There is a functional, fully funded roster of rapid response teams for emergency response	Resilience of front-line facilities during COVID-19: evidence from cross-sectional rapid surveys in eight low- and middle-income countries
Health workforce	Dual job-holding in public and private sector	2.3. Heath workforce management	2.3.4. Managing Health Workforce Absenteeism	2.3.4.1. A system in place to manage health workforce absences in the public sector , address causes, and regulate dual practice	Using the World Health Organization health system building blocks through survey of healthcare professionals to determine the performance of public healthcare facilities
Health workforce	Human resources available to implement IHR core capacity requirements (IHR)	2.1. Health workforce planning	2.1.2. Surge Capacity	2.1.2.1 There is a functional, fully funded roster of rapid response teams for emergency response	On the resilience of health systems: A methodological exploration across countries in the WHO African Region
Health workforce	Sources of additional capacities (HR) that may be needed to respond to the threat are identified and procedures to bring these on board are known & agreed (Self-Regulation)	2.1. Health workforce planning	2.1.2. Surge Capacity	2.1.2.1 There is a functional, fully funded roster of rapid response teams for emergency response	On the resilience of health systems: A methodological exploration across countries in the WHO African Region
Health workforce	Staff are appropriately skilled, and supervisory systems functional enough to identify rare or uncommon events when they occur (diversity)	2.3. Heath workforce management	2.3.3. In-service Training	2.3.3.1. There is accredited in-service and continuing education programs that address learner needs and enhance service provision.	On the resilience of health systems: A methodological exploration across countries in the WHO African Region
Health workforce	Appropriate and timely feedback	2.3. Heath workforce management	2.3.3. In-service Training	2.3.3.1. There is accredited in-service and continuing education programs that address learner needs and enhance service provision.	Using the World Health Organization health system building blocks through survey of healthcare professionals to determine the performance of public healthcare facilities
Health workforce	Percentage of facilities in project sites with a designated team orfocal persons for emergency management and service continuity	2.1. Health workforce planning	2.1.2. Surge Capacity	2.1.2.1 There is a functional, fully funded roster of rapid response teams for emergency response	Liberia health system’s journey to long-term recovery and resilience post-Ebola: a case study of an exemplary multi-year collaboration
Health workforce	Health workers pay and retention	2.3. Heath workforce management	2.3.1. Heath sector wages and benefits compared to other government sectors	2.3.1.1. The PayScale and non-wage benefits is competitive and attract and retain qualified health workers	Health system functionality in a low-income country in the midst of conflict: the case of Yemen
Health workforce	Ability to mobilize additional human resources via training of existing workforce or adapting their roles, alongside recruiting and training volunteers	2.3. Heath workforce management	2.3.3. In-service Training	2.3.3.1. There is accredited in-service and continuing education programs that address learner needs and enhance service provision.	Resilience of primary healthcare system across low- and middle-income countries during COVID-19 pandemic: a scoping review
Health workforce	Percentage of facilities in project counties with personnel that have received training with a focus on Health Service Resilience	2.3. Heath workforce management	2.3.3. In-service Training	2.3.3.1. There is accredited in-service and continuing education programs that address learner needs and enhance service provision.	Liberia health system’s journey to long-term recovery and resilience post-Ebola: a case study of an exemplary multi-year collaboration
Health workforce	Ensuring a sufficient supply of personal protective equipment for the workforce	2.1. Health workforce planning	2.1.2. Surge Capacity	2.1.2.1 There is a functional, fully funded roster of rapid response teams for emergency response	Resilience of primary healthcare system across low- and middle-income countries during COVID-19 pandemic: a scoping review
Health workforce	Workforce available and well deployed across urban and rural areas to provide services	2.1. Health workforce planning	2.1.1. Health Workforce Strategy and Data	2.1.1.1.Evidence-based national health workforce plan exists, meets criteria, regularly updated and a mechanism for regular workforce planning and review is in place.	Resilience of primary healthcare system across low- and middle-income countries during COVID-19 pandemic: a scoping review
Leadership and governance	Public, and private sources of additional capacities (staff, infrastructure, medical supplies) for surge capacity are known and procedures to bring these on board are available	1.1. Vision and strategic direction	1.1.2. Policies and Guidance Documents	1.1.2.1. Policies and guidelines cover all strategic priority areas	Towards universal health coverage in the WHO African Region: assessing health system functionality, incorporating lessons from COVID-19
Leadership and governance	Availability of a protocol for prioritization of services to be maintained during emergencies	1.1. Vision and strategic direction	1.1.2. Policies and Guidance Documents	1.1.2.1. Policies and guidelines cover all strategic priority areas	Liberia health system’s journey to long-term recovery and resilience post-Ebola: a case study of an exemplary multi-year collaboration
Leadership and governance	There are agreed standard operating procedures for ensuring functional staff, supplies and infrastructure in the event of a shock event	1.1. Vision and strategic direction	1.1.2. Policies and Guidance Documents	1.1.2.1. Policies and guidelines cover all strategic priority areas	Towards universal health coverage in the WHO African Region: assessing health system functionality, incorporating lessons from COVID-19
Leadership and governance	Availability of a platform to share good practices and lessons learned from healthcare facility perspectives in the context of emergencies	1.1. Vision and strategic direction	1.1.2. Policies and Guidance Documents	1.1.2.1. Policies and guidelines cover all strategic priority areas	Liberia health system’s journey to long-term recovery and resilience post-Ebola: a case study of an exemplary multi-year collaboration
Leadership and governance	SPAR health service provision capacity (C9) score	1.1. Vision and strategic direction	1.1.2. Policies and Guidance Documents	1.1.2.1. Policies and guidelines cover all strategic priority areas	Liberia health system’s journey to long-term recovery and resilience post-Ebola: a case study of an exemplary multi-year collaboration
Leadership and governance	Proportion of counties that have conducted/updated vulnerability and risk analysis and mapping	1.2. Implementation and Management	1.2.4. Fragmentation	1.2.4.1. All subsector and subnational plans are fully aligned with the health sector plan	Liberia health system’s journey to long-term recovery and resilience post-Ebola: a case study of an exemplary multi-year collaboration
Leadership and governance	Availability of a designated authority for health service/system resilience functions	1.1. Vision and strategic direction	1.1.2. Policies and Guidance Documents	1.1.2.1. Policies and guidelines cover all strategic priority areas	Liberia health system’s journey to long-term recovery and resilience post-Ebola: a case study of an exemplary multi-year collaboration
Leadership and governance	Mechanisms exist for coordinating additional capacities (staff, infrastructure, medical supplies) mobilized to respond to threats	1.1. Vision and strategic direction	1.1.2. Policies and Guidance Documents	1.1.2.1. Policies and guidelines cover all strategic priority areas	Towards universal health coverage in the WHO African Region: assessing health system functionality, incorporating lessons from COVID-19
Leadership and governance	Availability of a designated health system focal person or team responsible for providing input in the SPAR C9 assessment process	1.4. Accountability	1.4.3. Accountability to Partners	1.4.3.2. Reports from 100% of DAH recipients are made available on a public platform and all data disaggregated by gender and location	Liberia health system’s journey to long-term recovery and resilience post-Ebola: a case study of an exemplary multi-year collaboration
Leadership and governance	There are functional mechanisms for communication and engagement with non-public health providers working in the area of responsibility of public facilities – such as private sector, NGOs, CSOs, and others	1.4. Accountability	1.4.3. Accountability to Partners	1.4.3.2. Reports from 100% of DAH recipients are made available on a public platform and all data disaggregated by gender and location	Towards universal health coverage in the WHO African Region: assessing health system functionality, incorporating lessons from COVID-19
Leadership and governance	There are functional mechanisms for communication and engagement with community groups in the area of responsibility of public facilities	1.4. Accountability	1.4.2. Accountability to Citizens	1.4.2.1.The mechanisms for vertical financial and performance accountability at national and subnational Levels are fully operational, with regular reports published.	Towards universal health coverage in the WHO African Region: assessing health system functionality, incorporating lessons from COVID-19
Leadership and governance	Availability of functional Quality Management Teams with ToR	1.2. Implementation and Management	1.2.4. Fragmentation	1.2.4.1. All subsector and subnational plans are fully aligned with the health sector plan	Liberia health system’s journey to long-term recovery and resilience post-Ebola: a case study of an exemplary multi-year collaboration
Leadership and governance	Availability of HS SimEx package to test HS capacity for EPR and MEHS	1.1. Vision and strategic direction	1.1.2. Policies and Guidance Documents	1.1.2.1. Policies and guidelines cover all strategic priority areas	Liberia health system’s journey to long-term recovery and resilience post-Ebola: a case study of an exemplary multi-year collaboration
Leadership and governance	Availability of an all-hazard EPR plan (or equivalent) which includes planning for the continuity of routine health services in the event of PHE	1.1. Vision and strategic direction	1.1.2. Policies and Guidance Documents	1.1.2.1. Policies and guidelines cover all strategic priority areas	Liberia health system’s journey to long-term recovery and resilience post-Ebola: a case study of an exemplary multi-year collaboration
Leadership and governance	Simulation exercises have been conducted in the past 1 year, assessing capacity to respond to potential shock events of highest risk of occurrence	1.1. Vision and strategic direction	1.1.2. Policies and Guidance Documents	1.1.2.1. Policies and guidelines cover all strategic priority areas	Towards universal health coverage in the WHO African Region: assessing health system functionality, incorporating lessons from COVID-19
Leadership and governance	Sub County and health facility staff have the required decision space, authority and protocols to initiate action and spend funds in event of shock events	1.1. Vision and strategic direction	1.1.2. Policies and Guidance Documents	1.1.2.1. Policies and guidelines cover all strategic priority areas	Towards universal health coverage in the WHO African Region: assessing health system functionality, incorporating lessons from COVID-19
Health information systems	The County has documented up to date (under 1 year old) mapping of potential shocks – covering acute and chronic disease, environmental, economic, and political shocks	3.1. Health information system governance and management	3.1.2. Data Quality	3.1.2.1. Data quality is consistently monitored through a national mechanism that ensurs accuracy, reliability, and consistency of reported health data.	Towards universal health coverage in the WHO African Region: assessing health system functionality, incorporating lessons from COVID-19
Leadership and governance	Mechanisms are established for detecting and responding to radiological and nuclear emergencies (IHR)	1.2. Implementation and Management	1.2.3. Intersectoral Collaboration for Health	1.2.3.1 Relevant multisectoral policies and legislation are fully implemented at both national and subnational levels and funding from other sectors is allocated to health	On the resilience of health systems: A methodological exploration across countries in the WHO African Region
Leadership and governance	Mechanisms are established for the detection, alert and response to chemical emergencies (IHR)	1.2. Implementation and Management	1.2.3. Intersectoral Collaboration for Health	1.2.3.1 Relevant multisectoral policies and legislation are fully implemented at both national and subnational levels and funding from other sectors is allocated to health	On the resilience of health systems: A methodological exploration across countries in the WHO African Region
Leadership and governance	Mechanisms are established for detecting and responding to foodborne disease and food contamination (IHR)	1.2. Implementation and Management	1.2.3. Intersectoral Collaboration for Health	1.2.3.1 Relevant multisectoral policies and legislation are fully implemented at both national and subnational levels and funding from other sectors is allocated to health	On the resilience of health systems: A methodological exploration across countries in the WHO African Region
Leadership and governance	Mechanisms for detecting and responding to zoonoses and potential zoonoses are established (IHR)	1.2. Implementation and Management	1.2.3. Intersectoral Collaboration for Health	1.2.3.1 Relevant multisectoral policies and legislation are fully implemented at both national and subnational levels and funding from other sectors is allocated to health	On the resilience of health systems: A methodological exploration across countries in the WHO African Region
Leadership and governance	Effective response at PoE is established (IHR)	1.2. Implementation and Management	1.2.3. Intersectoral Collaboration for Health	1.2.3.1 Relevant multisectoral policies and legislation are fully implemented at both national and subnational levels and funding from other sectors is allocated to health	On the resilience of health systems: A methodological exploration across countries in the WHO African Region
Leadership and governance	Effective surveillance and other routine capacities is established (IHR)	1.1. Vision and strategic direction	1.1.2. Policies and Guidance Documents	1.1.2.1. Policies and guidelines cover all strategic priority areas	On the resilience of health systems: A methodological exploration across countries in the WHO African Region
Leadership and governance	Coordination in the prevention, detection and response to public health emergencies at PoE is established (IHR)	1.2. Implementation and Management	1.2.3. Intersectoral Collaboration for Health	1.2.3.1 Relevant multisectoral policies and legislation are fully implemented at both national and subnational levels and funding from other sectors is allocated to health	On the resilience of health systems: A methodological exploration across countries in the WHO African Region
Leadership and governance	General obligations at PoE are fulfilled (IHR)	1.2. Implementation and Management	1.2.3. Intersectoral Collaboration for Health	1.2.3.1 Relevant multisectoral policies and legislation are fully implemented at both national and subnational levels and funding from other sectors is allocated to health	On the resilience of health systems: A methodological exploration across countries in the WHO African Region
Leadership and governance	Mechanisms for effective risk communication during a public health emergency are established (IHR)	1.4. Accountability	1.4.2. Accountability to Citizens	1.4.2.1.The mechanisms for vertical financial and performance accountability at national and subnational Levels are fully operational, with regular reports published.	On the resilience of health systems: A methodological exploration across countries in the WHO African Region
Leadership and governance	Priority public health risks and resources are mapped (IHR)	1.1. Vision and strategic direction	1.1.2. Policies and Guidance Documents	1.1.2.1. Policies and guidelines cover all strategic priority areas	On the resilience of health systems: A methodological exploration across countries in the WHO African Region
Leadership and governance	A Multi-hazard National Public Health Emergency Preparedness and Response Plan is developed (IHR)	1.1. Vision and strategic direction	1.1.2. Policies and Guidance Documents	1.1.2.1. Policies and guidelines cover all strategic priority areas	On the resilience of health systems: A methodological exploration across countries in the WHO African Region
Leadership and governance	Public health emergency response mechanisms are established (IHR)	1.1. Vision and strategic direction	1.1.2. Policies and Guidance Documents	1.1.2.1. Policies and guidelines cover all strategic priority areas	On the resilience of health systems: A methodological exploration across countries in the WHO African Region
Leadership and governance	IHR NFP functions and operations are in place as defined by the IHR (2005)	1.1. Vision and strategic direction	1.1.2. Policies and Guidance Documents	1.1.2.1. Policies and guidelines cover all strategic priority areas	On the resilience of health systems: A methodological exploration across countries in the WHO African Region
Leadership and governance	A mechanism is established for the coordination of relevant sectors in the implementation of IHR	1.2. Implementation and Management	1.2.3. Intersectoral Collaboration for Health	1.2.3.1 Relevant multisectoral policies and legislation are fully implemented at both national and subnational levels and funding from other sectors is allocated to health	On the resilience of health systems: A methodological exploration across countries in the WHO African Region
Health information systems	The County has a functional surveillance network reporting both weekly on notifiable diseases, and monthly on health system capacity changes	3.1. Health information system governance and management	3.1.2. Surveillance	3.1.2.2. Surveillance	Towards universal health coverage in the WHO African Region: assessing health system functionality, incorporating lessons from COVID-19
Leadership and governance	Legislation, laws, regulations, administrative requirements, policies or other government instruments in place are sufficient for implementation of IHR (IHR)	1.2. Implementation and Management	1.2.3. Intersectoral Collaboration for Health	1.2.3.1 Relevant multisectoral policies and legislation are fully implemented at both national and subnational levels and funding from other sectors is allocated to health	On the resilience of health systems: A methodological exploration across countries in the WHO African Region
Leadership and governance	There are pre-agreed mechanisms for sharing of personnel, funds and capacities amongst stakeholders working within their areas of responsibility of primary care facilities (Mobilization)	1.3. oversight and participation	1.3.2. Decentralization	1.3.2.1. Subnational authorities have power over budget allocation	On the resilience of health systems: A methodological exploration across countries in the WHO African Region
Leadership and governance	There are functional mechanisms for communication and engagement with health related sectors working within the areas of responsibility of primary care facilities – such as agriculture, transport, education, and others (Mobilization)	1.2. Implementation and Management	1.2.3. Intersectoral Collaboration for Health	1.2.3.1 Relevant multisectoral policies and legislation are fully implemented at both national and subnational levels and funding from other sectors is allocated to health	On the resilience of health systems: A methodological exploration across countries in the WHO African Region
Leadership and governance	There are functional mechanisms for communication and engagement of primary care facilities with communities they are working within (Mobilization )	1.3. oversight and participation	1.3.3. Participation of Service Users in Decision-Making	1.3.3.1. Community Groups (e.g., patient associations) participate in health-related decision-making at the national and subnational Levels	On the resilience of health systems: A methodological exploration across countries in the WHO African Region
Leadership and governance	There are functional mechanisms for communication and engagement with non-public health partners working within the areas of responsibility of primary care facilities – such as private sector, NGOs, CSOs, and others (Mobilization)	1.2. Implementation and Management	1.2.3. Intersectoral Collaboration for Health	1.2.3.1 Relevant multisectoral policies and legislation are fully implemented at both national and subnational levels and funding from other sectors is allocated to health	On the resilience of health systems: A methodological exploration across countries in the WHO African Region
Leadership and governance	Health facilities are aware of, and able to put in place contingency mechanisms that allow continued essential service provision even when responding to a threat (Self-Regulation)	1.2. Implementation and Management	1.2.4. Fragmentation	1.2.4.1. All subsector and subnational plans are fully aligned with the health sector plan	On the resilience of health systems: A methodological exploration across countries in the WHO African Region
Leadership and governance	There are mechanisms at the management level supporting health facilities to target local resources to an identified health threat without need for bureaucratic authorizations (Self-Regulation)	1.3. Oversight and participation	1.3.2. Decentralization	1.3.2.1. Subnational authorities have power over budget allocation	On the resilience of health systems: A methodological exploration across countries in the WHO African Region
Leadership and governance	Coordination within government (horizontal and vertical) and key stakeholders including civil society	1.3. Oversight and participation	1.3.3. Participation of Service Users in Decision-Making	1.3.3.2. Civil society organizations (e.g., trade unions, professional associations) participate in health-related decision-making at the national and subnational Levels	Resilience of primary healthcare system across low- and middle-income countries during COVID-19 pandemic: a scoping review
Leadership and governance	Presence of a clear and widely understood strategy	1.1. Vision and strategic direction	1.1.1. Explicit Vision	1.1.1.1. National strategy is based on a sound situation analysis of the context with clear and explicit goals and funding priorities	Resilience of primary healthcare system across low- and middle-income countries during COVID-19 pandemic: a scoping review
Leadership and governance	Community participation; participation in the international community (e.g. joint procurement, clinical networks, etc.)	1.4. Accountability	1.4.3. Accountability to Partners	1.4.3.2. Reports from 100% of DAH recipients are made available on a public platform and all data disaggregated by gender and location	Resilience of primary healthcare system across low- and middle-income countries during COVID-19 pandemic: a scoping review
Leadership and governance	Culture of learning; ability to act fast; effective and transparent communication (especially regarding uncertainty)	1.1. Vision and strategic direction	1.1.1. Explicit Vision	1.1.1.1. National strategy is based on a sound situation analysis of the context with clear and explicit goals and funding priorities	Resilience of primary healthcare system across low- and middle-income countries during COVID-19 pandemic: a scoping review
Leadership and governance	The County has documented up to date (under 1 year old) mapping of the health system assets – specifically staff, infrastructure, commodities	1.1. Vision and strategic direction	1.1.2. Policies and Guidance Documents	1.1.2.1. Policies and guidelines cover all strategic priority areas	Towards universal health coverage in the WHO African Region: assessing health system functionality, incorporating lessons from COVID-19
Leadership and governance	Process documentation and intelligence is planned and conducted during a shock event, to generate lessons (Transformation)	1.1. Vision and strategic direction	1.1.2. Policies and Guidance Documents	1.1.2.1. Policies and guidelines cover all strategic priority areas	On the resilience of health systems: A methodological exploration across countries in the WHO African Region
Leadership and governance	There is guidance on comprehensive recovery planning based on assessment, and investment across the health system	1.1. Vision and strategic direction	1.1.2. Policies and Guidance Documents	1.1.2.1. Policies and guidelines cover all strategic priority areas	Towards universal health coverage in the WHO African Region: assessing health system functionality, incorporating lessons from COVID-19
Leadership and governance	Reliance on the best available evidence but adopting the precautionary principle where evidence is uncertain	1.1. Vision and strategic direction	1.1.1. Explicit Vision	1.1.1.1. National strategy is based on a sound situation analysis of the context with clear and explicit goals and funding priorities	Resilience of primary healthcare system across low- and middle-income countries during COVID-19 pandemic: a scoping review
Health system financing	Funding is available and accessible for implementing IHR NFP functions and IHR core capacity strengthening	5.3. Capacity of Public Institutions	5.3.2. Funding to respond to shocks and emergencies	5.3.2.1. Domestic financing for responding to emergencies is in place and allows for timely response	Towards universal health coverage in the WHO African Region: assessing health system functionality, incorporating lessons from COVID-19
Leadership and governance	Emergency Preparedness measured as the overall level of preparedness and experience of society in relation to national emergencies	1.3. oversight and participation	1.3.3. Participation of Service Users in Decision-Making	1.3.3.1. Community Groups (e.g., patient associations) participate in health-related decision-making at the national and subnational Levels	Evaluation of health system resilience in 60 countries based on their responses to COVID-19
Health information systems	Information Technology Indicates the level of national information technology development and promotes a high level of sharing of information resources across society	3.1. Health information system governance and management	3.1.1. National Health Information system	3.1.1.1. National Health information system meets criteria, functional and responsive to health sector needs	Evaluation of health system resilience in 60 countries based on their responses to COVID-19
Leadership and governance	The application of modern information technology and network technology by government departments to provide public services to the community	1.4. Accountability	1.4.2. Accountability to Citizens	1.4.2.1.The mechanisms for vertical financial and performance accountability at national and subnational Levels are fully operational, with regular reports published.	Evaluation of health system resilience in 60 countries based on their responses to COVID-19
Leadership and governance	Government effectiveness as measured by World Bank	1.4. Accountability	1.4.1. Accountability within Government	1.4.1.1. Government-led mechanisms for financial accountability are in place, and reports are regularly published by government agencies	Evaluation of health system resilience in 60 countries based on their responses to COVID-19
Leadership and governance	Capable of moving resources during a crisis to where needed ( self-regulating)	1.3. Oversight and participation	1.3.2. Decentralization	1.3.2.1. Subnational authorities have power over budget allocation	Beyond the crisis: did the Ebola epidemic improve resilience of Liberia’s health system?
Leadership and governance	Works closely with community to build confidence and trust (integrated)	1.4. Accountability	1.4.2. Accountability to Citizens	1.4.2.1.The mechanisms for vertical financial and performance accountability at national and subnational Levels are fully operational, with regular reports published.	Beyond the crisis: did the Ebola epidemic improve resilience of Liberia’s health system?
Leadership and governance	Coordinates with other sectors such as education and transport	1.2. Implementation and Management	1.2.3. Intersectoral Collaboration for Health	1.2.3.1 Relevant multisectoral policies and legislation are fully implemented at both national and subnational levels and funding from other sectors is allocated to health	Beyond the crisis: did the Ebola epidemic improve resilience of Liberia’s health system?
Leadership and governance	Good coordination and communication between government and private sector, between national government and global partners (integrated)	1.4. Accountability	1.4.3. Accountability to Partners	1.4.3.1.National systems for transparent financial reporting of DAH from all recipients at the national and subnational levels are in place and functional	Beyond the crisis: did the Ebola epidemic improve resilience of Liberia’s health system?
Leadership and governance	legislation, laws, regulations, administrative requirements, policies or other government instruments in place are sufficient for implementation of IHR	1.3. oversight and participation	1.3.1. The Right to Health	1.3.1.2 The right to health is realized and monitored through various national mechanisms	Towards universal health coverage in the WHO African Region: assessing health system functionality, incorporating lessons from COVID-19
Leadership and governance	New organizational practices and policies	1.2. Implementation and Management	1.2.2. MoH Management and Leadership Capacities	1.2.2.1. The organizational structure of the Federal and State Ministries of Health are strategically designed to achieve the objectives set in the national health policy.	Using the World Health Organization health system building blocks through survey of healthcare professionals to determine the performance of public healthcare facilities
Leadership and governance	Stringency Index measured as the effective measures taken by the government to contain the further spread of the epidemic situation and to safeguard the national interest and the lives of the people from Oxford tracker	1.3. oversight and participation	1.3.1. The Right to Health	1.3.1.2 The right to health is realized and monitored through various national mechanisms	Evaluation of health system resilience in 60 countries based on their responses to COVID-19
Leadership and governance	The best use of resources	1.2. Implementation and Management	1.2.1. Funding of Health Sector Priorities	1.2.1.2. All priorities of the subnational strategies are sufficiently funded.	Using the World Health Organization health system building blocks through survey of healthcare professionals to determine the performance of public healthcare facilities
Leadership and governance	satisfaction of patients and providers	1.4. Accountability	1.4.2. Accountability to Citizens	1.4.2.1.The mechanisms for vertical financial and performance accountability at national and subnational Levels are fully operational, with regular reports published.	Using the World Health Organization health system building blocks through survey of healthcare professionals to determine the performance of public healthcare facilities
Leadership and governance	Capacity to assemble and manage resources	1.2. Implementation and Management	1.2.1. Funding of Health Sector Priorities	1.2.1.1. All priorities of the national strategy are sufficiently funded.	Using the World Health Organization health system building blocks through survey of healthcare professionals to determine the performance of public healthcare facilities
Leadership and governance	Health officials have established and maintain mechanisms by which the public (care seekers and patients’ families) can obtain information on the status and availability of health facilities and services (eg, through social media or other platforms)	1.4. Accountability	1.4.2. Accountability to Citizens	1.4.2.1.The mechanisms for vertical financial and performance accountability at national and subnational Levels are fully operational, with regular reports published.	A checklist to improve health system resilience to infectious disease outbreaks and natural hazards
Health workforce	Health officials have developed national surge capacity plans for healthcare surges during emergencies	2.1. Health workforce planning	2.1.2. Surge Capacity	2.1.2.1 There is a functional, fully funded roster of rapid response teams for emergency response	A checklist to improve health system resilience to infectious disease outbreaks and natural hazards
Leadership and governance	Health officials have identified existing mobile healthcare assets (e.g., vans, buses) in communities and have considered how these assets might be used in an emergency	1.1. Vision and strategic direction	1.1.2. Policies and Guidance Documents	1.1.2.1. Policies and guidelines cover all strategic priority areas	A checklist to improve health system resilience to infectious disease outbreaks and natural hazards
Leadership and governance	Health officials have identified community leaders within vulnerable/marginalized groups to help gain trust	1.4. Accountability	1.4.2. Accountability to Citizens	1.4.2.1.The mechanisms for vertical financial and performance accountability at national and subnational Levels are fully operational, with regular reports published.	A checklist to improve health system resilience to infectious disease outbreaks and natural hazards
Leadership and governance	Health officials have identified vulnerable and marginalized groups in advance of an emergency and ensure they are engaged in the emergency planning process	1.3. oversight and participation	1.3.3. Participation of Service Users in Decision-Making	1.3.3.1. Community Groups (e.g., patient associations) participate in health-related decision-making at the national and subnational Levels	A checklist to improve health system resilience to infectious disease outbreaks and natural hazards
Leadership and governance	Health officials have developed national plans for evacuations during emergencies	1.1. Vision and strategic direction	1.1.2. Policies and Guidance Documents	1.1.2.1. Policies and guidelines cover all strategic priority areas	A checklist to improve health system resilience to infectious disease outbreaks and natural hazards
Leadership and governance	Health officials currently have response plans that include prioritization of healthcare facilities for restoration of critical infrastructure	1.3. oversight and participation	1.3.2. Decentralization	1.3.2.1. Subnational authorities have power over budget allocation	A checklist to improve health system resilience to infectious disease outbreaks and natural hazards
Leadership and governance	Health officials are currently able to convey to the health system which diseases and conditions necessitate reporting and expected frequency	1.1. Vision and strategic direction	1.1.2. Policies and Guidance Documents	1.1.2.1. Policies and guidelines cover all strategic priority areas	Beyond the crisis: did the Ebola epidemic improve resilience of Liberia’s health system?
Leadership and governance	Appropriate use of staff working hour	1.3. Oversight and participation	1.3.2. Decentralization	1.3.2.3 Subnational authorities have power over recruitment and dismissal of health workforce personnel and management positions within ministries of health.	Using the World Health Organization health system building blocks through survey of healthcare professionals to determine the performance of public healthcare facilities
Leadership and governance	Global governance assessment-public sector corruption	1.4. Accountability	1.4.1. Accountability within Government	1.4.1.1. Government-led mechanisms for financial accountability are in place, and reports are regularly published by government agencies	Health system functionality in a low-income country in the midst of conflict: the case of Yemen
Leadership and governance	Can make rapid changes to improve function in response to a crisis or shifting conditions (adaptive)	1.1. Vision and strategic direction	1.1.2. Policies and Guidance Documents	1.1.2.1. Policies and guidelines cover all strategic priority areas	Beyond the crisis: did the Ebola epidemic improve resilience of Liberia’s health system?
Leadership and governance	Having a clear vision for an effective PHC strategy	1.1. Vision and strategic direction	1.1.1. Explicit Vision	1.1.1.1. National strategy is based on a sound situation analysis of the context with clear and explicit goals and funding priorities	Resilience of primary healthcare system across low- and middle-income countries during COVID-19 pandemic: a scoping review
Leadership and governance	mechanism is established for the coordination of relevant sectors in the implementation of IHR	1.2. Implementation and Management	1.2.3. Intersectoral Collaboration for Health	1.2.3.1 Relevant multisectoral policies and legislation are fully implemented at both national and subnational levels and funding from other sectors is allocated to health	Towards universal health coverage in the WHO African Region: assessing health system functionality, incorporating lessons from COVID-19
Health workforce	IHR NFP functions and operations are in place as defined by the IHR	2.1. Health workforce planning	2.1.2. Surge Capacity	2.1.2.1 There is a functional, fully funded roster of rapid response teams for emergency response	Towards universal health coverage in the WHO African Region: assessing health system functionality, incorporating lessons from COVID-19
Leadership and governance	Public health emergency response mechanisms are established	1.3. oversight and participation	1.3.1. The Right to Health	1.3.1.2 The right to health is realized and monitored through various national mechanisms	Towards universal health coverage in the WHO African Region: assessing health system functionality, incorporating lessons from COVID-19
Leadership and governance	Multi-hazard National Public Health Emergency Preparedness and Response Plan is developed	1.1. Vision and strategic direction	1.1.2. Policies and Guidance Documents	1.1.2.1. Policies and guidelines cover all strategic priority areas	Towards universal health coverage in the WHO African Region: assessing health system functionality, incorporating lessons from COVID-19
Leadership and governance	Priority public health risks and resources are mapped	1.1. Vision and strategic direction	1.1.2. Policies and Guidance Documents	1.1.2.1. Policies and guidelines cover all strategic priority areas	Towards universal health coverage in the WHO African Region: assessing health system functionality, incorporating lessons from COVID-19
Leadership and governance	Mechanisms for effective risk communication during a public health emergency are established	1.4. Accountability	1.4.2. Accountability to Citizens	1.4.2.1.The mechanisms for vertical financial and performance accountability at national and subnational Levels are fully operational, with regular reports published.	Towards universal health coverage in the WHO African Region: assessing health system functionality, incorporating lessons from COVID-19
Medical products, vaccines and technologies	Pricing for generic medicines-median consumer price ratio	4.1.Governance	4.1.2. Public Procurement System	4.1.2.1. Public Procurement systems meet national and international standards with transparency and accountability	Health system functionality in a low-income country in the midst of conflict: the case of Yemen
Medical products, vaccines and technologies	Availability of essential drugs	4.3. Availability	4.3.1. Availability of Essential Medicines and medical products and equipment	4.3.1.1.National Essential Medicines List (EML) aligns with the health priorities of the country and is regularly updated.	Better Measurement for Performance Improvement in Low- and Middle-Income Countries: The Primary Health Care Performance Initiative (PHCPI) Experience of Conceptual Framework Development and Indicator Selection
Medical products, vaccines and technologies	Basic equipment availability	4.3. Availability	4.3.1. Availability of Essential Medicines and medical products and equipment	4.3.1.1.National Essential Medicines List (EML) aligns with the health priorities of the country and is regularly updated.	Better Measurement for Performance Improvement in Low- and Middle-Income Countries: The Primary Health Care Performance Initiative (PHCPI) Experience of Conceptual Framework Development and Indicator Selection
Medical products, vaccines and technologies	adequate drugs, medical supplies, medical apparatuses and equipment	4.3. Availability	4.3.1. Availability of Essential Medicines and medical products and equipment	4.3.1.1.National Essential Medicines List (EML) aligns with the health priorities of the country and is regularly updated.	Using the World Health Organization health system building blocks through survey of healthcare professionals to determine the performance of public healthcare facilities
Medical products, vaccines and technologies	Up-to-date technologies for patient diagnosis	4.1.Governance	4.1.1. Governance of Medical Products and Technologies	4.1.1.2. National Regulatory System meets criteria and functioning at national and subnational levels.	Using the World Health Organization health system building blocks through survey of healthcare professionals to determine the performance of public healthcare facilities
Medical products, vaccines and technologies	new organizational practices and policies	4.1.Governance	4.1.1. Governance of Medical Products and Technologies	4.1.1.1. Comprehensive National Policy that sets clear standards for medicines, vaccines, and health products, and includes multi-year planning	Using the World Health Organization health system building blocks through survey of healthcare professionals to determine the performance of public healthcare facilities
Medical products, vaccines and technologies	Adequate stock of essential equipment and supplies	4.3. Availability	4.3.1. Availability of Essential Medicines and medical products and equipment	4.3.1.1.National Essential Medicines List (EML) aligns with the health priorities of the country and is regularly updated.	Resilience of primary healthcare system across low- and middle-income countries during COVID-19 pandemic: a scoping review
Medical products, vaccines and technologies	Health officials have the ability to assess the availability of personal protective equipment and have plans for accessing and distributing additional supplies should shortages arise	4.2.Supply Chain management	4.2.2. Timeliness of Distribution to Respond to Health Emergencies	4.2.2.1. Timely distribution to meet needs and system in place to ensure products are available in the event of a health emergency	A checklist to improve health system resilience to infectious disease outbreaks and natural hazards
Medical products, vaccines and technologies	networking with the external environment	4.1.Governance	4.1.1. Governance of Medical Products and Technologies	4.1.1.1. Comprehensive National Policy that sets clear standards for medicines, vaccines, and health products, and includes multi-year planning	Using the World Health Organization health system building blocks through survey of healthcare professionals to determine the performance of public healthcare facilities
Medical products, vaccines and technologies	Percent of facilities that did not report moderate to severe challenges with supplies during the pandemic	4.2.Supply Chain management	4.2.2. Timeliness of Distribution to Respond to Health Emergencies	4.2.2.1. Timely distribution to meet needs and system in place to ensure products are available in the event of a health emergency	Resilience of front-line facilities during COVID-19: evidence from cross-sectional rapid surveys in eight low- and middle-income countries
Medical products, vaccines and technologies	Availability of vaccines	4.3. Availability	4.3.1. Availability of Essential Medicines and medical products and equipment	4.3.1.1.National Essential Medicines List (EML) aligns with the health priorities of the country and is regularly updated.	Better Measurement for Performance Improvement in Low- and Middle-Income Countries: The Primary Health Care Performance Initiative (PHCPI) Experience of Conceptual Framework Development and Indicator Selection
Medical products, vaccines and technologies	Health officials currently provide guidance for appropriate waste handling and equipment disinfection (including medical and radioactive waste)	4.1.Governance	4.1.1. Governance of Medical Products and Technologies	4.1.1.2. National Regulatory System meets criteria and functioning at national and subnational levels.	A checklist to improve health system resilience to infectious disease outbreaks and natural hazards
Medical products, vaccines and technologies	Health officials currently have plans for sustaining supply chains (medicines and vaccines, equipment, supplies) during emergencies	4.2.Supply Chain management	4.2.2. Timeliness of Distribution to Respond to Health Emergencies	4.2.2.1. Timely distribution to meet needs and system in place to ensure products are available in the event of a health emergency	A checklist to improve health system resilience to infectious disease outbreaks and natural hazards
Medical products, vaccines and technologies	Stock of PPE	4.3. Availability	4.3.1. Availability of Essential Medicines and medical products and equipment	4.3.1.1.National Essential Medicines List (EML) aligns with the health priorities of the country and is regularly updated.	Resilience of primary healthcare system across low- and middle-income countries during COVID-19 pandemic: a scoping review
Medical products, vaccines and technologies	Regulation system capacity	4.1.Governance	4.1.1. Governance of Medical Products and Technologies	4.1.1.2. National Regulatory System meets criteria and functioning at national and subnational levels.	Health system functionality in a low-income country in the midst of conflict: the case of Yemen
Medical products, vaccines and technologies	Supply regularities	4.2.Supply Chain management	4.2.2. Timeliness of Distribution to Respond to Health Emergencies	4.2.2.1. Timely distribution to meet needs and system in place to ensure products are available in the event of a health emergency	Health system functionality in a low-income country in the midst of conflict: the case of Yemen
Health workforce	Supportive management: supervision	2.3. Heath workforce management	2.3.3. In-service Training	2.3.3.1. There is accredited in-service and continuing education programs that address learner needs and enhance service provision.	Better Measurement for Performance Improvement in Low- and Middle-Income Countries: The Primary Health Care Performance Initiative (PHCPI) Experience of Conceptual Framework Development and Indicator Selection
Service delivery	Mortality from Cardio Vascular Disease (CVD), cancer, diabetes or Chronic Respiratory Disease (CRD) between exact ages 30 and 70 years (%)	6.1. Governance and Management	6.1.1. Service delivery planning employs balanced service delivery	6.1.1.1. Service delivery planning is data-informed, employs balanced service delivery, and ensures continuity of services during emergencies	Towards universal health coverage in the WHO African Region: assessing health system functionality, incorporating lessons from COVID-19
Service delivery	There exist processes to guide facilities on how to identify and shield staff, infrastructure and medical supplies for continuing essential services provision during threats	6.1. Governance and Management	6.1.1. Service delivery planning employs balanced service delivery	6.1.1.1. Service delivery planning is data-informed, employs balanced service delivery, and ensures continuity of services during emergencies	Towards universal health coverage in the WHO African Region: assessing health system functionality, incorporating lessons from COVID-19
Service delivery	Quality assurance processes	6.1. Governance and Management	6.1.2. Management of operations	6.1.2.3. Systems in place to ensure quality of service at facilities level	Better Measurement for Performance Improvement in Low- and Middle-Income Countries: The Primary Health Care Performance Initiative (PHCPI) Experience of Conceptual Framework Development and Indicator Selection
Health workforce	Supportive management: formal training	2.3. Heath workforce management	2.3.3. In-service Training	2.3.3.1. There is accredited in-service and continuing education programs that address learner needs and enhance service provision.	Better Measurement for Performance Improvement in Low- and Middle-Income Countries: The Primary Health Care Performance Initiative (PHCPI) Experience of Conceptual Framework Development and Indicator Selection
Service delivery	Care seeking behavior for child pneumonia	6.1. Governance and Management	6.1.1. Service delivery planning employs balanced service delivery	6.1.1.1. Service delivery planning is data-informed, employs balanced service delivery, and ensures continuity of services during emergencies	Towards universal health coverage in the WHO African Region: assessing health system functionality, incorporating lessons from COVID-19
Health workforce	Health facilities providing supervision and support to community health workers	2.3. Heath workforce management	2.3.3. In-service Training	2.3.3.1. There is accredited in-service and continuing education programs that address learner needs and enhance service provision.	Better Measurement for Performance Improvement in Low- and Middle-Income Countries: The Primary Health Care Performance Initiative (PHCPI) Experience of Conceptual Framework Development and Indicator Selection
Leadership and governance	Regular management meetings	1.4. Accountability	1.4.1. Accountability within Government	1.4.1.2. Government-led performance accountability mechanisms are fully operational, with regularly published reports	Better Measurement for Performance Improvement in Low- and Middle-Income Countries: The Primary Health Care Performance Initiative (PHCPI) Experience of Conceptual Framework Development and Indicator Selection
Leadership and governance	Community attendance at management meetings	1.4. Accountability	1.4.3. Accountability to Partners	1.4.3.2. Reports from 100% of DAH recipients are made available on a public platform and all data disaggregated by gender and location	Better Measurement for Performance Improvement in Low- and Middle-Income Countries: The Primary Health Care Performance Initiative (PHCPI) Experience of Conceptual Framework Development and Indicator Selection
Service delivery	under five mortality rate	6.2. Access and Availability	6.2.1. Health Benefit Package	6.2.1.2. All elements or components of the health benefit package are being executed or operationalized within a health system.	Better Measurement for Performance Improvement in Low- and Middle-Income Countries: The Primary Health Care Performance Initiative (PHCPI) Experience of Conceptual Framework Development and Indicator Selection
Health system financing	Cost-related access: are there transportation costs/barriers to your receiving care?	5.2. Purcahsing access and Financial Protection	5.2.1. Purchasing, providers payments and conditions of access	5.2.1.2. Entitlements to health benefits are explicitly defined, universal in nature, and ensures access to population in need	Better Measurement for Performance Improvement in Low- and Middle-Income Countries: The Primary Health Care Performance Initiative (PHCPI) Experience of Conceptual Framework Development and Indicator Selection
Health system financing	Cost-related access: did you not fill a prescription; skipped a recommended medical test, treatment, or follow-up; or have a medical problem but did not visit the doctor or clinic in the past year because of cost?	5.2. Purcahsing access and Financial Protection	5.2.1. Purchasing, providers payments and conditions of access	5.2.1.2. Entitlements to health benefits are explicitly defined, universal in nature, and ensures access to population in need	Better Measurement for Performance Improvement in Low- and Middle-Income Countries: The Primary Health Care Performance Initiative (PHCPI) Experience of Conceptual Framework Development and Indicator Selection
Service delivery	Infant mortality (per 1000 live births)	6.2. Access and Availability	6.2.1. Health Benefit Package	6.2.1.2. All elements or components of the health benefit package are being executed or operationalized within a health system.	Health system functionality in a low-income country in the midst of conflict: the case of Yemen
Leadership and governance	Mechanisms are established for detecting and responding to radiological and nuclear emergencies	1.2. Implementation and Management	1.2.3. Intersectoral Collaboration for Health	1.2.3.1 Relevant multisectoral policies and legislation are fully implemented at both national and subnational levels and funding from other sectors is allocated to health	Towards universal health coverage in the WHO African Region: assessing health system functionality, incorporating lessons from COVID-19
Service delivery	Smoking prevalence, total (ages 15+ years) (QoC)	6.2. Access and Availability	6.2.1. Health Benefit Package	6.2.1.2. All elements or components of the health benefit package are being executed or operationalized within a health system.	Towards universal health coverage in the WHO African Region: assessing health system functionality, incorporating lessons from COVID-19
Service delivery	Total alcohol consumption per capita (liters of pure alcohol), 15+ years of age (QoC)	6.2. Access and Availability	6.2.1. Health Benefit Package	6.2.1.2. All elements or components of the health benefit package are being executed or operationalized within a health system.	Towards universal health coverage in the WHO African Region: assessing health system functionality, incorporating lessons from COVID-19
Service delivery	Intimate partner violence against women (%)	6.2. Access and Availability	6.2.1. Health Benefit Package	6.2.1.2. All elements or components of the health benefit package are being executed or operationalized within a health system.	Towards universal health coverage in the WHO African Region: assessing health system functionality, incorporating lessons from COVID-19
Health workforce	Women’s labor force participation	2.3. Heath workforce management	2.3.2. Distribution of Health Workforce	2.3.2.1. Equitable distribution of the health workforce based on needs (urban/rural, population density, health status, health risks).	Towards universal health coverage in the WHO African Region: assessing health system functionality, incorporating lessons from COVID-19
Service delivery	Primary school completion rate, female (% of relevant age group)	6.2. Access and Availability	6.2.1. Health Benefit Package	6.2.1.2. All elements or components of the health benefit package are being executed or operationalized within a health system.	Towards universal health coverage in the WHO African Region: assessing health system functionality, incorporating lessons from COVID-19
Health system financing	Cost-related access: did you have serious problems paying for the visit, or were unable to pay medical bills?	5.2. Purcahsing access and Financial Protection	5.2.1. Purchasing, providers payments and conditions of access	5.2.1.2. Entitlements to health benefits are explicitly defined, universal in nature, and ensures access to population in need	Better Measurement for Performance Improvement in Low- and Middle-Income Countries: The Primary Health Care Performance Initiative (PHCPI) Experience of Conceptual Framework Development and Indicator Selection
Leadership and governance	Percent of facilities that discussed COVID-19 vaccination with patients and the community	1.3. oversight and participation	1.3.3. Participation of Service Users in Decision-Making	1.3.3.1. Community Groups (e.g., patient associations) participate in health-related decision-making at the national and subnational Levels	Resilience of front-line facilities during COVID-19: evidence from cross-sectional rapid surveys in eight low- and middle-income countries
Service delivery	Maternal Mortality Ration	6.2. Access and Availability	6.2.1. Health Benefit Package	6.2.1.2. All elements or components of the health benefit package are being executed or operationalized within a health system.	Better Measurement for Performance Improvement in Low- and Middle-Income Countries: The Primary Health Care Performance Initiative (PHCPI) Experience of Conceptual Framework Development and Indicator Selection
Service delivery	Life expectancy at birth	6.2. Access and Availability	6.2.1. Health Benefit Package	6.2.1.2. All elements or components of the health benefit package are being executed or operationalized within a health system.	Health system functionality in a low-income country in the midst of conflict: the case of Yemen
Leadership and governance	Mechanisms for detecting and responding to zoonoses and potential zoonoses are established	1.2. Implementation and Management	1.2.3. Intersectoral Collaboration for Health	1.2.3.1 Relevant multisectoral policies and legislation are fully implemented at both national and subnational levels and funding from other sectors is allocated to health	Towards universal health coverage in the WHO African Region: assessing health system functionality, incorporating lessons from COVID-19
Leadership and governance	Mechanisms are established for detecting and responding to foodborne disease and food contamination	1.2. Implementation and Management	1.2.3. Intersectoral Collaboration for Health	1.2.3.1 Relevant multisectoral policies and legislation are fully implemented at both national and subnational levels and funding from other sectors is allocated to health	Towards universal health coverage in the WHO African Region: assessing health system functionality, incorporating lessons from COVID-19
Leadership and governance	Coordination in the prevention, detection and response to public health emergencies at PoE is established	1.2. Implementation and Management	1.2.3. Intersectoral Collaboration for Health	1.2.3.1 Relevant multisectoral policies and legislation are fully implemented at both national and subnational levels and funding from other sectors is allocated to health	Towards universal health coverage in the WHO African Region: assessing health system functionality, incorporating lessons from COVID-19
Service delivery	Number of road traffic injury cases disaggregated by accident type	6.2. Access and Availability	6.2.1. Health Benefit Package	6.2.1.2. All elements or components of the health benefit package are being executed or operationalized within a health system.	COVID-19 and resilience of healthcare systems in ten countries
Leadership and governance	Mechanisms are established for the detection, alert and response to chemical emergencies	1.2. Implementation and Management	1.2.3. Intersectoral Collaboration for Health	1.2.3.1 Relevant multisectoral policies and legislation are fully implemented at both national and subnational levels and funding from other sectors is allocated to health	Towards universal health coverage in the WHO African Region: assessing health system functionality, incorporating lessons from COVID-19
Service delivery	Secondary school completion rate, female (% of relevant age group)	6.2. Access and Availability	6.2.1. Health Benefit Package	6.2.1.2. All elements or components of the health benefit package are being executed or operationalized within a health system.	Towards universal health coverage in the WHO African Region: assessing health system functionality, incorporating lessons from COVID-19
Service delivery	Literacy rate among adults aged 15 and over	6.2. Access and Availability	6.2.1. Health Benefit Package	6.2.1.2. All elements or components of the health benefit package are being executed or operationalized within a health system.	Health system functionality in a low-income country in the midst of conflict: the case of Yemen
Leadership and governance	Effective response at PoE is established	1.2. Implementation and Management	1.2.3. Intersectoral Collaboration for Health	1.2.3.1 Relevant multisectoral policies and legislation are fully implemented at both national and subnational levels and funding from other sectors is allocated to health	Towards universal health coverage in the WHO African Region: assessing health system functionality, incorporating lessons from COVID-19
Service delivery	Malaria incidence rate (per 100 000)	6.2. Access and Availability	6.2.1. Health Benefit Package	6.2.1.2. All elements or components of the health benefit package are being executed or operationalized within a health system.	Health system functionality in a low-income country in the midst of conflict: the case of Yemen
Service delivery	Fertility Rate	6.2. Access and Availability	6.2.1. Health Benefit Package	6.2.1.2. All elements or components of the health benefit package are being executed or operationalized within a health system.	Health system functionality in a low-income country in the midst of conflict: the case of Yemen
Leadership and governance	General obligations at PoE are fulfilled	1.2. Implementation and Management	1.2.3. Intersectoral Collaboration for Health	1.2.3.1 Relevant multisectoral policies and legislation are fully implemented at both national and subnational levels and funding from other sectors is allocated to health	Towards universal health coverage in the WHO African Region: assessing health system functionality, incorporating lessons from COVID-19
Service delivery	Suicide mortality rate (per 100000 population)	6.2. Access and Availability	6.2.1. Health Benefit Package	6.2.1.2. All elements or components of the health benefit package are being executed or operationalized within a health system.	Towards universal health coverage in the WHO African Region: assessing health system functionality, incorporating lessons from COVID-19
Leadership and governance	System in place to assess community trust (patient-reported experiences/outcomes	1.4. Accountability	1.4.2. Accountability to Citizens	1.4.2.1.The mechanisms for vertical financial and performance accountability at national and subnational Levels are fully operational, with regular reports published.	Liberia health system’s journey to long-term recovery and resilience post-Ebola: a case study of an exemplary multi-year collaboration
Service delivery	Maternal mortality ratio (per 100 000 births)	6.1. Governance and Management	6.1.1. Service delivery planning employs balanced service delivery	6.1.1.1. Service delivery planning is data-informed, employs balanced service delivery, and ensures continuity of services during emergencies	Health system functionality in a low-income country in the midst of conflict: the case of Yemen
Leadership and governance	Health officials currently have plans for translating public health information into local dialects	1.3. oversight and participation	1.3.1. The Right to Health	1.3.1.2 The right to health is realized and monitored through various national mechanisms	A checklist to improve health system resilience to infectious disease outbreaks and natural hazards
Leadership and governance	Health officials currently have plans for launching public education campaigns to educate local populations about patients with high consequence infectious diseases to reassure them that facilities are safe and are the best options for treatment	1.3. oversight and participation	1.3.1. The Right to Health	1.3.1.2 The right to health is realized and monitored through various national mechanisms	A checklist to improve health system resilience to infectious disease outbreaks and natural hazards
Service delivery	severe acute malnutrition (SAM) prevalence	6.2. Access and Availability	6.2.1. Health Benefit Package	6.2.1.2. All elements or components of the health benefit package are being executed or operationalized within a health system.	Health system functionality in a low-income country in the midst of conflict: the case of Yemen
Leadership and governance	Effective surveillance and other routine capacities is established	1.2. Implementation and Management	1.2.3. Intersectoral Collaboration for Health	1.2.3.1 Relevant multisectoral policies and legislation are fully implemented at both national and subnational levels and funding from other sectors is allocated to health	Towards universal health coverage in the WHO African Region: assessing health system functionality, incorporating lessons from COVID-19
Service delivery	Prevalence of cardiovascular disease	6.1. Governance and Management	6.1.1. Service delivery planning employs balanced service delivery	6.1.1.1. Service delivery planning is data-informed, employs balanced service delivery, and ensures continuity of services during emergencies	Health system functionality in a low-income country in the midst of conflict: the case of Yemen
Service delivery	Prevalence of cerebrovascular disease	6.1. Governance and Management	6.1.1. Service delivery planning employs balanced service delivery	6.1.1.1. Service delivery planning is data-informed, employs balanced service delivery, and ensures continuity of services during emergencies	Health system functionality in a low-income country in the midst of conflict: the case of Yemen
Service delivery	Prevalence of chronic respiratory disease	6.1. Governance and Management	6.1.1. Service delivery planning employs balanced service delivery	6.1.1.1. Service delivery planning is data-informed, employs balanced service delivery, and ensures continuity of services during emergencies	Health system functionality in a low-income country in the midst of conflict: the case of Yemen
Service delivery	Infant mortality (per 1000 births)	6.1. Governance and Management	6.1.1. Service delivery planning employs balanced service delivery	6.1.1.1. Service delivery planning is data-informed, employs balanced service delivery, and ensures continuity of services during emergencies	Liberia health system’s journey to long-term recovery and resilience post-Ebola: a case study of an exemplary multi-year collaboration
Service delivery	Under-five mortality rate (deaths per 1000 live births)	6.1. Governance and Management	6.1.1. Service delivery planning employs balanced service delivery	6.1.1.1. Service delivery planning is data-informed, employs balanced service delivery, and ensures continuity of services during emergencies	Liberia health system’s journey to long-term recovery and resilience post-Ebola: a case study of an exemplary multi-year collaboration
Service delivery	Maternal mortality ratio (maternal deaths per 100,000 live births)	6.1. Governance and Management	6.1.1. Service delivery planning employs balanced service delivery	6.1.1.1. Service delivery planning is data-informed, employs balanced service delivery, and ensures continuity of services during emergencies	Liberia health system’s journey to long-term recovery and resilience post-Ebola: a case study of an exemplary multi-year collaboration
Service delivery	Pregnancy-related mortality ratio (100,000 live births)	6.1. Governance and Management	6.1.1. Service delivery planning employs balanced service delivery	6.1.1.1. Service delivery planning is data-informed, employs balanced service delivery, and ensures continuity of services during emergencies	Liberia health system’s journey to long-term recovery and resilience post-Ebola: a case study of an exemplary multi-year collaboration
Service delivery	Neonatal mortality rate	6.1. Governance and Management	6.1.1. Service delivery planning employs balanced service delivery	6.1.1.1. Service delivery planning is data-informed, employs balanced service delivery, and ensures continuity of services during emergencies	Better Measurement for Performance Improvement in Low- and Middle-Income Countries: The Primary Health Care Performance Initiative (PHCPI) Experience of Conceptual Framework Development and Indicator Selection
Service delivery	Children under-5 with fever receiving malaria treatment	6.1. Governance and Management	6.1.1. Service delivery planning employs balanced service delivery	6.1.1.1. Service delivery planning is data-informed, employs balanced service delivery, and ensures continuity of services during emergencies	Liberia health system’s journey to long-term recovery and resilience post-Ebola: a case study of an exemplary multi-year collaboration
Service delivery	There are agreed protocols to guide absorption of resources and skills mobilized during a response to an event into the routine system	6.1. Governance and Management	6.1.2. Management of operations	6.1.2.2. Data informs decision-making, performance monitoring, and strategic planning at all levels.	Towards universal health coverage in the WHO African Region: assessing health system functionality, incorporating lessons from COVID-19
Service delivery	There are protocols to constantly monitor changing performance of the health system during a shock event (Transformation )	6.1. Governance and Management	6.1.2. Management of operations	6.1.2.2. Data informs decision-making, performance monitoring, and strategic planning at all levels.	On the resilience of health systems: A methodological exploration across countries in the WHO African Region
Service delivery	There are agreed protocols to guide absorption of resources and skills mobilized during a response to an event into the routine system ( Transformation)	6.1. Governance and Management	6.1.2. Management of operations	6.1.2.2. Data informs decision-making, performance monitoring, and strategic planning at all levels.	On the resilience of health systems: A methodological exploration across countries in the WHO African Region
Service delivery	The primary care (front line) facilities have the needed epidemiology and other technical skills to identify and isolate health threat	6.1. Governance and Management	6.1.2. Management of operations	6.1.2.2. Data informs decision-making, performance monitoring, and strategic planning at all levels.	Towards universal health coverage in the WHO African Region: assessing health system functionality, incorporating lessons from COVID-19
Service delivery	Mechanisms in place to ensure effective implementation of infection prevention and control in healthcare settings	6.1. Governance and Management	6.1.2. Management of operations	6.1.2.2. Data informs decision-making, performance monitoring, and strategic planning at all levels.	Resilience of primary healthcare system across low- and middle-income countries during COVID-19 pandemic: a scoping review
Service delivery	Health officials have conducted resource-mapping exercises to identify the geographic location of all healthcare facilities within their jurisdiction, and is familiar with the level of care each facility is able to provide	6.1. Governance and Management	6.1.2. Management of operations	6.1.2.2. Data informs decision-making, performance monitoring, and strategic planning at all levels.	A checklist to improve health system resilience to infectious disease outbreaks and natural hazards
Service delivery	Health officials currently offer incentives for collaboration on emergency preparedness efforts	6.1. Governance and Management	6.1.2. Management of operations	6.1.2.2. Data informs decision-making, performance monitoring, and strategic planning at all levels.	A checklist to improve health system resilience to infectious disease outbreaks and natural hazards
Service delivery	Health officials currently include health facilities in exercises or simulations pertaining to emergencies	6.1. Governance and Management	6.1.2. Management of operations	6.1.2.2. Data informs decision-making, performance monitoring, and strategic planning at all levels.	A checklist to improve health system resilience to infectious disease outbreaks and natural hazards
Service delivery	During emergencies, health officials are able to keep facilities apprised of diseases that may affect them, and are able to facilitate bi-directional information flow between themselves and facilities	6.1. Governance and Management	6.1.2. Management of operations	6.1.2.2. Data informs decision-making, performance monitoring, and strategic planning at all levels.	A checklist to improve health system resilience to infectious disease outbreaks and natural hazards
Medical products, vaccines and technologies	There are no stock outs in the past 1 year for common supportive drugs and supplies used in emergency (Oxygen, analgesics, PPEs, and other supportive supplies)	4.2.Supply Chain management	4.2.2. Timeliness of Distribution to Respond to Health Emergencies	4.2.2.1. Timely distribution to meet needs and system in place to ensure products are available in the event of a health emergency	Towards universal health coverage in the WHO African Region: assessing health system functionality, incorporating lessons from COVID-19
Service delivery	Health officials provide guidance and updates on diagnostics and treatment as informed by ongoing data collection during emergencies	6.1. Governance and Management	6.1.2. Management of operations	6.1.2.2. Data informs decision-making, performance monitoring, and strategic planning at all levels.	A checklist to improve health system resilience to infectious disease outbreaks and natural hazards
Service delivery	Health officials currently have the ability to aggregate and review resource shortages (medicines, and vaccines, equipment, supplies) reported by health facilities	6.1. Governance and Management	6.1.2. Management of operations	6.1.2.2. Data informs decision-making, performance monitoring, and strategic planning at all levels.	A checklist to improve health system resilience to infectious disease outbreaks and natural hazards
Service delivery	The primary care (front line) facilities have the needed technical capacity to identify and isolate a health threat (Self-Regulation)	6.1. Governance and Management	6.1.2. Management of operations	6.1.2.2. Data informs decision-making, performance monitoring, and strategic planning at all levels.	On the resilience of health systems: A methodological exploration across countries in the WHO African Region
Service delivery	First-contact access: How far do you regularly travel to receive primary care?	6.2. Access and Availability	6.1.1. Service delivery planning employs balanced service delivery	6.2.2.1. Health services are brought closer to people	Better Measurement for Performance Improvement in Low- and Middle-Income Countries: The Primary Health Care Performance Initiative (PHCPI) Experience of Conceptual Framework Development and Indicator Selection
Service delivery	Diagnostic accuracy	6.1. Governance and Management	6.1.2. Management of operations	6.1.2.3. Systems in place to ensure quality of service at facilities level	Better Measurement for Performance Improvement in Low- and Middle-Income Countries: The Primary Health Care Performance Initiative (PHCPI) Experience of Conceptual Framework Development and Indicator Selection
Service delivery	Presence of client feedback system	6.1. Governance and Management	6.1.2. Management of operations	6.1.2.3. Systems in place to ensure quality of service at facilities level	Better Measurement for Performance Improvement in Low- and Middle-Income Countries: The Primary Health Care Performance Initiative (PHCPI) Experience of Conceptual Framework Development and Indicator Selection
Service delivery	Facility participates in national/facility service level accreditation/certification program and is currently certified	6.1. Governance and Management	6.1.2. Management of operations	6.1.2.3. Systems in place to ensure quality of service at facilities level	Better Measurement for Performance Improvement in Low- and Middle-Income Countries: The Primary Health Care Performance Initiative (PHCPI) Experience of Conceptual Framework Development and Indicator Selection
Service delivery	System for eliciting and reviewing client opinion	6.1. Governance and Management	6.1.2. Management of operations	6.1.2.3. Systems in place to ensure quality of service at facilities level	Using the World Health Organization health system building blocks through survey of healthcare professionals to determine the performance of public healthcare facilities
Service delivery	Improved treatment and respect to patients	6.1. Governance and Management	6.1.2. Management of operations	6.1.2.3. Systems in place to ensure quality of service at facilities level	Using the World Health Organization health system building blocks through survey of healthcare professionals to determine the performance of public healthcare facilities
Service delivery	on-time services	6.1. Governance and Management	6.1.2. Management of operations	6.1.2.3. Systems in place to ensure quality of service at facilities level	Using the World Health Organization health system building blocks through survey of healthcare professionals to determine the performance of public healthcare facilities
Service delivery	Patient satisfaction	6.1. Governance and Management	6.1.2. Management of operations	6.1.2.3. Systems in place to ensure quality of service at facilities level	Using the World Health Organization health system building blocks through survey of healthcare professionals to determine the performance of public healthcare facilities
Service delivery	Standard precautions for infection prevention and control (%)	6.1. Governance and Management	6.1.2. Management of operations	6.1.2.3. Systems in place to ensure quality of service at facilities level	Towards universal health coverage in the WHO African Region: assessing health system functionality, incorporating lessons from COVID-19
Service delivery	Satisfaction with basic health services (%)	6.1. Governance and Management	6.1.2. Management of operations	6.1.2.3. Systems in place to ensure quality of service at facilities level	Towards universal health coverage in the WHO African Region: assessing health system functionality, incorporating lessons from COVID-19
Service delivery	Health facilities have functional therapeutics committees that are monitoring rare / uncommon events impacting service provision	6.1. Governance and Management	6.1.2. Management of operations	6.1.2.3. Systems in place to ensure quality of service at facilities level	Towards universal health coverage in the WHO African Region: assessing health system functionality, incorporating lessons from COVID-19
Service delivery	Case management procedures are implemented for IHR relevant hazards	6.1. Governance and Management	6.1.2. Management of operations	6.1.2.3. Systems in place to ensure quality of service at facilities level	Towards universal health coverage in the WHO African Region: assessing health system functionality, incorporating lessons from COVID-19
Service delivery	Infection prevention and control (IPC) is established at national and hospital levels	6.1. Governance and Management	6.1.2. Management of operations	6.1.2.3. Systems in place to ensure quality of service at facilities level	Towards universal health coverage in the WHO African Region: assessing health system functionality, incorporating lessons from COVID-19
Service delivery	Able to identify, isolate health threats to protect patients and providers (self-regulating )	6.1. Governance and Management	6.1.2. Management of operations	6.1.2.3. Systems in place to ensure quality of service at facilities level	Beyond the crisis: did the Ebola epidemic improve resilience of Liberia’s health system?
Service delivery	provides high quality services to patients (diverse)	6.1. Governance and Management	6.1.2. Management of operations	6.1.2.3. Systems in place to ensure quality of service at facilities level	Beyond the crisis: did the Ebola epidemic improve resilience of Liberia’s health system?
Service delivery	An estimate of the overall quality of the healthcare system, healthcare professionals, equipment, staff, doctors, costs	6.1. Governance and Management	6.1.2. Management of operations	6.1.2.3. Systems in place to ensure quality of service at facilities level	Evaluation of health system resilience in 60 countries based on their responses to COVID-19
Service delivery	Health officials currently provide national guidelines for facilities to follow regarding infection control, including procedures for donning and doffing personal protective equipment, handling waste, and caring for high-risk or contagious patients, and these are consistent with the laws of the nation	6.1. Governance and Management	6.1.2. Management of operations	6.1.2.3. Systems in place to ensure quality of service at facilities level	A checklist to improve health system resilience to infectious disease outbreaks and natural hazards
Service delivery	Proportion of children 0–59 months with cough and fast/difficult breathing in the 2 weeks before the survey who were treated with an appropriate antibiotic (as per national guidelines)	6.1. Governance and Management	6.1.2. Management of operations	6.1.2.3. Systems in place to ensure quality of service at facilities level	Liberia health system’s journey to long-term recovery and resilience post-Ebola: a case study of an exemplary multi-year collaboration
Service delivery	Number of health facilities in Liberia reporting adverse events in care delivery	6.1. Governance and Management	6.1.2. Management of operations	6.1.2.3. Systems in place to ensure quality of service at facilities level	Measuring health system resilience in a highly fragile nation during protracted conflict: South Sudan 2011-15
Health workforce	Percent of facilities that did not report moderate to severe challenges with human resources during the pandemic	2.1. Health workforce planning	2.1.2. Surge Capacity	2.1.2.1 There is a functional, fully funded roster of rapid response teams for emergency response	Resilience of front-line facilities during COVID-19: evidence from cross-sectional rapid surveys in eight low- and middle-income countries
Service delivery	Difference between first and fifth wealth quintiles for under five mortality	6.2. Access and Availability	6.2.1. Health Benefit Package	6.2.1.2. All elements or components of the health benefit package are being executed or operationalized within a health system.	Better Measurement for Performance Improvement in Low- and Middle-Income Countries: The Primary Health Care Performance Initiative (PHCPI) Experience of Conceptual Framework Development and Indicator Selection
Service delivery	Proportion of children 0–59 months with fever in the last 2 weeks who were treated with an appropriate anti-malarial (as per national guidelines)	6.1. Governance and Management	6.1.2. Management of operations	6.1.2.3. Systems in place to ensure quality of service at facilities level	Measuring health system resilience in a highly fragile nation during protracted conflict: South Sudan 2011-15
Service delivery	Infection prevention and control (IPC) is established at national and hospital levels (IHR)	6.1. Governance and Management	6.1.2. Management of operations	6.1.2.3. Systems in place to ensure quality of service at facilities level	On the resilience of health systems: A methodological exploration across countries in the WHO African Region
Service delivery	Lower respiratory tract infection mortality rate (per 100 00)	6.1. Governance and Management	6.1.2. Management of operations	6.1.2.3. Systems in place to ensure quality of service at facilities level	Health system functionality in a low-income country in the midst of conflict: the case of Yemen
Service delivery	mode of communications suitable to patients	6.1. Governance and Management	6.1.2. Management of operations	6.1.2.3. Systems in place to ensure quality of service at facilities level	Using the World Health Organization health system building blocks through survey of healthcare professionals to determine the performance of public healthcare facilities
Service delivery	The facility has plans for optimizing clinical care for patients with high consequence infectious diseases (HCID; e.g., viral hemorrhagic fevers), given anticipated resource shortages (including plans for pediatric and obstetric patients)	6.1. Governance and Management	6.1.2. Management of operations	6.1.2.3. Systems in place to ensure quality of service at facilities level	A checklist to improve health system resilience to infectious disease outbreaks and natural hazards
Service delivery	This facility currently has a process for monitoring patients and healthcare workers for signs of infection based on symptoms and exposure	6.1. Governance and Management	6.1.2. Management of operations	6.1.2.3. Systems in place to ensure quality of service at facilities level	A checklist to improve health system resilience to infectious disease outbreaks and natural hazards
Service delivery	This facility currently has protocols for screening patients for symptoms and conducting medical and travel history that would indicate possible exposure or infection	6.1. Governance and Management	6.1.2. Management of operations	6.1.2.3. Systems in place to ensure quality of service at facilities level	A checklist to improve health system resilience to infectious disease outbreaks and natural hazards
Service delivery	Management of maternal/neonatal complications	6.1. Governance and Management	6.1.2. Management of operations	6.1.2.3. Systems in place to ensure quality of service at facilities level	Better Measurement for Performance Improvement in Low- and Middle-Income Countries: The Primary Health Care Performance Initiative (PHCPI) Experience of Conceptual Framework Development and Indicator Selection
Service delivery	Treatment accuracy	6.1. Governance and Management	6.1.2. Management of operations	6.1.2.3. Systems in place to ensure quality of service at facilities level	Better Measurement for Performance Improvement in Low- and Middle-Income Countries: The Primary Health Care Performance Initiative (PHCPI) Experience of Conceptual Framework Development and Indicator Selection
Service delivery	Standard precautions for infection prevention and control	6.1. Governance and Management	6.1.2. Management of operations	6.1.2.3. Systems in place to ensure quality of service at facilities level	Better Measurement for Performance Improvement in Low- and Middle-Income Countries: The Primary Health Care Performance Initiative (PHCPI) Experience of Conceptual Framework Development and Indicator Selection
Service delivery	Informational continuity (3 indicators): At your primary health care facility, does your regular health care provider always or often know important information about your medical history? At your primary health care facility, were there times when the health care provider you were seeing did not have access to your most recent test or exam results? At your primary health care facility, is there …	6.1. Governance and Management	6.1.2. Management of operations	6.1.2.3. Systems in place to ensure quality of service at facilities level	Better Measurement for Performance Improvement in Low- and Middle-Income Countries: The Primary Health Care Performance Initiative (PHCPI) Experience of Conceptual Framework Development and Indicator Selection
Service delivery	Management continuity (3 indicators) : Thinking about all the persons you saw in different places, is there one person who ensures follow-up of your health care? Is the person who ensures your follow-up aware of health care you receive from others? Is the person who ensures your follow-up in contact with other providers about your health care?	6.1. Governance and Management	6.1.2. Management of operations	6.1.2.3. Systems in place to ensure quality of service at facilities level	Better Measurement for Performance Improvement in Low- and Middle-Income Countries: The Primary Health Care Performance Initiative (PHCPI) Experience of Conceptual Framework Development and Indicator Selection
Service delivery	Does your regular health care provider know when you have visited a specialist?	6.1. Governance and Management	6.1.2. Management of operations	6.1.2.3. Systems in place to ensure quality of service at facilities level	Better Measurement for Performance Improvement in Low- and Middle-Income Countries: The Primary Health Care Performance Initiative (PHCPI) Experience of Conceptual Framework Development and Indicator Selection
Service delivery	Does your regular health care provider help coordinate referrals to a specialist?	6.1. Governance and Management	6.1.2. Management of operations	6.1.2.3. Systems in place to ensure quality of service at facilities level	Better Measurement for Performance Improvement in Low- and Middle-Income Countries: The Primary Health Care Performance Initiative (PHCPI) Experience of Conceptual Framework Development and Indicator Selection
Service delivery	Does your regular health care provider get a report from the specialist about the visit?	6.1. Governance and Management	6.1.2. Management of operations	6.1.2.3. Systems in place to ensure quality of service at facilities level	Better Measurement for Performance Improvement in Low- and Middle-Income Countries: The Primary Health Care Performance Initiative (PHCPI) Experience of Conceptual Framework Development and Indicator Selection
Service delivery	Have you often or always felt that your care was well coordinated among different providers?	6.1. Governance and Management	6.1.2. Management of operations	6.1.2.3. Systems in place to ensure quality of service at facilities level	Better Measurement for Performance Improvement in Low- and Middle-Income Countries: The Primary Health Care Performance Initiative (PHCPI) Experience of Conceptual Framework Development and Indicator Selection
Service delivery	Diabetes and raised blood glucose	6.1. Governance and Management	6.1.2. Management of operations	6.1.2.3. Systems in place to ensure quality of service at facilities level	Better Measurement for Performance Improvement in Low- and Middle-Income Countries: The Primary Health Care Performance Initiative (PHCPI) Experience of Conceptual Framework Development and Indicator Selection
Service delivery	Reliably meets all or most of people's health needs over time (diverse)	6.1. Governance and Management	6.1.2. Management of operations	6.1.2.5. Equitable distribution of health facilities to support Universal Health Coverage (UHC) by enhancing access to essential services and reducing disparities in access, regardless of location.	Beyond the crisis: did the Ebola epidemic improve resilience of Liberia’s health system?
Service delivery	Health officials have established relationships with NGOs that might provide assistance during emergencies	6.1. Governance and Management	6.1.2. Management of operations	6.1.2.5. Equitable distribution of health facilities to support Universal Health Coverage (UHC) by enhancing access to essential services and reducing disparities in access, regardless of location.	A checklist to improve health system resilience to infectious disease outbreaks and natural hazards
Service delivery	Having a package of services that is properly resourced, organized and distributed	6.2. Access and Availability	6.2.1. Health Benefit Package	6.2.1.2. All elements or components of the health benefit package are being executed or operationalized within a health system.	Resilience of primary healthcare system across low- and middle-income countries during COVID-19 pandemic: a scoping review
Service delivery	Identifying vulnerable population groups (ensuring that appropriate data are collected) and ensuring adequate access to services	6.2. Access and Availability	6.2.1. Health Benefit Package	6.2.1.2. All elements or components of the health benefit package are being executed or operationalized within a health system.	Resilience of primary healthcare system across low- and middle-income countries during COVID-19 pandemic: a scoping review
Service delivery	Health facilities have micro-plans, to take essential services to hard to reach populations in their areas of responsibility	6.2. Access and Availability	6.2.1. Health Benefit Package	6.2.1.2. All elements or components of the health benefit package are being executed or operationalized within a health system.	Towards universal health coverage in the WHO African Region: assessing health system functionality, incorporating lessons from COVID-19
Service delivery	Health facilities are aware of the range of essential services they are expected to provide, and have plans to expand their capacity to provide these	6.2. Access and Availability	6.2.1. Health Benefit Package	6.2.1.2. All elements or components of the health benefit package are being executed or operationalized within a health system.	Towards universal health coverage in the WHO African Region: assessing health system functionality, incorporating lessons from COVID-19
Service delivery	the number of public and private health institutions established by law to carry out activities of diagnosis and treatment of diseases	6.2. Access and Availability	6.2.1. Health Benefit Package	6.2.1.2. All elements or components of the health benefit package are being executed or operationalized within a health system.	Evaluation of health system resilience in 60 countries based on their responses to COVID-19
Service delivery	There is a clear strategy to scale up the provision of essential services not currently being provided (diversity)	6.2. Access and Availability	6.2.1. Health Benefit Package	6.2.1.2. All elements or components of the health benefit package are being executed or operationalized within a health system.	On the resilience of health systems: A methodological exploration across countries in the WHO African Region
Service delivery	Implementation of essential service package	6.2. Access and Availability	6.2.1. Health Benefit Package	6.2.1.2. All elements or components of the health benefit package are being executed or operationalized within a health system.	Health system functionality in a low-income country in the midst of conflict: the case of Yemen
Service delivery	This facility provides mental health, pediatric, and obstetric services	6.2. Access and Availability	6.2.1. Health Benefit Package	6.2.1.2. All elements or components of the health benefit package are being executed or operationalized within a health system.	A checklist to improve health system resilience to infectious disease outbreaks and natural hazards
Service delivery	Stunting among children aged 5 and under	6.2. Access and Availability	6.2.1. Health Benefit Package	6.2.1.2. All elements or components of the health benefit package are being executed or operationalized within a health system.	Health system functionality in a low-income country in the midst of conflict: the case of Yemen
Service delivery	Percent of facilities that had continuous access to water and electricity the week before the survey and had access to safe and isolated transportation for patients with COVID-19	6.1. Governance and Management	6.1.2. Management of operations	6.1.2.5. Equitable distribution of health facilities to support Universal Health Coverage (UHC) by enhancing access to essential services and reducing disparities in access, regardless of location.	Resilience of front-line facilities during COVID-19: evidence from cross-sectional rapid surveys in eight low- and middle-income countries
Service delivery	Facilities with clean water, electricity, sanitation	6.1. Governance and Management	6.1.2. Management of operations	6.1.2.5. Equitable distribution of health facilities to support Universal Health Coverage (UHC) by enhancing access to essential services and reducing disparities in access, regardless of location.	Better Measurement for Performance Improvement in Low- and Middle-Income Countries: The Primary Health Care Performance Initiative (PHCPI) Experience of Conceptual Framework Development and Indicator Selection
Service delivery	Transformative capacity: the ability of health system actors to transform and reorient the functions and structure of the health system to respond to a changing environment	6.1. Governance and Management	6.1.2. Management of operations	6.1.2.5. Equitable distribution of health facilities to support Universal Health Coverage (UHC) by enhancing access to essential services and reducing disparities in access, regardless of location.	Resilience of primary healthcare system across low- and middle-income countries during COVID-19 pandemic: a scoping review
Service delivery	Adaptive capacity: determines the health system actors to adapt to the crisis to deliver the same level of healthcare services with fewer and/or different resources	6.2. Access and Availability	6.2.1. Health Benefit Package	6.2.1.2. All elements or components of the health benefit package are being executed or operationalized within a health system.	Resilience of primary healthcare system across low- and middle-income countries during COVID-19 pandemic: a scoping review
Service delivery	Absorptive capacity: PHC continues to deliver the same level (quantity, quality and equity) of basic healthcare services and protection to populations	6.2. Access and Availability	6.2.1. Health Benefit Package	6.2.1.2. All elements or components of the health benefit package are being executed or operationalized within a health system.	Resilience of primary healthcare system across low- and middle-income countries during COVID-19 pandemic: a scoping review
Service delivery	Number of public health facilities (per square kilometer)	6.1. Governance and Management	6.1.2. Management of operations	6.1.2.5. Equitable distribution of health facilities to support Universal Health Coverage (UHC) by enhancing access to essential services and reducing disparities in access, regardless of location.	Towards universal health coverage in the WHO African Region: assessing health system functionality, incorporating lessons from COVID-19
Service delivery	Number of hospital beds (per 1000 population)	6.1. Governance and Management	6.1.2. Management of operations	6.1.2.5. Equitable distribution of health facilities to support Universal Health Coverage (UHC) by enhancing access to essential services and reducing disparities in access, regardless of location.	Towards universal health coverage in the WHO African Region: assessing health system functionality, incorporating lessons from COVID-19
Service delivery	Evidence of continuing essential public health function	6.2. Access and Availability	6.2.1. Health Benefit Package	6.2.1.2. All elements or components of the health benefit package are being executed or operationalized within a health system.	Resilience of primary healthcare system across low- and middle-income countries during COVID-19 pandemic: a scoping review
Service delivery	Having strong (or strengthening) primary health in maintaining non-COVID essential services to catchment populations	6.2. Access and Availability	6.2.1. Health Benefit Package	6.2.1.2. All elements or components of the health benefit package are being executed or operationalized within a health system.	Resilience of primary healthcare system across low- and middle-income countries during COVID-19 pandemic: a scoping review
Service delivery	Health facilities are utilizing multiple service delivery approaches: fixed sites, outreaches, mobile clinics, e-referrals, etc to take services to their population	6.2. Access and Availability	6.2.1. Health Benefit Package	6.2.1.2. All elements or components of the health benefit package are being executed or operationalized within a health system.	Towards universal health coverage in the WHO African Region: assessing health system functionality, incorporating lessons from COVID-19
Service delivery	Having strong (or strengthening) public health capacity (with a system to find, test, trace, isolate, and support	6.2. Access and Availability	6.2.1. Health Benefit Package	6.2.1.2. All elements or components of the health benefit package are being executed or operationalized within a health system.	Resilience of primary healthcare system across low- and middle-income countries during COVID-19 pandemic: a scoping review
Service delivery	Laboratory services are available to test for priority health threat	6.2. Access and Availability	6.2.1. Health Benefit Package	6.2.1.2. All elements or components of the health benefit package are being executed or operationalized within a health system.	Towards universal health coverage in the WHO African Region: assessing health system functionality, incorporating lessons from COVID-19
Service delivery	System for collection, packaging and transport of clinical specimens is established	6.2. Access and Availability	6.2.1. Health Benefit Package	6.2.1.2. All elements or components of the health benefit package are being executed or operationalized within a health system.	Towards universal health coverage in the WHO African Region: assessing health system functionality, incorporating lessons from COVID-19
Service delivery	Laboratory biosafety and laboratory biosecurity (Biorisk management ) practices are in place.	6.2. Access and Availability	6.2.1. Health Benefit Package	6.2.1.2. All elements or components of the health benefit package are being executed or operationalized within a health system.	Towards universal health coverage in the WHO African Region: assessing health system functionality, incorporating lessons from COVID-19
Service delivery	Laboratory data management and reporting is established	6.1. Governance and Management	6.1.2. Management of operations	6.1.2.2. Data informs decision-making, performance monitoring, and strategic planning at all levels.	Towards universal health coverage in the WHO African Region: assessing health system functionality, incorporating lessons from COVID-19
Service delivery	Demand for family planning satisfied by modern methods	6.2. Access and Availability	6.2.1. Health Benefit Package	6.2.1.2. All elements or components of the health benefit package are being executed or operationalized within a health system.	Towards universal health coverage in the WHO African Region: assessing health system functionality, incorporating lessons from COVID-19
Service delivery	DTP3-Measles Containing Vaccine (MCV) drop out	6.2. Access and Availability	6.2.1. Health Benefit Package	6.2.1.2. All elements or components of the health benefit package are being executed or operationalized within a health system.	Towards universal health coverage in the WHO African Region: assessing health system functionality, incorporating lessons from COVID-19
Service delivery	General service readiness (%)	6.2. Access and Availability	6.2.1. Health Benefit Package	6.2.1.2. All elements or components of the health benefit package are being executed or operationalized within a health system.	Towards universal health coverage in the WHO African Region: assessing health system functionality, incorporating lessons from COVID-19
Service delivery	Antenatal Care (ANC) 1– 4 drop out	6.2. Access and Availability	6.2.1. Health Benefit Package	6.2.1.2. All elements or components of the health benefit package are being executed or operationalized within a health system.	Towards universal health coverage in the WHO African Region: assessing health system functionality, incorporating lessons from COVID-19
Service delivery	Antenatal coverage (% receiving 4+ visits)	6.2. Access and Availability	6.2.1. Health Benefit Package	6.2.1.2. All elements or components of the health benefit package are being executed or operationalized within a health system.	Towards universal health coverage in the WHO African Region: assessing health system functionality, incorporating lessons from COVID-19
Service delivery	Coordinating mechanism for laboratory services is established	6.1. Governance and Management	6.1.1. Service delivery planning employs balanced service delivery	6.1.1.1. Service delivery planning is data-informed, employs balanced service delivery, and ensures continuity of services during emergencies	Towards universal health coverage in the WHO African Region: assessing health system functionality, incorporating lessons from COVID-19
Service delivery	Diptheria, Pertusis, Tetanus (DP) containing vaccine, dose 1– 3 drop out	6.2. Access and Availability	6.2.1. Health Benefit Package	6.2.1.2. All elements or components of the health benefit package are being executed or operationalized within a health system.	Towards universal health coverage in the WHO African Region: assessing health system functionality, incorporating lessons from COVID-19
Service delivery	Percentage of facilities in project sites with a dedicated IPC focal person	6.2. Access and Availability	6.2.1. Health Benefit Package	6.2.1.2. All elements or components of the health benefit package are being executed or operationalized within a health system.	Liberia health system’s journey to long-term recovery and resilience post-Ebola: a case study of an exemplary multi-year collaboration
Service delivery	can address many types of health problems in primary care (diverse)	6.2. Access and Availability	6.2.1. Health Benefit Package	6.2.1.2. All elements or components of the health benefit package are being executed or operationalized within a health system.	Beyond the crisis: did the Ebola epidemic improve resilience of Liberia’s health system?
Service delivery	Number of outpatient visits	6.2. Access and Availability	6.2.2. Service availability and readiness	6.2.2.2. Proportion of people in the most vulnerable areas provided with essential health services	COVID-19 and resilience of healthcare systems in ten countries
Service delivery	Total number of emergency unit attendances	6.2. Access and Availability	6.2.2. Service availability and readiness	6.2.2.2. Proportion of people in the most vulnerable areas provided with essential health services	COVID-19 and resilience of healthcare systems in ten countries
Service delivery	Number of inpatient admissions	6.2. Access and Availability	6.2.2. Service availability and readiness	6.2.2.2. Proportion of people in the most vulnerable areas provided with essential health services	COVID-19 and resilience of healthcare systems in ten countries
Service delivery	Total new and repeat acceptors disaggregated by method	6.2. Access and Availability	6.2.1. Health Benefit Package	6.2.1.2. All elements or components of the health benefit package are being executed or operationalized within a health system.	COVID-19 and resilience of healthcare systems in ten countries
Service delivery	Number of pregnant women that received ANC at least once by maternal age	6.2. Access and Availability	6.2.2. Service availability and readiness	6.2.2.2. Proportion of people in the most vulnerable areas provided with essential health services	COVID-19 and resilience of healthcare systems in ten countries
Service delivery	Total number of births attended by skilled health personnel	6.2. Access and Availability	6.2.2. Service availability and readiness	6.2.2.2. Proportion of people in the most vulnerable areas provided with essential health services	COVID-19 and resilience of healthcare systems in ten countries
Service delivery	Number of women having given birth by caesarean section	6.2. Access and Availability	6.2.2. Service availability and readiness	6.2.2.2. Proportion of people in the most vulnerable areas provided with essential health services	COVID-19 and resilience of healthcare systems in ten countries
Service delivery	Number of postnatal visits within 7 days of delivery	6.2. Access and Availability	6.2.1. Health Benefit Package	6.2.1.2. All elements or components of the health benefit package are being executed or operationalized within a health system.	COVID-19 and resilience of healthcare systems in ten countries
Service delivery	Number of children treated for diarrhea with ORS only	6.2. Access and Availability	6.2.1. Health Benefit Package	6.2.1.2. All elements or components of the health benefit package are being executed or operationalized within a health system.	COVID-19 and resilience of healthcare systems in ten countries
Service delivery	Total number of children <5yrs screened for acute malnutrition	6.2. Access and Availability	6.2.1. Health Benefit Package	6.2.1.2. All elements or components of the health benefit package are being executed or operationalized within a health system.	COVID-19 and resilience of healthcare systems in ten countries
Service delivery	Number of children under one year who have received third dose of pentavalent vaccine	6.2. Access and Availability	6.2.1. Health Benefit Package	6.2.1.2. All elements or components of the health benefit package are being executed or operationalized within a health system.	COVID-19 and resilience of healthcare systems in ten countries
Service delivery	Number of children under one year of age who have received third dose of pneumococcal vaccine	6.2. Access and Availability	6.2.1. Health Benefit Package	6.2.1.2. All elements or components of the health benefit package are being executed or operationalized within a health system.	COVID-19 and resilience of healthcare systems in ten countries
Service delivery	Number of children under one year of age who have received 2nd dose of Rotavirus vaccine	6.2. Access and Availability	6.2.1. Health Benefit Package	6.2.1.2. All elements or components of the health benefit package are being executed or operationalized within a health system.	COVID-19 and resilience of healthcare systems in ten countries
Service delivery	Number of children under one year who received first dose of measles vaccine	6.2. Access and Availability	6.2.1. Health Benefit Package	6.2.1.2. All elements or components of the health benefit package are being executed or operationalized within a health system.	COVID-19 and resilience of healthcare systems in ten countries
Service delivery	Number of children received all vaccine doses before 1st birthday	6.2. Access and Availability	6.2.1. Health Benefit Package	6.2.1.2. All elements or components of the health benefit package are being executed or operationalized within a health system.	COVID-19 and resilience of healthcare systems in ten countries
Service delivery	Number of adults and children who are currently on ART	6.2. Access and Availability	6.2.1. Health Benefit Package	6.2.1.2. All elements or components of the health benefit package are being executed or operationalized within a health system.	COVID-19 and resilience of healthcare systems in ten countries
Service delivery	the number of beds in public and private health facilities where patients are admitted for inpatient treatment	6.2. Access and Availability	6.2.1. Health Benefit Package	6.2.1.2. All elements or components of the health benefit package are being executed or operationalized within a health system.	Evaluation of health system resilience in 60 countries based on their responses to COVID-19
Service delivery	Counting age-standardized and risk-standardized mortality rates for 32 causes of illness considered appropriate for healthcare, measured on a scale from 0 (worst) to 100 (best) mortality rates	6.2. Access and Availability	6.2.1. Health Benefit Package	6.2.1.2. All elements or components of the health benefit package are being executed or operationalized within a health system.	Evaluation of health system resilience in 60 countries based on their responses to COVID-19
Service delivery	The coverage of essential services based on the capacity and access to services for reproductive, maternal, newborn and child health, communicable diseases, non-communicable diseases, and tracking interventions for the general and most-vulnerable populations	6.2. Access and Availability	6.2.1. Health Benefit Package	6.2.1.2. All elements or components of the health benefit package are being executed or operationalized within a health system.	Evaluation of health system resilience in 60 countries based on their responses to COVID-19
Service delivery	Health service supply pressure as the dynamics of a corresponding increase in the proportion of older people in the population due to a decrease in the number of younger people and an increase in the number of older people	6.1. Governance and Management	6.1.1. Service delivery planning employs balanced service delivery	6.1.1.1. Service delivery planning is data-informed, employs balanced service delivery, and ensures continuity of services during emergencies	Evaluation of health system resilience in 60 countries based on their responses to COVID-19
Service delivery	Number of children under 5 treated for pneumonia	6.2. Access and Availability	6.2.1. Health Benefit Package	6.2.1.2. All elements or components of the health benefit package are being executed or operationalized within a health system.	COVID-19 and resilience of healthcare systems in ten countries
Service delivery	Percentage of children under 12 months immunized against measles—MCV1 (MCV2)	6.2. Access and Availability	6.2.1. Health Benefit Package	6.2.1.2. All elements or components of the health benefit package are being executed or operationalized within a health system.	Health system functionality in a low-income country in the midst of conflict: the case of Yemen
Service delivery	Adult mortality from NCDs	6.2. Access and Availability	6.2.1. Health Benefit Package	6.2.1.2. All elements or components of the health benefit package are being executed or operationalized within a health system.	Better Measurement for Performance Improvement in Low- and Middle-Income Countries: The Primary Health Care Performance Initiative (PHCPI) Experience of Conceptual Framework Development and Indicator Selection
Service delivery	Diabetes control	6.2. Access and Availability	6.2.1. Health Benefit Package	6.2.1.2. All elements or components of the health benefit package are being executed or operationalized within a health system.	Better Measurement for Performance Improvement in Low- and Middle-Income Countries: The Primary Health Care Performance Initiative (PHCPI) Experience of Conceptual Framework Development and Indicator Selection
Service delivery	During an emergency, health facilities can be incorporated into an emergency operations center (EOC) stood up by health officials	6.2. Access and Availability	6.2.2. Service availability and readiness	6.2.2.2. Proportion of people in the most vulnerable areas provided with essential health services	A checklist to improve health system resilience to infectious disease outbreaks and natural hazards
Service delivery	Health officials are familiar with and have the authority to implement command structures, which should include networks of healthcare facilities	6.1. Governance and Management	6.1.2. Management of operations	6.1.2.2. Data informs decision-making, performance monitoring, and strategic planning at all levels.	A checklist to improve health system resilience to infectious disease outbreaks and natural hazards
Service delivery	Health officials have designated which facilities should have the capacities to care for patients with high consequence infectious diseases, including consideration of inter-facility transport for patients requiring special treatment or handling	6.1. Governance and Management	6.1.1. Service delivery planning employs balanced service delivery	6.1.1.1. Service delivery planning is data-informed, employs balanced service delivery, and ensures continuity of services during emergencies	A checklist to improve health system resilience to infectious disease outbreaks and natural hazards
Service delivery	Health officials currently have plans (and have disseminated these plans) for collecting information on the number of nosocomial infections that occur during outbreaks	6.1. Governance and Management	6.1.2. Management of operations	6.1.2.2. Data informs decision-making, performance monitoring, and strategic planning at all levels.	A checklist to improve health system resilience to infectious disease outbreaks and natural hazards
Service delivery	Health center and health post density	6.1. Governance and Management	6.1.2. Management of operations	6.1.2.5. Equitable distribution of health facilities to support Universal Health Coverage (UHC) by enhancing access to essential services and reducing disparities in access, regardless of location.	Better Measurement for Performance Improvement in Low- and Middle-Income Countries: The Primary Health Care Performance Initiative (PHCPI) Experience of Conceptual Framework Development and Indicator Selection
Service delivery	Total density per 100,000 population, health posts	6.1. Governance and Management	6.1.2. Management of operations	6.1.2.5. Equitable distribution of health facilities to support Universal Health Coverage (UHC) by enhancing access to essential services and reducing disparities in access, regardless of location.	Better Measurement for Performance Improvement in Low- and Middle-Income Countries: The Primary Health Care Performance Initiative (PHCPI) Experience of Conceptual Framework Development and Indicator Selection
Service delivery	Total density per 100,000 population district and rural hospitals	6.1. Governance and Management	6.1.2. Management of operations	6.1.2.5. Equitable distribution of health facilities to support Universal Health Coverage (UHC) by enhancing access to essential services and reducing disparities in access, regardless of location.	Better Measurement for Performance Improvement in Low- and Middle-Income Countries: The Primary Health Care Performance Initiative (PHCPI) Experience of Conceptual Framework Development and Indicator Selection
Service delivery	Dropout rate first to third DTP3 vaccination	6.2. Access and Availability	6.2.1. Health Benefit Package	6.2.1.2. All elements or components of the health benefit package are being executed or operationalized within a health system.	Better Measurement for Performance Improvement in Low- and Middle-Income Countries: The Primary Health Care Performance Initiative (PHCPI) Experience of Conceptual Framework Development and Indicator Selection
Service delivery	Dropout rate first to fourth antenatal visit	6.2. Access and Availability	6.2.1. Health Benefit Package	6.2.1.2. All elements or components of the health benefit package are being executed or operationalized within a health system.	Better Measurement for Performance Improvement in Low- and Middle-Income Countries: The Primary Health Care Performance Initiative (PHCPI) Experience of Conceptual Framework Development and Indicator Selection
Service delivery	Treatment success rate for new TB cases	6.2. Access and Availability	6.2.1. Health Benefit Package	6.2.1.2. All elements or components of the health benefit package are being executed or operationalized within a health system.	Better Measurement for Performance Improvement in Low- and Middle-Income Countries: The Primary Health Care Performance Initiative (PHCPI) Experience of Conceptual Framework Development and Indicator Selection
Service delivery	care-seeking for symptoms of pneumonia	6.2. Access and Availability	6.2.1. Health Benefit Package	6.2.1.2. All elements or components of the health benefit package are being executed or operationalized within a health system.	Better Measurement for Performance Improvement in Low- and Middle-Income Countries: The Primary Health Care Performance Initiative (PHCPI) Experience of Conceptual Framework Development and Indicator Selection
Service delivery	Demand for family planning satisfied with modern method	6.2. Access and Availability	6.2.1. Health Benefit Package	6.2.1.2. All elements or components of the health benefit package are being executed or operationalized within a health system.	Better Measurement for Performance Improvement in Low- and Middle-Income Countries: The Primary Health Care Performance Initiative (PHCPI) Experience of Conceptual Framework Development and Indicator Selection
Service delivery	Antenatal care coverage	6.2. Access and Availability	6.2.1. Health Benefit Package	6.2.1.2. All elements or components of the health benefit package are being executed or operationalized within a health system.	Better Measurement for Performance Improvement in Low- and Middle-Income Countries: The Primary Health Care Performance Initiative (PHCPI) Experience of Conceptual Framework Development and Indicator Selection
Leadership and governance	A program for disinfection, decontamination and vector control is established (IHR)	1.1. Vision and strategic direction	1.1.2. Policies and Guidance Documents	1.1.2.1. Policies and guidelines cover all strategic priority areas	On the resilience of health systems: A methodological exploration across countries in the WHO African Region
Service delivery	skilled birth attendance	6.2. Access and Availability	6.2.1. Health Benefit Package	6.2.1.2. All elements or components of the health benefit package are being executed or operationalized within a health system.	Better Measurement for Performance Improvement in Low- and Middle-Income Countries: The Primary Health Care Performance Initiative (PHCPI) Experience of Conceptual Framework Development and Indicator Selection
Service delivery	DTP3 immunization coverage	6.2. Access and Availability	6.2.1. Health Benefit Package	6.2.1.2. All elements or components of the health benefit package are being executed or operationalized within a health system.	Better Measurement for Performance Improvement in Low- and Middle-Income Countries: The Primary Health Care Performance Initiative (PHCPI) Experience of Conceptual Framework Development and Indicator Selection
Service delivery	Children with diarrhea receiving appropriate treatment	6.2. Access and Availability	6.2.1. Health Benefit Package	6.2.1.2. All elements or components of the health benefit package are being executed or operationalized within a health system.	Better Measurement for Performance Improvement in Low- and Middle-Income Countries: The Primary Health Care Performance Initiative (PHCPI) Experience of Conceptual Framework Development and Indicator Selection
Service delivery	TB cases detected and cured	6.2. Access and Availability	6.2.1. Health Benefit Package	6.2.1.2. All elements or components of the health benefit package are being executed or operationalized within a health system.	Better Measurement for Performance Improvement in Low- and Middle-Income Countries: The Primary Health Care Performance Initiative (PHCPI) Experience of Conceptual Framework Development and Indicator Selection
Service delivery	people living with HIV receiving ART	6.2. Access and Availability	6.2.1. Health Benefit Package	6.2.1.2. All elements or components of the health benefit package are being executed or operationalized within a health system.	Health system performance assessment: a framework for policy analysis Irene Papanicolas, Dheepa Rajan, Marina Karanikolos, Agnes Soucat, Josep Figueras
Service delivery	ITN coverage for malaria prevention	6.2. Access and Availability	6.2.1. Health Benefit Package	6.2.1.2. All elements or components of the health benefit package are being executed or operationalized within a health system.	Better Measurement for Performance Improvement in Low- and Middle-Income Countries: The Primary Health Care Performance Initiative (PHCPI) Experience of Conceptual Framework Development and Indicator Selection
Service delivery	cervical cancer screening rate	6.2. Access and Availability	6.2.1. Health Benefit Package	6.2.1.2. All elements or components of the health benefit package are being executed or operationalized within a health system.	Better Measurement for Performance Improvement in Low- and Middle-Income Countries: The Primary Health Care Performance Initiative (PHCPI) Experience of Conceptual Framework Development and Indicator Selection
Service delivery	Hypertension control	6.2. Access and Availability	6.2.1. Health Benefit Package	6.2.1.2. All elements or components of the health benefit package are being executed or operationalized within a health system.	Better Measurement for Performance Improvement in Low- and Middle-Income Countries: The Primary Health Care Performance Initiative (PHCPI) Experience of Conceptual Framework Development and Indicator Selection
Service delivery	Caseload per provider (daily)	6.2. Access and Availability	6.2.1. Health Benefit Package	6.2.1.2. All elements or components of the health benefit package are being executed or operationalized within a health system.	Better Measurement for Performance Improvement in Low- and Middle-Income Countries: The Primary Health Care Performance Initiative (PHCPI) Experience of Conceptual Framework Development and Indicator Selection
Service delivery	Deliveries attended by qualified medical staff (percentage)	6.2. Access and Availability	6.2.1. Health Benefit Package	6.2.1.2. All elements or components of the health benefit package are being executed or operationalized within a health system.	Health system functionality in a low-income country in the midst of conflict: the case of Yemen
Service delivery	Women receiving antenatal care (four or more visits) (percentage)	6.2. Access and Availability	6.2.1. Health Benefit Package	6.2.1.2. All elements or components of the health benefit package are being executed or operationalized within a health system.	Health system functionality in a low-income country in the midst of conflict: the case of Yemen
Service delivery	Patient indiscrimination	6.1. Governance and Management	6.1.1. Service delivery planning employs balanced service delivery	6.1.1.1. Service delivery planning is data-informed, employs balanced service delivery, and ensures continuity of services during emergencies	Using the World Health Organization health system building blocks through survey of healthcare professionals to determine the performance of public healthcare facilities
Service delivery	Proportion of women 15–49 years and not pregnant using any modern family planning method at the time of the survey	6.2. Access and Availability	6.2.1. Health Benefit Package	6.2.1.2. All elements or components of the health benefit package are being executed or operationalized within a health system.	Measuring health system resilience in a highly fragile nation during protracted conflict: South Sudan 2011-15
Service delivery	Proportion of mothers of children 0–11 months who had at least four ANC visit during their last pregnancy	6.2. Access and Availability	6.2.1. Health Benefit Package	6.2.1.2. All elements or components of the health benefit package are being executed or operationalized within a health system.	Measuring health system resilience in a highly fragile nation during protracted conflict: South Sudan 2011-15
Service delivery	Proportion of mothers of children 0–11 months who received two or more doses of tetanus toxoid during their last pregnancy or who had life-time immunity	6.2. Access and Availability	6.2.1. Health Benefit Package	6.2.1.2. All elements or components of the health benefit package are being executed or operationalized within a health system.	Measuring health system resilience in a highly fragile nation during protracted conflict: South Sudan 2011-15
Service delivery	Proportion of mothers of children 0–11 months who received two or more doses of SP Fansidar/Intermittent Prevention therapy (IPT) for malaria during their last pregnancy	6.2. Access and Availability	6.2.1. Health Benefit Package	6.2.1.2. All elements or components of the health benefit package are being executed or operationalized within a health system.	Measuring health system resilience in a highly fragile nation during protracted conflict: South Sudan 2011-15
Service delivery	Proportion of mothers of children 0–11 months who delivered in the presence of skilled health personnel during their last pregnancy	6.2. Access and Availability	6.2.1. Health Benefit Package	6.2.1.2. All elements or components of the health benefit package are being executed or operationalized within a health system.	Measuring health system resilience in a highly fragile nation during protracted conflict: South Sudan 2011-15
Service delivery	Proportion of mothers of children 0–1 months who had at least one postnatal care visit within 6 weeks of delivery with a skilled health professional	6.2. Access and Availability	6.2.1. Health Benefit Package	6.2.1.2. All elements or components of the health benefit package are being executed or operationalized within a health system.	Measuring health system resilience in a highly fragile nation during protracted conflict: South Sudan 2011-15
Service delivery	Proportion of mothers of children 0–59 months who slept under an LLIN/ITN the night preceding the survey	6.2. Access and Availability	6.2.1. Health Benefit Package	6.2.1.2. All elements or components of the health benefit package are being executed or operationalized within a health system.	Measuring health system resilience in a highly fragile nation during protracted conflict: South Sudan 2011-15
Service delivery	Proportion of children 6–59 months who received Vitamin A supplement in the last 6 months	6.2. Access and Availability	6.2.1. Health Benefit Package	6.2.1.2. All elements or components of the health benefit package are being executed or operationalized within a health system.	Measuring health system resilience in a highly fragile nation during protracted conflict: South Sudan 2011-15
Service delivery	Proportion of children 12–23 months who received DPT3 vaccine before first birthday(card and recall)	6.2. Access and Availability	6.2.1. Health Benefit Package	6.2.1.2. All elements or components of the health benefit package are being executed or operationalized within a health system.	Measuring health system resilience in a highly fragile nation during protracted conflict: South Sudan 2011-15
Service delivery	Proportion of children 12–23 months who are fully vaccinated (BCG, DPT3, OPV3 and measles) before their first birthday (card and recall)	6.2. Access and Availability	6.2.1. Health Benefit Package	6.2.1.2. All elements or components of the health benefit package are being executed or operationalized within a health system.	Measuring health system resilience in a highly fragile nation during protracted conflict: South Sudan 2011-15
Service delivery	Total Fertility Rate (TFR) children per woman	6.2. Access and Availability	6.2.1. Health Benefit Package	6.2.1.2. All elements or components of the health benefit package are being executed or operationalized within a health system.	Liberia health system’s journey to long-term recovery and resilience post-Ebola: a case study of an exemplary multi-year collaboration
Service delivery	Proportion of children 0–59 months who slept under an LLIN/ ITN the night preceding the survey	6.2. Access and Availability	6.2.1. Health Benefit Package	6.2.1.2. All elements or components of the health benefit package are being executed or operationalized within a health system.	Measuring health system resilience in a highly fragile nation during protracted conflict: South Sudan 2011-15
Service delivery	Proportion of children 0–59 months with diarrhea in the 2 weeks before the survey	6.2. Access and Availability	6.2.1. Health Benefit Package	6.2.1.2. All elements or components of the health benefit package are being executed or operationalized within a health system.	Measuring health system resilience in a highly fragile nation during protracted conflict: South Sudan 2011-15
Service delivery	Physical, financial and/or social barriers hindering access to available essential services are known and minimized (diversity)	6.2. Access and Availability	6.2.1. Health Benefit Package	6.2.1.2. All elements or components of the health benefit package are being executed or operationalized within a health system.	On the resilience of health systems: A methodological exploration across countries in the WHO African Region
Service delivery	Health facilities have basic capacities needed for provision of a broad range of essential services: basic amenities: reliable power, water, sanitation, basic equipment, standard precautions for infection prevention, diagnostic capacity, essential medicines (diversity)	6.2. Access and Availability	6.2.1. Health Benefit Package	6.2.1.2. All elements or components of the health benefit package are being executed or operationalized within a health system.	On the resilience of health systems: A methodological exploration across countries in the WHO African Region
Service delivery	Case management procedures are implemented for IHR relevant hazards (IHR)	6.1. Governance and Management	6.1.2. Management of operations	6.1.2.3. Systems in place to ensure quality of service at facilities level	On the resilience of health systems: A methodological exploration across countries in the WHO African Region
Service delivery	Coordinating mechanism for laboratory services is established (IHR)	6.1. Governance and Management	6.1.2. Management of operations	6.1.2.3. Systems in place to ensure quality of service at facilities level	On the resilience of health systems: A methodological exploration across countries in the WHO African Region
Service delivery	Laboratory services are available to test for priority health threats (IHR)	6.1. Governance and Management	6.1.1. Service delivery planning employs balanced service delivery	6.1.1.1. Service delivery planning is data-informed, employs balanced service delivery, and ensures continuity of services during emergencies	On the resilience of health systems: A methodological exploration across countries in the WHO African Region
Service delivery	System for collection, packaging and transport of clinical specimens is established (IHR)	6.2. Access and Availability	6.2.1. Health Benefit Package	6.2.1.2. All elements or components of the health benefit package are being executed or operationalized within a health system.	On the resilience of health systems: A methodological exploration across countries in the WHO African Region
Service delivery	Laboratory biosafety and laboratory biosecurity (Biorisk management1) practices are in place (IHR)	6.1. Governance and Management	6.1.1. Service delivery planning employs balanced service delivery	6.1.1.1. Service delivery planning is data-informed, employs balanced service delivery, and ensures continuity of services during emergencies	On the resilience of health systems: A methodological exploration across countries in the WHO African Region
Service delivery	Laboratory data management and reporting is established (IHR)	6.1. Governance and Management	6.1.2. Management of operations	6.1.2.2. Data informs decision-making, performance monitoring, and strategic planning at all levels.	On the resilience of health systems: A methodological exploration across countries in the WHO African Region
Service delivery	Percent of the volume of outpatient services utilized between March 2020 and December 2021 compared to the expected volume (based on pre-pandemic seasonality and trends between January 2018 and February 2020	6.1. Governance and Management	6.1.2. Management of operations	6.1.2.5. Equitable distribution of health facilities to support Universal Health Coverage (UHC) by enhancing access to essential services and reducing disparities in access, regardless of location.	Resilience of front-line facilities during COVID-19: evidence from cross-sectional rapid surveys in eight low- and middle-income countries
Service delivery	Percent of facilities that increased the frequency of any outreach activities (e.g. immunization, malaria prevention, NTDs, NCDs, community clinics or home visits) or made adaptations to expand access to services (e.g. providing care in a single visit for multiple morbidities, providing home-based care, shifting clinical encounters to digital platforms and using novel dispensing approaches for me…	6.1. Governance and Management	6.1.2. Management of operations	6.1.2.5. Equitable distribution of health facilities to support Universal Health Coverage (UHC) by enhancing access to essential services and reducing disparities in access, regardless of location.	Resilience of front-line facilities during COVID-19: evidence from cross-sectional rapid surveys in eight low- and middle-income countries
Service delivery	Primary care facilities are providing at least 80% of the range of essential services they are expected to provide (diversity)	6.1. Governance and Management	6.1.2. Management of operations	6.1.2.5. Equitable distribution of health facilities to support Universal Health Coverage (UHC) by enhancing access to essential services and reducing disparities in access, regardless of location.	On the resilience of health systems: A methodological exploration across countries in the WHO African Region
Service delivery	Stunting in under-five children	6.2. Access and Availability	6.2.1. Health Benefit Package	6.2.1.2. All elements or components of the health benefit package are being executed or operationalized within a health system.	Liberia health system’s journey to long-term recovery and resilience post-Ebola: a case study of an exemplary multi-year collaboration
Service delivery	Wasting in under-five children	6.2. Access and Availability	6.2.1. Health Benefit Package	6.2.1.2. All elements or components of the health benefit package are being executed or operationalized within a health system.	Liberia health system’s journey to long-term recovery and resilience post-Ebola: a case study of an exemplary multi-year collaboration
Service delivery	Simulation exercise conducted in the last 12 months that includes testing operational capacity at the county level for EPR	6.1. Governance and Management	6.1.2. Management of operations	6.1.2.5. Equitable distribution of health facilities to support Universal Health Coverage (UHC) by enhancing access to essential services and reducing disparities in access, regardless of location.	Liberia health system’s journey to long-term recovery and resilience post-Ebola: a case study of an exemplary multi-year collaboration
Service delivery	Availability of clinical protocols for priority public health emergency case management	6.2. Access and Availability	6.2.1. Health Benefit Package	6.2.1.2. All elements or components of the health benefit package are being executed or operationalized within a health system.	Liberia health system’s journey to long-term recovery and resilience post-Ebola: a case study of an exemplary multi-year collaboration
Service delivery	Child mortality (per 1000 births)	6.2. Access and Availability	6.2.1. Health Benefit Package	6.2.1.2. All elements or components of the health benefit package are being executed or operationalized within a health system.	Liberia health system’s journey to long-term recovery and resilience post-Ebola: a case study of an exemplary multi-year collaboration
Service delivery	Delivery in a health facility (percentage)	6.2. Access and Availability	6.2.2. Service availability and readiness	6.2.2.2. Proportion of people in the most vulnerable areas provided with essential health services	Health system functionality in a low-income country in the midst of conflict: the case of Yemen
Health system financing	This facility currently has sufficient financing available to maintain routine operations during an emergency	5.3. Capacity of Public Institutions	5.3.1. Public Financial Management (PFM) System	5.3.1.1. Health budget formulation enables flexible spending that aligns with sector priorities, and ensures that public funds are directed toward priority populations, essential interventions, and providers payments are structured to reward outputs and performance	A checklist to improve health system resilience to infectious disease outbreaks and natural hazards
Service delivery	Family planning (modern method)	6.2. Access and Availability	6.2.1. Health Benefit Package	6.2.1.2. All elements or components of the health benefit package are being executed or operationalized within a health system.	Health system functionality in a low-income country in the midst of conflict: the case of Yemen
Health system financing	This facility has a financing department that has accounting capacities (i.e., they are able to track finances)	5.3. Capacity of Public Institutions	5.3.1. Public Financial Management (PFM) System	5.3.1.1. Health budget formulation enables flexible spending that aligns with sector priorities, and ensures that public funds are directed toward priority populations, essential interventions, and providers payments are structured to reward outputs and performance	A checklist to improve health system resilience to infectious disease outbreaks and natural hazards
Service delivery	distance to facilities	6.2. Access and Availability	6.2.1. Health Benefit Package	6.2.1.2. All elements or components of the health benefit package are being executed or operationalized within a health system.	Health system functionality in a low-income country in the midst of conflict: the case of Yemen
Health information systems	This facility currently has plans on how to coordinate with other facilities in the event that it needs to share supplies during an emergency.	3.2. Data Driven Decision Making	3.2.1 Data-Driven Decision Making	3.2.1.1.Data informs allocation of financial resources , multi-year planning and forecasting at the national and subnational levels	A checklist to improve health system resilience to infectious disease outbreaks and natural hazards
Service delivery	Access to essential medicines, equipment and basic utilities in the facilities	6.2. Access and Availability	6.2.1. Health Benefit Package	6.2.1.2. All elements or components of the health benefit package are being executed or operationalized within a health system.	Health system functionality in a low-income country in the midst of conflict: the case of Yemen
Service delivery	Patient perceptions of care (quality of care)	6.1. Governance and Management	6.1.1. Service delivery planning employs balanced service delivery	6.1.1.1. Service delivery planning is data-informed, employs balanced service delivery, and ensures continuity of services during emergencies	Health system functionality in a low-income country in the midst of conflict: the case of Yemen
Service delivery	Facilities density per 100 000 population	6.1. Governance and Management	6.1.2. Management of operations	6.1.2.5. Equitable distribution of health facilities to support Universal Health Coverage (UHC) by enhancing access to essential services and reducing disparities in access, regardless of location.	Health system functionality in a low-income country in the midst of conflict: the case of Yemen
Service delivery	Use of modern family planning method by married women (15–49 years)	6.2. Access and Availability	6.2.1. Health Benefit Package	6.2.1.2. All elements or components of the health benefit package are being executed or operationalized within a health system.	Liberia health system’s journey to long-term recovery and resilience post-Ebola: a case study of an exemplary multi-year collaboration
Service delivery	Antenatal care provided by skilled health workers	6.2. Access and Availability	6.2.1. Health Benefit Package	6.2.1.2. All elements or components of the health benefit package are being executed or operationalized within a health system.	Liberia health system’s journey to long-term recovery and resilience post-Ebola: a case study of an exemplary multi-year collaboration
Service delivery	Skilled assistance during delivery	6.2. Access and Availability	6.2.1. Health Benefit Package	6.2.1.2. All elements or components of the health benefit package are being executed or operationalized within a health system.	Liberia health system’s journey to long-term recovery and resilience post-Ebola: a case study of an exemplary multi-year collaboration
Service delivery	Comprehensive knowledge of HIV/AIDS (male)	6.2. Access and Availability	6.2.1. Health Benefit Package	6.2.1.2. All elements or components of the health benefit package are being executed or operationalized within a health system.	Liberia health system’s journey to long-term recovery and resilience post-Ebola: a case study of an exemplary multi-year collaboration
Health system financing	Access barriers due to treatment costs	5.2. Purcahsing access and Financial Protection	5.2.2.Financial Protection	5.2.2.2. Out-of-pocket health expenditures are minimized, effective fee exemptions are in place, and informal fees are eliminated to promote equitable access to healthcare	Better Measurement for Performance Improvement in Low- and Middle-Income Countries: The Primary Health Care Performance Initiative (PHCPI) Experience of Conceptual Framework Development and Indicator Selection
Service delivery	Comprehensive knowledge of HIV/AIDS (female)	6.2. Access and Availability	6.2.1. Health Benefit Package	6.2.1.2. All elements or components of the health benefit package are being executed or operationalized within a health system.	Liberia health system’s journey to long-term recovery and resilience post-Ebola: a case study of an exemplary multi-year collaboration
Service delivery	Percent of facilities that had masks (N95 or surgical masks) and gloves available and handwashing stations available during the first survey round	6.2. Access and Availability	6.2.1. Health Benefit Package	6.2.1.2. All elements or components of the health benefit package are being executed or operationalized within a health system.	Resilience of front-line facilities during COVID-19: evidence from cross-sectional rapid surveys in eight low- and middle-income countries
Health system financing	General government health expenditure as a percent of total health expenditure	5.1. Governance Revenue raising and Pooling	5.1.1. Health financing policy and decision making	5.1.1.1. Health financing policies are guided by UHC goals and high-quality health financing data are systematically used to inform decision making	Better Measurement for Performance Improvement in Low- and Middle-Income Countries: The Primary Health Care Performance Initiative (PHCPI) Experience of Conceptual Framework Development and Indicator Selection
Service delivery	Pregnant women receiving intermittent preventive therapy (IPT)	6.2. Access and Availability	6.2.1. Health Benefit Package	6.2.1.2. All elements or components of the health benefit package are being executed or operationalized within a health system.	Liberia health system’s journey to long-term recovery and resilience post-Ebola: a case study of an exemplary multi-year collaboration
Service delivery	Insecticide-treated Net use (pregnant women 15–49 years)	6.2. Access and Availability	6.2.1. Health Benefit Package	6.2.1.2. All elements or components of the health benefit package are being executed or operationalized within a health system.	Liberia health system’s journey to long-term recovery and resilience post-Ebola: a case study of an exemplary multi-year collaboration
Service delivery	Insecticide-treated nets ownership (household)	6.2. Access and Availability	6.2.1. Health Benefit Package	6.2.1.2. All elements or components of the health benefit package are being executed or operationalized within a health system.	Liberia health system’s journey to long-term recovery and resilience post-Ebola: a case study of an exemplary multi-year collaboration
Service delivery	Children 12–23 months with full immunization coverage	6.2. Access and Availability	6.2.1. Health Benefit Package	6.2.1.2. All elements or components of the health benefit package are being executed or operationalized within a health system.	Liberia health system’s journey to long-term recovery and resilience post-Ebola: a case study of an exemplary multi-year collaboration
Health workforce	Provider burnout	2.3. Heath workforce management	2.3.1. Heath sector wages and benefits compared to other government sectors	2.3.1.1. The PayScale and non-wage benefits is competitive and attract and retain qualified health workers	Better Measurement for Performance Improvement in Low- and Middle-Income Countries: The Primary Health Care Performance Initiative (PHCPI) Experience of Conceptual Framework Development and Indicator Selection
Service delivery	Institutional deliveries	6.2. Access and Availability	6.2.1. Health Benefit Package	6.2.1.2. All elements or components of the health benefit package are being executed or operationalized within a health system.	Liberia health system’s journey to long-term recovery and resilience post-Ebola: a case study of an exemplary multi-year collaboration
Service delivery	Insecticide-treated Net use (children under five)	6.2. Access and Availability	6.2.1. Health Benefit Package	6.2.1.2. All elements or components of the health benefit package are being executed or operationalized within a health system.	Liberia health system’s journey to long-term recovery and resilience post-Ebola: a case study of an exemplary multi-year collaboration
Service delivery	This facility currently has plans on how to coordinate with other facilities in the event that it needs to transfer patients during an emergency	6.1. Governance and Management	6.1.2. Management of operations	6.1.2.3. Systems in place to ensure quality of service at facilities level	A checklist to improve health system resilience to infectious disease outbreaks and natural hazards
Service delivery	This facility currently has the means for communication with other facilities during emergencies.	6.1. Governance and Management	6.1.2. Management of operations	6.1.2.3. Systems in place to ensure quality of service at facilities level	A checklist to improve health system resilience to infectious disease outbreaks and natural hazards
Service delivery	This facility collaborates with emergency medical providers and has established standard operating procedures and a minimal degree of wireless communication	6.1. Governance and Management	6.1.2. Management of operations	6.1.2.3. Systems in place to ensure quality of service at facilities level	A checklist to improve health system resilience to infectious disease outbreaks and natural hazards
Service delivery	This facility currently has plans for continued access to essential medicines during an emergency.	6.1. Governance and Management	6.1.2. Management of operations	6.1.2.3. Systems in place to ensure quality of service at facilities level	A checklist to improve health system resilience to infectious disease outbreaks and natural hazards
Service delivery	This facility conducts routine community outreach and engagement to build public trust and credibility of healthcare system in advance of an emergency	6.1. Governance and Management	6.1.2. Management of operations	6.1.2.3. Systems in place to ensure quality of service at facilities level	A checklist to improve health system resilience to infectious disease outbreaks and natural hazards
Service delivery	Access barriers due to distance	6.2. Access and Availability	6.2.2. Service availability and readiness	6.2.2.2. Proportion of people in the most vulnerable areas provided with essential health services	Better Measurement for Performance Improvement in Low- and Middle-Income Countries: The Primary Health Care Performance Initiative (PHCPI) Experience of Conceptual Framework Development and Indicator Selection
Service delivery	Timeliness (3 indicators) When the facility is open and you get sick, would someone see you the same day? Is it very or somewhat difficult to get medical care in the evening, weekend, or on a holiday without going to the emergency room? Waiting time for being seen in emergency care need was 2 hours or more	6.2. Access and Availability	6.2.2. Service availability and readiness	6.2.2.2. Proportion of people in the most vulnerable areas provided with essential health services	Better Measurement for Performance Improvement in Low- and Middle-Income Countries: The Primary Health Care Performance Initiative (PHCPI) Experience of Conceptual Framework Development and Indicator Selection
Service delivery	First-contact access (4 indicators): Is it difficult for you to get medical care at the primary health care facility when you think you need it? is it easy to get an appointment for a routine concern? When the primary health care facility is closed, is there a phone number you can call when you get sick? When you have a new health problem, do you go to your regular primary health care facility be…	6.2. Access and Availability	6.2.2. Service availability and readiness	6.2.2.2. Proportion of people in the most vulnerable areas provided with essential health services	Better Measurement for Performance Improvement in Low- and Middle-Income Countries: The Primary Health Care Performance Initiative (PHCPI) Experience of Conceptual Framework Development and Indicator Selection
Service delivery	Tobacco use among adults	6.2. Access and Availability	6.2.1. Health Benefit Package	6.2.1.2. All elements or components of the health benefit package are being executed or operationalized within a health system.	Better Measurement for Performance Improvement in Low- and Middle-Income Countries: The Primary Health Care Performance Initiative (PHCPI) Experience of Conceptual Framework Development and Indicator Selection
Service delivery	Differential rate ratio of Q1-Q5 maternal mortality ratio	6.2. Access and Availability	6.2.1. Health Benefit Package	6.2.1.2. All elements or components of the health benefit package are being executed or operationalized within a health system.	Better Measurement for Performance Improvement in Low- and Middle-Income Countries: The Primary Health Care Performance Initiative (PHCPI) Experience of Conceptual Framework Development and Indicator Selection
Health information systems	Learns quickly about population health threats (aware)	3.2. Data Driven Decision Making	3.2.1 Data-Driven Decision Making	3.2.1.1.Data informs allocation of financial resources , multi-year planning and forecasting at the national and subnational levels	Beyond the crisis: did the Ebola epidemic improve resilience of Liberia’s health system?
Leadership and governance	Understand strength and weakness in health system (aware)	1.1. Vision and strategic direction	1.1.1. Explicit Vision	1.1.1.1. National strategy is based on a sound situation analysis of the context with clear and explicit goals and funding priorities	Health system resilience indicators: an integrated package for measuring and monitoring health system resilience in countries
Health information systems	Knows current status of supplies equipment and staff in country (aware)	3.2. Data Driven Decision Making	3.2.1 Data-Driven Decision Making	3.2.1.1.Data informs allocation of financial resources , multi-year planning and forecasting at the national and subnational levels	Beyond the crisis: did the Ebola epidemic improve resilience of Liberia’s health system?
Service delivery	Formal system for referring patients and/or accepting patients	6.2. Access and Availability	6.2.2. Service availability and readiness	6.2.2.2. Proportion of people in the most vulnerable areas provided with essential health services	Better Measurement for Performance Improvement in Low- and Middle-Income Countries: The Primary Health Care Performance Initiative (PHCPI) Experience of Conceptual Framework Development and Indicator Selection
Service delivery	Health Facility Density	6.1. Governance and Management	6.1.2. Management of operations	6.1.2.5. Equitable distribution of health facilities to support Universal Health Coverage (UHC) by enhancing access to essential services and reducing disparities in access, regardless of location.	Towards universal health coverage in the WHO African Region: assessing health system functionality, incorporating lessons from COVID-19
Service delivery	Relational continuity (2 indicators) : When you go to your primary health care facility, do you see the same health care provider each time? How confident are you that your health care provider at the primary health care facility will look after you, no matter what happens in the future to your health?	6.2. Access and Availability	6.2.2. Service availability and readiness	6.2.2.2. Proportion of people in the most vulnerable areas provided with essential health services	Better Measurement for Performance Improvement in Low- and Middle-Income Countries: The Primary Health Care Performance Initiative (PHCPI) Experience of Conceptual Framework Development and Indicator Selection
Leadership and governance	There are functional mechanisms for communication and engagement with other health related sectors in the area of responsibility of public facilities – such as agriculture, water, security	1.2. Implementation and Management	1.2.3. Intersectoral Collaboration for Health	1.2.3.1 Relevant multisectoral policies and legislation are fully implemented at both national and subnational levels and funding from other sectors is allocated to health	Towards universal health coverage in the WHO African Region: assessing health system functionality, incorporating lessons from COVID-19
Service delivery	Number and distribution of health facilities per 10 000 population	6.1. Governance and Management	6.1.2. Management of operations	6.1.2.5. Equitable distribution of health facilities to support Universal Health Coverage (UHC) by enhancing access to essential services and reducing disparities in access, regardless of location.	World Health Organization. Monitoring the Building Blocks of Health Systems: A Handbook of Indicators and Their Measurement Strategies. Geneva: World Health Organization, 2010.
Service delivery	Number of outpatient department visits per 10 000 population per year	6.2. Access and Availability	6.2.2. Service availability and readiness	6.2.2.2. Proportion of people in the most vulnerable areas provided with essential health services	World Health Organization. Monitoring the Building Blocks of Health Systems: A Handbook of Indicators and Their Measurement Strategies. Geneva: World Health Organization, 2010.
Service delivery	Proportion of health facilities offering specific services	6.2. Access and Availability	6.2.1. Health Benefit Package	6.2.1.2. All elements or components of the health benefit package are being executed or operationalized within a health system.	World Health Organization. Monitoring the Building Blocks of Health Systems: A Handbook of Indicators and Their Measurement Strategies. Geneva: World Health Organization, 2010.
Service delivery	Number and distribution of health facilities offering specific services per 10 000 population	6.2. Access and Availability	6.2.2. Service availability and readiness	6.2.2.2. Proportion of people in the most vulnerable areas provided with essential health services	World Health Organization. Monitoring the Building Blocks of Health Systems: A Handbook of Indicators and Their Measurement Strategies. Geneva: World Health Organization, 2010.
Service delivery	Number and distribution of inpatient beds per 10 000 population (ref_1b)	6.2. Access and Availability	6.2.2. Service availability and readiness	6.2.2.2. Proportion of people in the most vulnerable areas provided with essential health services	World Health Organization. Monitoring the Building Blocks of Health Systems: A Handbook of Indicators and Their Measurement Strategies. Geneva: World Health Organization, 2010.
Service delivery	General service readiness score for health facilities. (ref_2a)	6.2. Access and Availability	6.2.1. Health Benefit Package	6.2.1.2. All elements or components of the health benefit package are being executed or operationalized within a health system.	World Health Organization. Monitoring the Building Blocks of Health Systems: A Handbook of Indicators and Their Measurement Strategies. Geneva: World Health Organization, 2010.
Service delivery	Specific-services readiness score for health facilities (ref_4a)	6.2. Access and Availability	6.2.1. Health Benefit Package	6.2.1.2. All elements or components of the health benefit package are being executed or operationalized within a health system.	World Health Organization. Monitoring the Building Blocks of Health Systems: A Handbook of Indicators and Their Measurement Strategies. Geneva: World Health Organization, 2010.
Service delivery	Number of primary care or outpatient department visits per person per year (ref_12)	6.2. Access and Availability	6.2.2. Service availability and readiness	6.2.2.2. Proportion of people in the most vulnerable areas provided with essential health services	United States Agency for International Development (USAID). (2017). The Health Systems Assessment Approach: A how-to manual. Version 3.0.
Service delivery	Demand for family planning satisfied with modern methods (ref_13)	6.2. Access and Availability	6.2.1. Health Benefit Package	6.2.1.2. All elements or components of the health benefit package are being executed or operationalized within a health system.	United States Agency for International Development (USAID). (2017). The Health Systems Assessment Approach: A how-to manual. Version 3.0.
Service delivery	Antenatal care coverage—at least four visits (percentage) (ref_14)	6.2. Access and Availability	6.2.1. Health Benefit Package	6.2.1.2. All elements or components of the health benefit package are being executed or operationalized within a health system.	United States Agency for International Development (USAID). (2017). The Health Systems Assessment Approach: A how-to manual. Version 3.0.
Service delivery	Births attended by skilled health personnel (ref_15)	6.2. Access and Availability	6.2.1. Health Benefit Package	6.2.1.2. All elements or components of the health benefit package are being executed or operationalized within a health system.	United States Agency for International Development (USAID). (2017). The Health Systems Assessment Approach: A how-to manual. Version 3.0.
Service delivery	Contraceptive prevalence rate (ref_29)	6.2. Access and Availability	6.2.1. Health Benefit Package	6.2.1.2. All elements or components of the health benefit package are being executed or operationalized within a health system.	United States Agency for International Development (USAID). (2017). The Health Systems Assessment Approach: A how-to manual. Version 3.0.
Service delivery	Unmet need for family planning (percentage) (ref_30)	6.2. Access and Availability	6.2.1. Health Benefit Package	6.2.1.2. All elements or components of the health benefit package are being executed or operationalized within a health system.	United States Agency for International Development (USAID). (2017). The Health Systems Assessment Approach: A how-to manual. Version 3.0.
Service delivery	Percentage of women who had blood pressure measured at the last antenatal care visit (ref_36)	6.2. Access and Availability	6.2.2. Service availability and readiness	6.2.2.2. Proportion of people in the most vulnerable areas provided with essential health services	United States Agency for International Development (USAID). (2017). The Health Systems Assessment Approach: A how-to manual. Version 3.0.
Service delivery	Antenatal corticosteroid use (ref_37)	6.2. Access and Availability	6.2.2. Service availability and readiness	6.2.2.2. Proportion of people in the most vulnerable areas provided with essential health services	United States Agency for International Development (USAID). (2017). The Health Systems Assessment Approach: A how-to manual. Version 3.0.
Service delivery	Prevention of postpartum hemorrhage in health facilities (ref_38)	6.1. Governance and Management	6.1.2. Management of operations	6.1.2.3. Systems in place to ensure quality of service at facilities level	United States Agency for International Development (USAID). (2017). The Health Systems Assessment Approach: A how-to manual. Version 3.0.
Service delivery	Severe systemic infection/sepsis in the postnatal period (ref_39)	6.1. Governance and Management	6.1.2. Management of operations	6.1.2.3. Systems in place to ensure quality of service at facilities level	United States Agency for International Development (USAID). (2017). The Health Systems Assessment Approach: A how-to manual. Version 3.0.
Service delivery	Evidence-based treatment of preeclampsia/eclampsia (percentage) (ref_40)	6.1. Governance and Management	6.1.2. Management of operations	6.1.2.3. Systems in place to ensure quality of service at facilities level	United States Agency for International Development (USAID). (2017). The Health Systems Assessment Approach: A how-to manual. Version 3.0.
Service delivery	Maternal death occurring in the facility that were audited (percentage)(Also neonatal and perinatal death reviews)(ref_41)	6.1. Governance and Management	6.1.2. Management of operations	6.1.2.3. Systems in place to ensure quality of service at facilities level	United States Agency for International Development (USAID). (2017). The Health Systems Assessment Approach: A how-to manual. Version 3.0.
Service delivery	Successful newborn resuscitation (percentage) (ref_42)	6.1. Governance and Management	6.1.2. Management of operations	6.1.2.3. Systems in place to ensure quality of service at facilities level	United States Agency for International Development (USAID). (2017). The Health Systems Assessment Approach: A how-to manual. Version 3.0.
Service delivery	Young infants who received appropriate antibiotic therapy for possible serious bacterial infection (percentage) (ref_43)	6.1. Governance and Management	6.1.2. Management of operations	6.1.2.3. Systems in place to ensure quality of service at facilities level	United States Agency for International Development (USAID). (2017). The Health Systems Assessment Approach: A how-to manual. Version 3.0.
Service delivery	Geographic access to health services: Percentage of population living within 5 kilometers of a health facility (total number of health facilities per 10,000 population). (ref_7)	6.2. Access and Availability	6.2.2. Service availability and readiness	6.2.2.2. Proportion of people in the most vulnerable areas provided with essential health services	United States Agency for International Development (USAID). (2017). The Health Systems Assessment Approach: A how-to manual. Version 3.0.
Service delivery	Health worker density and distribution (per 1000 population) and disaggregation by cadre, urban/rural, PHC/hospital in health workforce (ref_1)	6.1. Governance and Management	6.1.2. Management of operations	6.1.2.5. Equitable distribution of health facilities to support Universal Health Coverage (UHC) by enhancing access to essential services and reducing disparities in access, regardless of location.	United States Agency for International Development (USAID). (2017). The Health Systems Assessment Approach: A how-to manual. Version 3.0.
Service delivery	Financial access to health services,Percentage of households (respondents) not seeking health care services when needed because household cannot afford it. Financial protection health finance (ref_8)	6.2. Access and Availability	6.2.2. Service availability and readiness	6.2.2.2. Proportion of people in the most vulnerable areas provided with essential health services	United States Agency for International Development (USAID). (2017). The Health Systems Assessment Approach: A how-to manual. Version 3.0.
Service delivery	Availability of essential medicines and Commodities (physical availability) under medical products (ref_9)	6.2. Access and Availability	6.2.1. Health Benefit Package	6.2.1.2. All elements or components of the health benefit package are being executed or operationalized within a health system.	United States Agency for International Development (USAID). (2017). The Health Systems Assessment Approach: A how-to manual. Version 3.0.
Service delivery	Financial access to medicines (ref_10)	6.2. Access and Availability	6.2.2. Service availability and readiness	6.2.2.2. Proportion of people in the most vulnerable areas provided with essential health services	United States Agency for International Development (USAID). (2017). The Health Systems Assessment Approach: A how-to manual. Version 3.0.
Service delivery	Financial access to medicines (alternative): Households whose monthly medicine expenditures represent at least 20 percent of total Expenditures.Financial protection health finance (ref_11)	6.2. Access and Availability	6.2.2. Service availability and readiness	6.2.2.2. Proportion of people in the most vulnerable areas provided with essential health services	United States Agency for International Development (USAID). (2017). The Health Systems Assessment Approach: A how-to manual. Version 3.0.
Service delivery	Children with diarrhea receiving oral rehydration solution (ORS) (and Zinc, if data available) (ref_16)	6.2. Access and Availability	6.2.1. Health Benefit Package	6.2.1.2. All elements or components of the health benefit package are being executed or operationalized within a health system.	United States Agency for International Development (USAID). (2017). The Health Systems Assessment Approach: A how-to manual. Version 3.0.
Service delivery	Percentage of children under age 5 with suspected pneumonia/acute respiratory infection taken/referred to facility (ref_17)	6.1. Governance and Management	6.1.1. Service delivery planning employs balanced service delivery	6.1.1.1. Service delivery planning is data-informed, employs balanced service delivery, and ensures continuity of services during emergencies	United States Agency for International Development (USAID). (2017). The Health Systems Assessment Approach: A how-to manual. Version 3.0.
Service delivery	Immunization coverage rate by vaccine for each vaccine in the national schedule (ref_18)	6.2. Access and Availability	6.2.1. Health Benefit Package	6.2.1.2. All elements or components of the health benefit package are being executed or operationalized within a health system.	United States Agency for International Development (USAID). (2017). The Health Systems Assessment Approach: A how-to manual. Version 3.0.
Service delivery	Coverage of first preventive infant visit (ref_31)	6.2. Access and Availability	6.2.1. Health Benefit Package	6.2.1.2. All elements or components of the health benefit package are being executed or operationalized within a health system.	United States Agency for International Development (USAID). (2017). The Health Systems Assessment Approach: A how-to manual. Version 3.0.
Service delivery	People living with HIV who have been diagnosed (percentage) (ref_19)	6.2. Access and Availability	6.2.1. Health Benefit Package	6.2.1.2. All elements or components of the health benefit package are being executed or operationalized within a health system.	United States Agency for International Development (USAID). (2017). The Health Systems Assessment Approach: A how-to manual. Version 3.0.
Service delivery	Prevention of mother-to-child transmission (ref_20)	6.2. Access and Availability	6.2.1. Health Benefit Package	6.2.1.2. All elements or components of the health benefit package are being executed or operationalized within a health system.	United States Agency for International Development (USAID). (2017). The Health Systems Assessment Approach: A how-to manual. Version 3.0.
Service delivery	Antiretroviral Therapy retention rate (ref_49)	6.2. Access and Availability	6.2.1. Health Benefit Package	6.2.1.2. All elements or components of the health benefit package are being executed or operationalized within a health system.	United States Agency for International Development (USAID). (2017). The Health Systems Assessment Approach: A how-to manual. Version 3.0.
Service delivery	HIV test results for registered new and relapsed TB patients (ref_22)	6.2. Access and Availability	6.2.2. Service availability and readiness	6.2.2.2. Proportion of people in the most vulnerable areas provided with essential health services	United States Agency for International Development (USAID). (2017). The Health Systems Assessment Approach: A how-to manual. Version 3.0.
Service delivery	TB patients with results for drug susceptibility testing (ref_23)	6.2. Access and Availability	6.2.2. Service availability and readiness	6.2.2.2. Proportion of people in the most vulnerable areas provided with essential health services	United States Agency for International Development (USAID). (2017). The Health Systems Assessment Approach: A how-to manual. Version 3.0.
Service delivery	TB case detection rate for all forms of tuberculosis (ref_24)	6.2. Access and Availability	6.2.1. Health Benefit Package	6.2.1.2. All elements or components of the health benefit package are being executed or operationalized within a health system.	United States Agency for International Development (USAID). (2017). The Health Systems Assessment Approach: A how-to manual. Version 3.0.
Service delivery	Tuberculosis treatment success rate (ref_50)	6.2. Access and Availability	6.2.1. Health Benefit Package	6.2.1.2. All elements or components of the health benefit package are being executed or operationalized within a health system.	United States Agency for International Development (USAID). (2017). The Health Systems Assessment Approach: A how-to manual. Version 3.0.
Service delivery	Second-line treatment coverage among multidrug- resistant tuberculosis (MDR- TB) cases (ref_25)	6.2. Access and Availability	6.2.1. Health Benefit Package	6.2.1.2. All elements or components of the health benefit package are being executed or operationalized within a health system.	United States Agency for International Development (USAID). (2017). The Health Systems Assessment Approach: A how-to manual. Version 3.0.
Service delivery	Intermittent preventive therapy for malaria during pregnancy (ref_26)	6.2. Access and Availability	6.2.1. Health Benefit Package	6.2.1.2. All elements or components of the health benefit package are being executed or operationalized within a health system.	United States Agency for International Development (USAID). (2017). The Health Systems Assessment Approach: A how-to manual. Version 3.0.
Service delivery	Cervical cancer screening (ref_27)	6.2. Access and Availability	6.2.1. Health Benefit Package	6.2.1.2. All elements or components of the health benefit package are being executed or operationalized within a health system.	United States Agency for International Development (USAID). (2017). The Health Systems Assessment Approach: A how-to manual. Version 3.0.
Service delivery	Drug therapy and counseling to prevent heart attacks and stroke (ref_28)	6.2. Access and Availability	6.2.1. Health Benefit Package	6.2.1.2. All elements or components of the health benefit package are being executed or operationalized within a health system.	United States Agency for International Development (USAID). (2017). The Health Systems Assessment Approach: A how-to manual. Version 3.0.
Service delivery	Condom use at last sex with high-risk partner (ref_32)	6.2. Access and Availability	6.2.1. Health Benefit Package	6.2.1.2. All elements or components of the health benefit package are being executed or operationalized within a health system.	United States Agency for International Development (USAID). (2017). The Health Systems Assessment Approach: A how-to manual. Version 3.0.
Service delivery	Knowledge, attitudes, and practices (KAP) regarding key health issues and services Quality (ref_33)	6.1. Governance and Management	6.1.2. Management of operations	6.1.2.3. Systems in place to ensure quality of service at facilities level	United States Agency for International Development (USAID). (2017). The Health Systems Assessment Approach: A how-to manual. Version 3.0.
Service delivery	Institutional maternal mortality ratio (per 100,000 deliveries) (ref_34)	6.1. Governance and Management	6.1.1. Service delivery planning employs balanced service delivery	6.1.1.1. Service delivery planning is data-informed, employs balanced service delivery, and ensures continuity of services during emergencies	United States Agency for International Development (USAID). (2017). The Health Systems Assessment Approach: A how-to manual. Version 3.0.
Service delivery	Cause-specific death per 1000 admissions for major causes of death (ref_35)	6.1. Governance and Management	6.1.2. Management of operations	6.1.2.3. Systems in place to ensure quality of service at facilities level	United States Agency for International Development (USAID). (2017). The Health Systems Assessment Approach: A how-to manual. Version 3.0.
Service delivery	Children who are correctly prescribed antibiotic for pneumonia (percentage) (ref_44)	6.1. Governance and Management	6.1.2. Management of operations	6.1.2.3. Systems in place to ensure quality of service at facilities level	United States Agency for International Development (USAID). (2017). The Health Systems Assessment Approach: A how-to manual. Version 3.0.
Service delivery	Percentage of patients with hypertension with established blood pressure control during the last visit (ref_45)	6.2. Access and Availability	6.2.1. Health Benefit Package	6.2.1.2. All elements or components of the health benefit package are being executed or operationalized within a health system.	United States Agency for International Development (USAID). (2017). The Health Systems Assessment Approach: A how-to manual. Version 3.0.
Service delivery	Assessment of 10-year CVD risk (percentage) among adult patients (ref_46)	6.2. Access and Availability	6.2.1. Health Benefit Package	6.2.1.2. All elements or components of the health benefit package are being executed or operationalized within a health system.	United States Agency for International Development (USAID). (2017). The Health Systems Assessment Approach: A how-to manual. Version 3.0.
Service delivery	Drug therapy and counseling to prevent heart attacks and stroke in high CVD risk individuals and people with diabetes and established CVD (percentage) (ref_47)	6.2. Access and Availability	6.2.1. Health Benefit Package	6.2.1.2. All elements or components of the health benefit package are being executed or operationalized within a health system.	United States Agency for International Development (USAID). (2017). The Health Systems Assessment Approach: A how-to manual. Version 3.0.
Service delivery	Hospital readmission rates (ref_48)	6.1. Governance and Management	6.1.2. Management of operations	6.1.2.3. Systems in place to ensure quality of service at facilities level	United States Agency for International Development (USAID). (2017). The Health Systems Assessment Approach: A how-to manual. Version 3.0.
Service delivery	Patient satisfaction (ref_51)	6.1. Governance and Management	6.1.1. Service delivery planning employs balanced service delivery	6.1.1.1. Service delivery planning is data-informed, employs balanced service delivery, and ensures continuity of services during emergencies	United States Agency for International Development (USAID). (2017). The Health Systems Assessment Approach: A how-to manual. Version 3.0.
Service delivery	Servicespecific availability per 10,000 population (ref_4) (ref_5)	6.2. Access and Availability	6.2.1. Health Benefit Package	6.2.1.2. All elements or components of the health benefit package are being executed or operationalized within a health system.	United States Agency for International Development (USAID). (2017). The Health Systems Assessment Approach: A how-to manual. Version 3.0.
Service delivery	Hospital bed density and distribution (per 10000 population)(ref_2)	6.1. Governance and Management	6.1.1. Service delivery planning employs balanced service delivery	6.1.1.1. Service delivery planning is data-informed, employs balanced service delivery, and ensures continuity of services during emergencies	United States Agency for International Development (USAID). (2017). The Health Systems Assessment Approach: A how-to manual. Version 3.0.
Service delivery	Number of primary care, facilities per 10,000 population (ref_3)	6.1. Governance and Management	6.1.1. Service delivery planning employs balanced service delivery	6.1.1.1. Service delivery planning is data-informed, employs balanced service delivery, and ensures continuity of services during emergencies	United States Agency for International Development (USAID). (2017). The Health Systems Assessment Approach: A how-to manual. Version 3.0.
Service delivery	Community Health worker (CHW)/Community Health Volunteer (CHV) density and distribution (ref_6)	6.1. Governance and Management	6.1.1. Service delivery planning employs balanced service delivery	6.1.1.1. Service delivery planning is data-informed, employs balanced service delivery, and ensures continuity of services during emergencies	United States Agency for International Development (USAID). (2017). The Health Systems Assessment Approach: A how-to manual. Version 3.0.
Service delivery	Antiretroviral therapy (ART) coverage (percentage) (ref_21)	6.2. Access and Availability	6.2.1. Health Benefit Package	6.2.1.2. All elements or components of the health benefit package are being executed or operationalized within a health system.	United States Agency for International Development (USAID). (2017). The Health Systems Assessment Approach: A how-to manual. Version 3.0.
Service delivery	Unnecessary or harmful practices during labor, childbirth, and the early postnatal period (ref_52)	6.1. Governance and Management	6.1.2. Management of operations	6.1.2.3. Systems in place to ensure quality of service at facilities level	United States Agency for International Development (USAID). (2017). The Health Systems Assessment Approach: A how-to manual. Version 3.0.
Service delivery	Percentage of health facilities that participated in a simulation exercise to test health system resilience within the last year (ref_2).	6.1. Governance and Management	6.1.2. Management of operations	6.1.2.2. Data informs decision-making, performance monitoring, and strategic planning at all levels.	Health system resilience indicators: an integrated package for measuring and monitoring health system resilience in countries
Service delivery	Percentage of health facilities that have conducted or participated in after-action reviews (AAR) and/or intra-action reviews (IAR) that evaluated health system performance including maintenance of essential health services in the last year (ref_3)	6.1. Governance and Management	6.1.2. Management of operations	6.1.2.2. Data informs decision-making, performance monitoring, and strategic planning at all levels.	Health system resilience indicators: an integrated package for measuring and monitoring health system resilience in countries
Service delivery	Percentage of health facilities that were closed or discontinued routine health services (completely or partially for one day or more) in the last year (ref_4)	6.2. Access and Availability	6.2.1. Health Benefit Package	6.2.1.2. All elements or components of the health benefit package are being executed or operationalized within a health system.	Health system resilience indicators: an integrated package for measuring and monitoring health system resilience in countries
Service delivery	Existence of formal linkages between facility-based and community-based service delivery (ref_6)	6.1. Governance and Management	6.1.2. Management of operations	6.1.2.5. Equitable distribution of health facilities to support Universal Health Coverage (UHC) by enhancing access to essential services and reducing disparities in access, regardless of location.	Health system resilience indicators: an integrated package for measuring and monitoring health system resilience in countries
Service delivery	Percentage of health facilities that participate in a platform to share good practices and lessons learned from public health challenges (including emergencies) (ref_7)	6.1. Governance and Management	6.1.2. Management of operations	6.1.2.2. Data informs decision-making, performance monitoring, and strategic planning at all levels.	Health system resilience indicators: an integrated package for measuring and monitoring health system resilience in countries
Service delivery	Percentage of facilities that use community health needs and priorities to inform service prioritization (ref_8)	6.1. Governance and Management	6.1.2. Management of operations	6.1.2.2. Data informs decision-making, performance monitoring, and strategic planning at all levels.	Health system resilience indicators: an integrated package for measuring and monitoring health system resilience in countries
Service delivery	Percentage of facilities offering services according to nationally defined essential health service package for their level of care (ref_1)	6.2. Access and Availability	6.2.1. Health Benefit Package	6.2.1.2. All elements or components of the health benefit package are being executed or operationalized within a health system.	Health system resilience indicators: an integrated package for measuring and monitoring health system resilience in countries
Service delivery	Percentage of facilities that meet specified Infection Prevention and Control Assessment Framework (IPCAF) level/score. (ref_5)	6.1. Governance and Management	6.1.2. Management of operations	6.1.2.3. Systems in place to ensure quality of service at facilities level	Health system resilience indicators: an integrated package for measuring and monitoring health system resilience in countries
Service delivery	National clinical case management guidelines for priority health events are implemented at all levels and are exercised (as applicable), reviewed, evaluated and updated on regular basis (ref_C8.1)	6.1. Governance and Management	6.1.2. Management of operations	6.1.2.3. Systems in place to ensure quality of service at facilities level	International Health Regulations (2005): States Parties Self-assessment annual reporting tool, second edition.
Service delivery	Continuity of essential health services: A package of EHS, plans/guidelines on continuity of EHS in emergencies, and mechanisms for monitoring service continuity based on existing guidelines are defined and functional at national, intermediate and local levels and exercised, reviewed, evaluated and updated, with improvements based on SimEx and lessons learned from real-world events, e.g., IARs or…	6.2. Access and Availability	6.2.1. Health Benefit Package	6.2.1.2. All elements or components of the health benefit package are being executed or operationalized within a health system.	International Health Regulations (2005): States Parties Self-assessment annual reporting tool, second edition.
Service delivery	IPC program: IPC programmes are in place and functioning at national and health facility levels according to the WHO IPC core components and their compliance and effectiveness are exercised (as applicable), reviewed, evaluated and published. Plans and guidance are regularly updated in response to monitoring and feedback.(ref_C.9.1)	6.1. Governance and Management	6.1.2. Management of operations	6.1.2.3. Systems in place to ensure quality of service at facilities level	International Health Regulations (2005): States Parties Self-assessment annual reporting tool, second edition.
Service delivery	Safe environment in health facilities: National standards and resources for safe built environment (ref_C9.3)	6.1. Governance and Management	6.1.2. Management of operations	6.1.2.3. Systems in place to ensure quality of service at facilities level	International Health Regulations (2005): States Parties Self-assessment annual reporting tool, second edition.
Service delivery	Specimen referral and transport system: Sustainable referral and transport systems, that are exercised (as appropriate) reviewed, evaluated and updated on a regular basis, are in place for all specimen types and requests for the diagnosis, confirmation,characterization of all specimens with complete coverage at all levels (ref_C4.1)	6.2. Access and Availability	6.2.1. Health Benefit Package	6.2.1.2. All elements or components of the health benefit package are being executed or operationalized within a health system.	International Health Regulations (2005): States Parties Self-assessment annual reporting tool, second edition.
Service delivery	National laboratory biosafety and biosecurity guidelines and/or regulations are exercised, reviewed, evaluated and updated on a regular basis, as applicable and a system for oversight of the regulation is in place (ref_C4.2)	6.2. Access and Availability	6.2.1. Health Benefit Package	6.2.1.2. All elements or components of the health benefit package are being executed or operationalized within a health system.	International Health Regulations (2005): States Parties Self-assessment annual reporting tool, second edition.
Service delivery	National quality system: National quality standards are implemented at all level including mandatory licensing of all laboratories in conformity with international quality standard and exercised, reviewed, evaluated and updated on a regular basis, as applicable (ref_C4.3)	6.1. Governance and Management	6.1.2. Management of operations	6.1.2.3. Systems in place to ensure quality of service at facilities level	International Health Regulations (2005): States Parties Self-assessment annual reporting tool, second edition.
Service delivery	lab testing capacity- lab system can perform in all capacities including access to whole genome sequencing (ref_C.4.4)	6.2. Access and Availability	6.2.1. Health Benefit Package	6.2.1.2. All elements or components of the health benefit package are being executed or operationalized within a health system.	International Health Regulations (2005): States Parties Self-assessment annual reporting tool, second edition.
Service delivery	effective national diagnostic network Tier-specific diagnostic testing strategies are being implemented at national, intermediate and local levels, and exercised, reviewed, evaluated, and updated on a regular basis, as applicable (ref_C4.5)	6.2. Access and Availability	6.2.1. Health Benefit Package	6.2.1.2. All elements or components of the health benefit package are being executed or operationalized within a health system.	International Health Regulations (2005): States Parties Self-assessment annual reporting tool, second edition.
Service delivery	Health centre/health post/GP practice density per 100 000 population. (ref_7.4.2.2)	6.1. Governance and Management	6.1.1. Service delivery planning employs balanced service delivery	6.1.1.1. Service delivery planning is data-informed, employs balanced service delivery, and ensures continuity of services during emergencies	Health system performance assessment: a framework for policy analysis Irene Papanicolas, Dheepa Rajan, Marina Karanikolos, Agnes Soucat, Josep Figueras
Service delivery	Percentage of persons aged 16+ reporting unmet needs for medical examination or treatment (EU+EEA)	6.2. Access and Availability	6.2.2. Service availability and readiness	6.2.2.2. Proportion of people in the most vulnerable areas provided with essential health services	Health system performance assessment: a framework for policy analysis Irene Papanicolas, Dheepa Rajan, Marina Karanikolos, Agnes Soucat, Josep Figueras
Service delivery	Preventable mortality(includes road traffic death rate; mortality from selected infectious diseases such as tuberculosis, cholera,malaria, HIV/AIDS, influenza)Where preventable mortality is not available as an aggregate measure, mortality from traffic injuries, selected infectious diseases etc.(SDG3.6.1) (ref_7.4.2.1)	6.1. Governance and Management	6.1.2. Management of operations	6.1.2.3. Systems in place to ensure quality of service at facilities level	Health system performance assessment: a framework for policy analysis Irene Papanicolas, Dheepa Rajan, Marina Karanikolos, Agnes Soucat, Josep Figueras
Service delivery	Child survival (under 5 years) SDG3.2.1 (U5 mortality rate (ref_7.4.2.1)	6.2. Access and Availability	6.2.2. Service availability and readiness	6.2.2.2. Proportion of people in the most vulnerable areas provided with essential health services	Health system performance assessment: a framework for policy analysis Irene Papanicolas, Dheepa Rajan, Marina Karanikolos, Agnes Soucat, Josep Figueras
Service delivery	Prevalence of child malnutrition( SDG2.2.2) (ref_7.4.2.1)	6.2. Access and Availability	6.2.1. Health Benefit Package	6.2.1.2. All elements or components of the health benefit package are being executed or operationalized within a health system.	Health system performance assessment: a framework for policy analysis Irene Papanicolas, Dheepa Rajan, Marina Karanikolos, Agnes Soucat, Josep Figueras
Service delivery	Vaccination coverage for different diseases (measles,polio, DTP3, etc.) SDG3.b.1 (ref_7.4.2.1)	6.2. Access and Availability	6.2.1. Health Benefit Package	6.2.1.2. All elements or components of the health benefit package are being executed or operationalized within a health system.	Health system performance assessment: a framework for policy analysis Irene Papanicolas, Dheepa Rajan, Marina Karanikolos, Agnes Soucat, Josep Figueras
Service delivery	Incidence rates of vaccine	6.2. Access and Availability	6.2.2. Service availability and readiness	6.2.2.2. Proportion of people in the most vulnerable areas provided with essential health services	Health system performance assessment: a framework for policy analysis Irene Papanicolas, Dheepa Rajan, Marina Karanikolos, Agnes Soucat, Josep Figueras
Service delivery	Mortality rate attributed to unsafe water, unsafe sanitation and lack of hygiene (exposure to unsafe Water, Sanitation and Hygiene For All (WASH) services) .SDG 3.9.2(ref_7.4.2.1)	6.1. Governance and Management	6.1.1. Service delivery planning employs balanced service delivery	6.1.1.1. Service delivery planning is data-informed, employs balanced service delivery, and ensures continuity of services during emergencies	Health system performance assessment: a framework for policy analysis Irene Papanicolas, Dheepa Rajan, Marina Karanikolos, Agnes Soucat, Josep Figueras
Service delivery	Prevalence of populations using unsafe or unimproved water sources. SDG6.1.1 (ref_7.4.2.1)	6.2. Access and Availability	6.2.1. Health Benefit Package	6.2.1.2. All elements or components of the health benefit package are being executed or operationalized within a health system.	Health system performance assessment: a framework for policy analysis Irene Papanicolas, Dheepa Rajan, Marina Karanikolos, Agnes Soucat, Josep Figueras
Service delivery	Above indicators of effectiveness at sub-national level/by population subgroup (for example, urban–rural,socioeconomic status) (ref_7.4.2.1)	6.2. Access and Availability	6.2.2. Service availability and readiness	6.2.2.2. Proportion of people in the most vulnerable areas provided with essential health services	Health system performance assessment: a framework for policy analysis Irene Papanicolas, Dheepa Rajan, Marina Karanikolos, Agnes Soucat, Josep Figueras
Service delivery	Amenable mortality (deaths that should have been prevented by timely and good quality care)(ref_7.4.2.2)	6.1. Governance and Management	6.1.2. Management of operations	6.1.2.3. Systems in place to ensure quality of service at facilities level	Health system performance assessment: a framework for policy analysis Irene Papanicolas, Dheepa Rajan, Marina Karanikolos, Agnes Soucat, Josep Figueras
Service delivery	Adherence to clinical guidelines for five clinical cases: · acute diarrhoea · pneumonia· diabetes mellitus· pulmonary tuberculosis· malaria with anaemia (ref_7.4.2.2)	6.1. Governance and Management	6.1.2. Management of operations	6.1.2.3. Systems in place to ensure quality of service at facilities level	Health system performance assessment: a framework for policy analysis Irene Papanicolas, Dheepa Rajan, Marina Karanikolos, Agnes Soucat, Josep Figueras
Service delivery	Quality antenatal care (percentage of women who reported having their blood pressure checked and giving a urine and blood sample at any point during pregnancy among those who sought care from skilled providers) (ref_7.4.2.2)	6.1. Governance and Management	6.1.2. Management of operations	6.1.2.3. Systems in place to ensure quality of service at facilities level	Health system performance assessment: a framework for policy analysis Irene Papanicolas, Dheepa Rajan, Marina Karanikolos, Agnes Soucat, Josep Figueras
Service delivery	Proportion of people with diabetes who are undiagnosed (20–79 years). (ref_7.4.2.2)	6.2. Access and Availability	6.2.2. Service availability and readiness	6.2.2.2. Proportion of people in the most vulnerable areas provided with essential health services	Health system performance assessment: a framework for policy analysis Irene Papanicolas, Dheepa Rajan, Marina Karanikolos, Agnes Soucat, Josep Figueras
Service delivery	Proportion of adult population on diabetes medication whose blood glucose is controlled (ref_7.4.2.2)	6.2. Access and Availability	6.2.1. Health Benefit Package	6.2.1.2. All elements or components of the health benefit package are being executed or operationalized within a health system.	Health system performance assessment: a framework for policy analysis Irene Papanicolas, Dheepa Rajan, Marina Karanikolos, Agnes Soucat, Josep Figueras
Service delivery	Diabetes-related lower extremity amputation rate (ref_7.4.2.2 )	6.1. Governance and Management	6.1.2. Management of operations	6.1.2.3. Systems in place to ensure quality of service at facilities level	Health system performance assessment: a framework for policy analysis Irene Papanicolas, Dheepa Rajan, Marina Karanikolos, Agnes Soucat, Josep Figueras
Service delivery	Hospital admission rate for people aged 15+ with:· hypertension· asthma· COPD· diabetes complications (ref_7.4.2.2 )	6.2. Access and Availability	6.2.2. Service availability and readiness	6.2.2.2. Proportion of people in the most vulnerable areas provided with essential health services	Health system performance assessment: a framework for policy analysis Irene Papanicolas, Dheepa Rajan, Marina Karanikolos, Agnes Soucat, Josep Figueras
Service delivery	Suicide mortality rate. SDG3.4.2 (ref_7.4.2.2 )	6.2. Access and Availability	6.2.1. Health Benefit Package	6.2.1.2. All elements or components of the health benefit package are being executed or operationalized within a health system.	Health system performance assessment: a framework for policy analysis Irene Papanicolas, Dheepa Rajan, Marina Karanikolos, Agnes Soucat, Josep Figueras
Service delivery	Minimum equipment availability (percentage of the number of pieces of essential equipment needed to provide effective and safe essential health services that are available and functioning) (ref_7.4.2.2 )	6.2. Access and Availability	6.2.1. Health Benefit Package	6.2.1.2. All elements or components of the health benefit package are being executed or operationalized within a health system.	Health system performance assessment: a framework for policy analysis Irene Papanicolas, Dheepa Rajan, Marina Karanikolos, Agnes Soucat, Josep Figueras
Service delivery	Patient reported medical,medication, and lab test error (percentage reporting) (ref_7.4.2.2 )	6.1. Governance and Management	6.1.2. Management of operations	6.1.2.3. Systems in place to ensure quality of service at facilities level	Health system performance assessment: a framework for policy analysis Irene Papanicolas, Dheepa Rajan, Marina Karanikolos, Agnes Soucat, Josep Figueras
Service delivery	The user’s regular physician explains care in a way that that is easy to understand (HIC) Rated as good or better a measure of how the provider listened at last outpatient visit (ref_7.4.2.2 )	6.1. Governance and Management	6.1.2. Management of operations	6.1.2.3. Systems in place to ensure quality of service at facilities level	Health system performance assessment: a framework for policy analysis Irene Papanicolas, Dheepa Rajan, Marina Karanikolos, Agnes Soucat, Josep Figueras
Service delivery	Perioperative mortality rate (ref_7.4.2.2 )	6.1. Governance and Management	6.1.2. Management of operations	6.1.2.3. Systems in place to ensure quality of service at facilities level	Health system performance assessment: a framework for policy analysis Irene Papanicolas, Dheepa Rajan, Marina Karanikolos, Agnes Soucat, Josep Figueras
Service delivery	in-hospital mortality rate within 30 days of admission for acute myocardial infarction or stroke (ref_7.4.2.3)	6.1. Governance and Management	6.1.2. Management of operations	6.1.2.3. Systems in place to ensure quality of service at facilities level	Health system performance assessment: a framework for policy analysis Irene Papanicolas, Dheepa Rajan, Marina Karanikolos, Agnes Soucat, Josep Figueras
Service delivery	Proportion of the population without access to safe,affordable surgery and anaesthesia (ref_7.4.2.3)	6.2. Access and Availability	6.2.2. Service availability and readiness	6.2.2.2. Proportion of people in the most vulnerable areas provided with essential health services	Health system performance assessment: a framework for policy analysis Irene Papanicolas, Dheepa Rajan, Marina Karanikolos, Agnes Soucat, Josep Figueras
Service delivery	Estimated percentage of seriously injured patients transported by ambulance (ref_7.4.2.3)	6.2. Access and Availability	6.2.2. Service availability and readiness	6.2.2.2. Proportion of people in the most vulnerable areas provided with essential health services	Health system performance assessment: a framework for policy analysis Irene Papanicolas, Dheepa Rajan, Marina Karanikolos, Agnes Soucat, Josep Figueras
Service delivery	Access to radiotherapy services (ref_7.4.2.3)	6.2. Access and Availability	6.2.1. Health Benefit Package	6.2.1.2. All elements or components of the health benefit package are being executed or operationalized within a health system.	Health system performance assessment: a framework for policy analysis Irene Papanicolas, Dheepa Rajan, Marina Karanikolos, Agnes Soucat, Josep Figueras
Service delivery	Proportion of the population without access to surgery (ref_7.4.2.3)	6.2. Access and Availability	6.2.1. Health Benefit Package	6.2.1.2. All elements or components of the health benefit package are being executed or operationalized within a health system.	Health system performance assessment: a framework for policy analysis Irene Papanicolas, Dheepa Rajan, Marina Karanikolos, Agnes Soucat, Josep Figueras
Service delivery	Above indicators of effectiveness at sub- national level/by population subgroup (for example, urban–rural,socioeconomic status) (ref_7.4.2.2)	6.2. Access and Availability	6.2.2. Service availability and readiness	6.2.2.2. Proportion of people in the most vulnerable areas provided with essential health services	Health system performance assessment: a framework for policy analysis Irene Papanicolas, Dheepa Rajan, Marina Karanikolos, Agnes Soucat, Josep Figueras
Service delivery	What degree of autonomy does the service delivery entity (facility, district, provider network, region) have to take operational, tactical and strategic decisions?(ref_7.4.3.4)	6.1. Governance and Management	6.1.2. Management of operations	6.1.2.2. Data informs decision-making, performance monitoring, and strategic planning at all levels.	Health system performance assessment: a framework for policy analysis Irene Papanicolas, Dheepa Rajan, Marina Karanikolos, Agnes Soucat, Josep Figueras
Service delivery	Existence of national-level strategy/plan/ policy to promote integrated service delivery (ref_7.4.3.4)	6.1. Governance and Management	6.1.1. Service delivery planning employs balanced service delivery	6.1.1.1. Service delivery planning is data-informed, employs balanced service delivery, and ensures continuity of services during emergencies	Health system performance assessment: a framework for policy analysis Irene Papanicolas, Dheepa Rajan, Marina Karanikolos, Agnes Soucat, Josep Figueras
Service delivery	Existence of national approaches for quality assurance of health services (ref_7.4.3.4)	6.1. Governance and Management	6.1.2. Management of operations	6.1.2.3. Systems in place to ensure quality of service at facilities level	Health system performance assessment: a framework for policy analysis Irene Papanicolas, Dheepa Rajan, Marina Karanikolos, Agnes Soucat, Josep Figueras
Service delivery	Prevalence of tobacco use.SGD3.a.1 Safety. (ref_7.4.2.1)	6.2. Access and Availability	6.2.1. Health Benefit Package	6.2.1.2. All elements or components of the health benefit package are being executed or operationalized within a health system.	Health system performance assessment: a framework for policy analysis Irene Papanicolas, Dheepa Rajan, Marina Karanikolos, Agnes Soucat, Josep Figueras
Service delivery	People living with HIV receiving ART	6.2. Access and Availability	6.2.1. Health Benefit Package	6.2.1.2. All elements or components of the health benefit package are being executed or operationalized within a health system.	Health system performance assessment: a framework for policy analysis Irene Papanicolas, Dheepa Rajan, Marina Karanikolos, Agnes Soucat, Josep Figueras
Service delivery	Percentage of women reporting barriers in access to care due to distance or percentage of women who report barriers in care access due to cost of treatment (ref_7.4.2.2)	6.2. Access and Availability	6.2.2. Service availability and readiness	6.2.2.2. Proportion of people in the most vulnerable areas provided with essential health services	Health system performance assessment: a framework for policy analysis Irene Papanicolas, Dheepa Rajan, Marina Karanikolos, Agnes Soucat, Josep Figueras
Medical products, vaccines and technologies	Access to essential medicines technologies as part of the fulfillment of the right to health, recognized in the constitution or national legislation (ref_4.4.1)	4.1.Governance	4.1.1. Governance of Medical Products and Technologies	4.1.1.1. Comprehensive National Policy that sets clear standards for medicines, vaccines, and health products, and includes multi-year planning	World Health Organization. Monitoring the Building Blocks of Health Systems: A Handbook of Indicators and Their Measurement Strategies. Geneva: World Health Organization, 2010.
Medical products, vaccines and technologies	Existence and year of last update of a published national medicines policy (ref_4.4.2)	4.1.Governance	4.1.1. Governance of Medical Products and Technologies	4.1.1.1. Comprehensive National Policy that sets clear standards for medicines, vaccines, and health products, and includes multi-year planning	World Health Organization. Monitoring the Building Blocks of Health Systems: A Handbook of Indicators and Their Measurement Strategies. Geneva: World Health Organization, 2010.
Medical products, vaccines and technologies	Legal provisions to allow/encourage generic substitution in the private sector (ref_4.4.4)	4.1.Governance	4.1.1. Governance of Medical Products and Technologies	4.1.1.1. Comprehensive National Policy that sets clear standards for medicines, vaccines, and health products, and includes multi-year planning	World Health Organization. Monitoring the Building Blocks of Health Systems: A Handbook of Indicators and Their Measurement Strategies. Geneva: World Health Organization, 2010.
Medical products, vaccines and technologies	Public and private per capita expenditure on medicines (national health accounts) Health Finance (ref_4.4.5)	4.1.Governance	4.1.1. Governance of Medical Products and Technologies	4.1.1.1. Comprehensive National Policy that sets clear standards for medicines, vaccines, and health products, and includes multi-year planning	World Health Organization. Monitoring the Building Blocks of Health Systems: A Handbook of Indicators and Their Measurement Strategies. Geneva: World Health Organization, 2010.
Medical products, vaccines and technologies	Percentage of population covered by health insurance (service delivery) (ref_4.4.6	4.1.Governance	4.1.1. Governance of Medical Products and Technologies	4.1.1.1. Comprehensive National Policy that sets clear standards for medicines, vaccines, and health products, and includes multi-year planning	World Health Organization. Monitoring the Building Blocks of Health Systems: A Handbook of Indicators and Their Measurement Strategies. Geneva: World Health Organization, 2010.
Medical products, vaccines and technologies	Percentage mark-up between manufacturers’ and consumer prices (ref_4.4.7)	4.1.Governance	4.1.1. Governance of Medical Products and Technologies	4.1.1.2. National Regulatory System meets criteria and functioning at national and subnational levels.	World Health Organization. Monitoring the Building Blocks of Health Systems: A Handbook of Indicators and Their Measurement Strategies. Geneva: World Health Organization, 2010.
Medical products, vaccines and technologies	Average availability of 14 selected essential medicines in public and private health facilities	4.3. Availability	4.3.1. Availability of Essential Medicines and medical products and equipment	4.3.1.2. Drugs in the EML available at national and subnational levels	World Health Organization. Monitoring the Building Blocks of Health Systems: A Handbook of Indicators and Their Measurement Strategies. Geneva: World Health Organization, 2010.
Medical products, vaccines and technologies	Median consumer price ratio of 14 selected essential medicines in public and private health facilities	4.3. Availability	4.3.1. Availability of Essential Medicines and medical products and equipment	4.3.1.2. Drugs in the EML available at national and subnational levels	World Health Organization. Monitoring the Building Blocks of Health Systems: A Handbook of Indicators and Their Measurement Strategies. Geneva: World Health Organization, 2010.
Medical products, vaccines and technologies	Existence and year of last update of a published national list of essential medicines	4.3. Availability	4.3.1. Availability of Essential Medicines and medical products and equipment	4.3.1.1.National Essential Medicines List (EML) aligns with the health priorities of the country and is regularly updated.	World Health Organization. Monitoring the Building Blocks of Health Systems: A Handbook of Indicators and Their Measurement Strategies. Geneva: World Health Organization, 2010.
Medical products, vaccines and technologies	National list of essential medicines is developed	4.3. Availability	4.3.1. Availability of Essential Medicines and medical products and equipment	4.3.1.1.National Essential Medicines List (EML) aligns with the health priorities of the country and is regularly updated.	Health system resilience indicators: an integrated package for measuring and monitoring health system resilience in countries
Medical products, vaccines and technologies	Regulatory mechanisms for medicines and other essential health products are established (ref_25)	4.1.Governance	4.1.1. Governance of Medical Products and Technologies	4.1.1.2. National Regulatory System meets criteria and functioning at national and subnational levels.	Health system resilience indicators: an integrated package for measuring and monitoring health system resilience in countries
Medical products, vaccines and technologies	Percentage of facilities with prepositioned public health emergency-relevant health products. (ref_26)	4.2.Supply Chain management	4.2.2. Timeliness of Distribution to Respond to Health Emergencies	4.2.2.1. Timely distribution to meet needs and system in place to ensure products are available in the event of a health emergency	Health system resilience indicators: an integrated package for measuring and monitoring health system resilience in countries
Medical products, vaccines and technologies	Percentage of health facilities that have a core set of relevant essential medicines available and affordable on a sustainable basis (ref_27)	4.3. Availability	4.3.1. Availability of Essential Medicines and medical products and equipment	4.3.1.3. No stock out in drugs listed in the EML at national and subnational levels	Health system resilience indicators: an integrated package for measuring and monitoring health system resilience in countries
Medical products, vaccines and technologies	Percentage of facilities that have experienced interruption in water supply in the previous week. (ref_28)	4.1.Governance	4.1.1. Governance of Medical Products and Technologies	4.1.1.1. Comprehensive National Policy that sets clear standards for medicines, vaccines, and health products, and includes multi-year planning	Health system resilience indicators: an integrated package for measuring and monitoring health system resilience in countries
Medical products, vaccines and technologies	Percentage of facilities that have experienced power outages in the previous week (ref_29)	4.1.Governance	4.1.1. Governance of Medical Products and Technologies	4.1.1.1. Comprehensive National Policy that sets clear standards for medicines, vaccines, and health products, and includes multi-year planning	Health system resilience indicators: an integrated package for measuring and monitoring health system resilience in countries
Medical products, vaccines and technologies	Percentage of facilities with availability of water, sanitation, and hygiene (WASH) amenities (ref_30)	4.3. Availability	4.3.1. Availability of Essential Medicines and medical products and equipment	4.3.1.3. No stock out in drugs listed in the EML at national and subnational levels	Health system resilience indicators: an integrated package for measuring and monitoring health system resilience in countries
Medical products, vaccines and technologies	Health facility density Total number of health facilities per 10 000 population	4.3. Availability	4.3.1. Availability of Essential Medicines and medical products and equipment	4.3.1.3. No stock out in drugs listed in the EML at national and subnational levels	Health system performance assessment: a framework for policy analysis Irene Papanicolas, Dheepa Rajan, Marina Karanikolos, Agnes Soucat, Josep Figueras
Medical products, vaccines and technologies	Total number of hospitals per 100 000 population	4.3. Availability	4.3.1. Availability of Essential Medicines and medical products and equipment	4.3.1.3. No stock out in drugs listed in the EML at national and subnational levels	Health system performance assessment: a framework for policy analysis Irene Papanicolas, Dheepa Rajan, Marina Karanikolos, Agnes Soucat, Josep Figueras
Medical products, vaccines and technologies	Health facility distribution Disaggregation by: · types of health care; it is recommended to categorize existing types across primary health care, first referral point of care, second referral point of care, etc. · location (district/province/national; rural/urban) · public/private sector	4.3. Availability	4.3.1. Availability of Essential Medicines and medical products and equipment	4.3.1.3. No stock out in drugs listed in the EML at national and subnational levels	Health system performance assessment: a framework for policy analysis Irene Papanicolas, Dheepa Rajan, Marina Karanikolos, Agnes Soucat, Josep Figueras
Medical products, vaccines and technologies	Hospital bed density and distribution Total number of hospital beds per 10 000 population Disaggregated by: ·type/ward	4.3. Availability	4.3.1. Availability of Essential Medicines and medical products and equipment	4.3.1.3. No stock out in drugs listed in the EML at national and subnational levels	Health system performance assessment: a framework for policy analysis Irene Papanicolas, Dheepa Rajan, Marina Karanikolos, Agnes Soucat, Josep Figueras
Medical products, vaccines and technologies	Medical equipment distribution (selection of priority medical equipment of high cost and high complexity) Disaggregation by:	4.3. Availability	4.3.1. Availability of Essential Medicines and medical products and equipment	4.3.1.3. No stock out in drugs listed in the EML at national and subnational levels	Health system performance assessment: a framework for policy analysis Irene Papanicolas, Dheepa Rajan, Marina Karanikolos, Agnes Soucat, Josep Figueras
Medical products, vaccines and technologies	Medical equipment density (selection of priority medical equipment of high cost and high complexity).	4.3. Availability	4.3.1. Availability of Essential Medicines and medical products and equipment	4.3.1.3. No stock out in drugs listed in the EML at national and subnational levels	Health system performance assessment: a framework for policy analysis Irene Papanicolas, Dheepa Rajan, Marina Karanikolos, Agnes Soucat, Josep Figueras
Medical products, vaccines and technologies	Selected priority medical equipment density per 1 000 000 population. The following priority medical equipment is recommended:Magnetic resonance imaging. Computerized tomography scanner. Position emission tomography scanner. Nuclear medicine	4.3. Availability	4.3.1. Availability of Essential Medicines and medical products and equipment	4.3.1.3. No stock out in drugs listed in the EML at national and subnational levels	Health system performance assessment: a framework for policy analysis Irene Papanicolas, Dheepa Rajan, Marina Karanikolos, Agnes Soucat, Josep Figueras
Medical products, vaccines and technologies	Existence of a medical device nomenclature system	4.1.Governance	4.1.1. Governance of Medical Products and Technologies	4.1.1.2. National Regulatory System meets criteria and functioning at national and subnational levels.	Health system performance assessment: a framework for policy analysis Irene Papanicolas, Dheepa Rajan, Marina Karanikolos, Agnes Soucat, Josep Figueras
Medical products, vaccines and technologies	Existence of an eHealth strategy or policy	4.1.Governance	4.1.1. Governance of Medical Products and Technologies	4.1.1.1. Comprehensive National Policy that sets clear standards for medicines, vaccines, and health products, and includes multi-year planning	Health system performance assessment: a framework for policy analysis Irene Papanicolas, Dheepa Rajan, Marina Karanikolos, Agnes Soucat, Josep Figueras
Medical products, vaccines and technologies	Existence of health technology (medical device) policy	4.1.Governance	4.1.1. Governance of Medical Products and Technologies	4.1.1.1. Comprehensive National Policy that sets clear standards for medicines, vaccines, and health products, and includes multi-year planning	Health system performance assessment: a framework for policy analysis Irene Papanicolas, Dheepa Rajan, Marina Karanikolos, Agnes Soucat, Josep Figueras
Medical products, vaccines and technologies	Existence of lists of approved medical devices for public procurement or reimbursement (Resource planning) ( policy analysis) (5.4.4.2)	4.3. Availability	4.3.1. Availability of Essential Medicines and medical products and equipment	4.3.1.1.National Essential Medicines List (EML) aligns with the health priorities of the country and is regularly updated.	Health system performance assessment: a framework for policy analysis Irene Papanicolas, Dheepa Rajan, Marina Karanikolos, Agnes Soucat, Josep Figueras
Medical products, vaccines and technologies	Existence of List of National Essential Medicines	4.3. Availability	4.3.1. Availability of Essential Medicines and medical products and equipment	4.3.1.1.National Essential Medicines List (EML) aligns with the health priorities of the country and is regularly updated.	Health system performance assessment: a framework for policy analysis Irene Papanicolas, Dheepa Rajan, Marina Karanikolos, Agnes Soucat, Josep Figueras
Medical products, vaccines and technologies	Ministry of Health responsibility for health technology policy implementation	4.1.Governance	4.1.1. Governance of Medical Products and Technologies	4.1.1.1. Comprehensive National Policy that sets clear standards for medicines, vaccines, and health products, and includes multi-year planning	Health system performance assessment: a framework for policy analysis Irene Papanicolas, Dheepa Rajan, Marina Karanikolos, Agnes Soucat, Josep Figueras
Medical products, vaccines and technologies	Percentage of treatment sites that received all orders in full, and on time, during a defined period	4.3. Availability	4.3.1. Availability of Essential Medicines and medical products and equipment	4.3.1.3. No stock out in drugs listed in the EML at national and subnational levels	Health system performance assessment: a framework for policy analysis Irene Papanicolas, Dheepa Rajan, Marina Karanikolos, Agnes Soucat, Josep Figueras
Medical products, vaccines and technologies	Percentage of medicine outlets in which the medicine was found on the day of data collection.	4.3. Availability	4.3.1. Availability of Essential Medicines and medical products and equipment	4.3.1.3. No stock out in drugs listed in the EML at national and subnational levels	Health system performance assessment: a framework for policy analysis Irene Papanicolas, Dheepa Rajan, Marina Karanikolos, Agnes Soucat, Josep Figueras
Medical products, vaccines and technologies	Percentage of facilities with electronic health management information systems. Percentage of facilities that have electronic reporting systems and percentage of elements that are digital	4.3. Availability	4.3.1. Availability of Essential Medicines and medical products and equipment	4.3.1.3. No stock out in drugs listed in the EML at national and subnational levels	Health system performance assessment: a framework for policy analysis Irene Papanicolas, Dheepa Rajan, Marina Karanikolos, Agnes Soucat, Josep Figueras
Medical products, vaccines and technologies	Percentage of facilities using electronic health records.( Availability) (real-time, patient-centred records that provide immediate and secure information to authorized users)	4.1.Governance	4.1.1. Governance of Medical Products and Technologies	4.1.1.1. Comprehensive National Policy that sets clear standards for medicines, vaccines, and health products, and includes multi-year planning	Health system performance assessment: a framework for policy analysis Irene Papanicolas, Dheepa Rajan, Marina Karanikolos, Agnes Soucat, Josep Figueras
Medical products, vaccines and technologies	Building and grounds maintenance	4.1.Governance	4.1.1. Governance of Medical Products and Technologies	4.1.1.1. Comprehensive National Policy that sets clear standards for medicines, vaccines, and health products, and includes multi-year planning	Health system performance assessment: a framework for policy analysis Irene Papanicolas, Dheepa Rajan, Marina Karanikolos, Agnes Soucat, Josep Figueras
Medical products, vaccines and technologies	Maintenance and repair systems for medical equipment	4.1.Governance	4.1.1. Governance of Medical Products and Technologies	4.1.1.2. National Regulatory System meets criteria and functioning at national and subnational levels.	Health system performance assessment: a framework for policy analysis Irene Papanicolas, Dheepa Rajan, Marina Karanikolos, Agnes Soucat, Josep Figueras
Medical products, vaccines and technologies	Unexpired essential medicines in medicine outlets are available	4.3. Availability	4.3.1. Availability of Essential Medicines and medical products and equipment	4.3.1.3. No stock out in drugs listed in the EML at national and subnational levels	Health system performance assessment: a framework for policy analysis Irene Papanicolas, Dheepa Rajan, Marina Karanikolos, Agnes Soucat, Josep Figueras
Medical products, vaccines and technologies	Percentage of treatment sites that received all orders in full and on time during a defined period	4.3. Availability	4.3.1. Availability of Essential Medicines and medical products and equipment	4.3.1.3. No stock out in drugs listed in the EML at national and subnational levels	Health system performance assessment: a framework for policy analysis Irene Papanicolas, Dheepa Rajan, Marina Karanikolos, Agnes Soucat, Josep Figueras
Medical products, vaccines and technologies	Percentage of households more than 5/10/20 km from a health facility/pharmacy that is expected to dispense essential medicines	4.3. Availability	4.3.1. Availability of Essential Medicines and medical products and equipment	4.3.1.3. No stock out in drugs listed in the EML at national and subnational levels	Health system performance assessment: a framework for policy analysis Irene Papanicolas, Dheepa Rajan, Marina Karanikolos, Agnes Soucat, Josep Figueras
Medical products, vaccines and technologies	Existence, comprehensiveness, and flexibility of pharmaceutical policy, legislation and regulation. This includes the functioning and political backing of the drug regulatory authority and the	4.1.Governance	4.1.1. Governance of Medical Products and Technologies	4.1.1.1. Comprehensive National Policy that sets clear standards for medicines, vaccines, and health products, and includes multi-year planning	Health system performance assessment: a framework for policy analysis Irene Papanicolas, Dheepa Rajan, Marina Karanikolos, Agnes Soucat, Josep Figueras
Medical products, vaccines and technologies	transparency of decisions for stakeholders.	4.1.Governance	4.1.1. Governance of Medical Products and Technologies	4.1.1.1. Comprehensive National Policy that sets clear standards for medicines, vaccines, and health products, and includes multi-year planning	Health system performance assessment: a framework for policy analysis Irene Papanicolas, Dheepa Rajan, Marina Karanikolos, Agnes Soucat, Josep Figueras
Medical products, vaccines and technologies	Ministry of Health responsibility for health technology policy implementation	4.1.Governance	4.1.1. Governance of Medical Products and Technologies	4.1.1.1. Comprehensive National Policy that sets clear standards for medicines, vaccines, and health products, and includes multi-year planning	Health system performance assessment: a framework for policy analysis Irene Papanicolas, Dheepa Rajan, Marina Karanikolos, Agnes Soucat, Josep Figueras
Medical products, vaccines and technologies	Are pharmaceuticals and other consumables monitored for quality?	4.1.Governance	4.1.1. Governance of Medical Products and Technologies	4.1.1.2. National Regulatory System meets criteria and functioning at national and subnational levels.	Health system performance assessment: a framework for policy analysis Irene Papanicolas, Dheepa Rajan, Marina Karanikolos, Agnes Soucat, Josep Figueras
Medical products, vaccines and technologies	Mechanisms exist for licensing and inspection of pharmaceutical establishments (ref_9)	4.1.Governance	4.1.1. Governance of Medical Products and Technologies	4.1.1.2. National Regulatory System meets criteria and functioning at national and subnational levels.	United States Agency for International Development (USAID). (2017). The Health Systems Assessment Approach: A how-to manual. Version 3.0.
Medical products, vaccines and technologies	Existence of a code of conduct that applies to public officials and staff involved in pharmaceutical- related activities or posts, and evidence that it is being applied (ref_10)	4.1.Governance	4.1.1. Governance of Medical Products and Technologies	4.1.1.1. Comprehensive National Policy that sets clear standards for medicines, vaccines, and health products, and includes multi-year planning	United States Agency for International Development (USAID). (2017). The Health Systems Assessment Approach: A how-to manual. Version 3.0.
Medical products, vaccines and technologies	Existence of conflict-of-interest guidelines that applies to public officials and staff involved in pharmaceutical- related activities or posts, and evidence that it is being applied (ref_11)	4.1.Governance	4.1.1. Governance of Medical Products and Technologies	4.1.1.1. Comprehensive National Policy that sets clear standards for medicines, vaccines, and health products, and includes multi-year planning	United States Agency for International Development (USAID). (2017). The Health Systems Assessment Approach: A how-to manual. Version 3.0.
Medical products, vaccines and technologies	Existence of an NEML published within the past 5 years (ref_18)	4.3. Availability	4.3.1. Availability of Essential Medicines and medical products and equipment	4.3.1.1.National Essential Medicines List (EML) aligns with the health priorities of the country and is regularly updated.	United States Agency for International Development (USAID). (2017). The Health Systems Assessment Approach: A how-to manual. Version 3.0.
Medical products, vaccines and technologies	Evidence of an active national committee responsible for managing the process of Maintaining an NEML (ref_19)	4.3. Availability	4.3.1. Availability of Essential Medicines and medical products and equipment	4.3.1.1.National Essential Medicines List (EML) aligns with the health priorities of the country and is regularly updated.	United States Agency for International Development (USAID). (2017). The Health Systems Assessment Approach: A how-to manual. Version 3.0.
Medical products, vaccines and technologies	Total number of pharmaceuticals on the NEML? (ref_20)	4.3. Availability	4.3.1. Availability of Essential Medicines and medical products and equipment	4.3.1.1.National Essential Medicines List (EML) aligns with the health priorities of the country and is regularly updated.	United States Agency for International Development (USAID). (2017). The Health Systems Assessment Approach: A how-to manual. Version 3.0.
Medical products, vaccines and technologies	Total expenditure on pharmaceuticals (percentage total expenditure on health) (ref_12)	4.1.Governance	4.1.1. Governance of Medical Products and Technologies	4.1.1.1. Comprehensive National Policy that sets clear standards for medicines, vaccines, and health products, and includes multi-year planning	United States Agency for International Development (USAID). (2017). The Health Systems Assessment Approach: A how-to manual. Version 3.0.
Medical products, vaccines and technologies	Total expenditure on pharmaceuticals (per capita at average exchange rate) in U.S. dollars) (ref_13)	4.1.Governance	4.1.1. Governance of Medical Products and Technologies	4.1.1.1. Comprehensive National Policy that sets clear standards for medicines, vaccines, and health products, and includes multi-year planning	United States Agency for International Development (USAID). (2017). The Health Systems Assessment Approach: A how-to manual. Version 3.0.
Medical products, vaccines and technologies	Government expenditure on pharmaceuticals (per capita at average exchange rate) in U.S. dollars (ref_14)	4.1.Governance	4.1.1. Governance of Medical Products and Technologies	4.1.1.1. Comprehensive National Policy that sets clear standards for medicines, vaccines, and health products, and includes multi-year planning	United States Agency for International Development (USAID). (2017). The Health Systems Assessment Approach: A how-to manual. Version 3.0.
Medical products, vaccines and technologies	Proportion of annual national expenditure on pharmaceuticals financed by different stakeholders(ref_15)	4.1.Governance	4.1.1. Governance of Medical Products and Technologies	4.1.1.1. Comprehensive National Policy that sets clear standards for medicines, vaccines, and health products, and includes multi-year planning	United States Agency for International Development (USAID). (2017). The Health Systems Assessment Approach: A how-to manual. Version 3.0.
Medical products, vaccines and technologies	Percentage of out-of-pocket expenditure for health spent on medicines, health finance (ref_16)	4.1.Governance	4.1.1. Governance of Medical Products and Technologies	4.1.1.1. Comprehensive National Policy that sets clear standards for medicines, vaccines, and health products, and includes multi-year planning	United States Agency for International Development (USAID). (2017). The Health Systems Assessment Approach: A how-to manual. Version 3.0.
Medical products, vaccines and technologies	Percentage of respondents who indicate that they forego medicines due to cost (ref_17)	4.3. Availability	4.3.1. Availability of Essential Medicines and medical products and equipment	4.3.1.3. No stock out in drugs listed in the EML at national and subnational levels	United States Agency for International Development (USAID). (2017). The Health Systems Assessment Approach: A how-to manual. Version 3.0.
Medical products, vaccines and technologies	Product selection for procurement based on NEML (ref_21)	4.3. Availability	4.3.1. Availability of Essential Medicines and medical products and equipment	4.3.1.1.National Essential Medicines List (EML) aligns with the health priorities of the country and is regularly updated.	United States Agency for International Development (USAID). (2017). The Health Systems Assessment Approach: A how-to manual. Version 3.0.
Medical products, vaccines and technologies	Pharmaceuticals procured based on reliable estimates (ref_23)	4.1.Governance	4.1.2. Public Procurement System	4.1.2.1. Public Procurement systems meet national and international standards with transparency and accountability	United States Agency for International Development (USAID). (2017). The Health Systems Assessment Approach: A how-to manual. Version 3.0.
Medical products, vaccines and technologies	Existence of a formal written procurement Policy (ref_24)	4.1.Governance	4.1.2. Public Procurement System	4.1.2.1. Public Procurement systems meet national and international standards with transparency and accountability	United States Agency for International Development (USAID). (2017). The Health Systems Assessment Approach: A how-to manual. Version 3.0.
Medical products, vaccines and technologies	Existence of formal SOPs for conducting procurement of pharmaceuticals (ref_25)	4.1.Governance	4.1.2. Public Procurement System	4.1.2.1. Public Procurement systems meet national and international standards with transparency and accountability	United States Agency for International Development (USAID). (2017). The Health Systems Assessment Approach: A how-to manual. Version 3.0.
Medical products, vaccines and technologies	Use of generic or INN for public procurement (ref_26)	4.1.Governance	4.1.2. Public Procurement System	4.1.2.1. Public Procurement systems meet national and international standards with transparency and accountability	United States Agency for International Development (USAID). (2017). The Health Systems Assessment Approach: A how-to manual. Version 3.0.
Medical products, vaccines and technologies	Percentage (by value) of MOH pharmaceuticals procured through competitive bids (ref_27)	4.1.Governance	4.1.2. Public Procurement System	4.1.2.1. Public Procurement systems meet national and international standards with transparency and accountability	United States Agency for International Development (USAID). (2017). The Health Systems Assessment Approach: A how-to manual. Version 3.0.
Medical products, vaccines and technologies	Existence and application of a procurement prequalification or post-qualification process for suppliers and products (ref_28)	4.1.Governance	4.1.2. Public Procurement System	4.1.2.1. Public Procurement systems meet national and international standards with transparency and accountability	United States Agency for International Development (USAID). (2017). The Health Systems Assessment Approach: A how-to manual. Version 3.0.
Medical products, vaccines and technologies	Average lead time for contract/purchase order issue (ref_29)	4.1.Governance	4.1.2. Public Procurement System	4.1.2.1. Public Procurement systems meet national and international standards with transparency and accountability	United States Agency for International Development (USAID). (2017). The Health Systems Assessment Approach: A how-to manual. Version 3.0.
Medical products, vaccines and technologies	Percentage of products procured according to plan (ref_30)	4.1.Governance	4.1.2. Public Procurement System	4.1.2.1. Public Procurement systems meet national and international standards with transparency and accountability	United States Agency for International Development (USAID). (2017). The Health Systems Assessment Approach: A how-to manual. Version 3.0.
Medical products, vaccines and technologies	Percentage of median international price paid for a set of tracer medicines that was part of the last regular MOH procurement Distribution (ref_31)	4.1.Governance	4.1.2. Public Procurement System	4.1.2.1. Public Procurement systems meet national and international standards with transparency and accountability	United States Agency for International Development (USAID). (2017). The Health Systems Assessment Approach: A how-to manual. Version 3.0.
Medical products, vaccines and technologies	Existence of SOPs for each level of the distribution system (ref_32)	4.1.Governance	4.1.1. Governance of Medical Products and Technologies	4.1.1.1. Comprehensive National Policy that sets clear standards for medicines, vaccines, and health products, and includes multi-year planning	United States Agency for International Development (USAID). (2017). The Health Systems Assessment Approach: A how-to manual. Version 3.0.
Medical products, vaccines and technologies	Order fill rate? (ref_33)	4.2.Supply Chain management	4.2.2. Timeliness of Distribution to Respond to Health Emergencies	4.2.2.1. Timely distribution to meet needs and system in place to ensure products are available in the event of a health emergency	United States Agency for International Development (USAID). (2017). The Health Systems Assessment Approach: A how-to manual. Version 3.0.
Medical products, vaccines and technologies	Inventory average accuracy rate Storage (ref_34)	4.2.Supply Chain management	4.2.1. Storage of Medical Products at National and Subnational levels	4.2.1.1. Medical stores at national and subnational levels comply with WHO good storage practices.	United States Agency for International Development (USAID). (2017). The Health Systems Assessment Approach: A how-to manual. Version 3.0.
Medical products, vaccines and technologies	Percentage of storage facilities meeting Acceptable storage conditions (ref_35)	4.2.Supply Chain management	4.2.1. Storage of Medical Products at National and Subnational levels	4.2.1.1. Medical stores at national and subnational levels comply with WHO good storage practices.	United States Agency for International Development (USAID). (2017). The Health Systems Assessment Approach: A how-to manual. Version 3.0.
Medical products, vaccines and technologies	Percentage of public/MOH storage units and health facilities with up-to-date refrigerator temperature monitoring records at each level of the distribution system (ref_36)	4.2.Supply Chain management	4.2.1. Storage of Medical Products at National and Subnational levels	4.2.1.1. Medical stores at national and subnational levels comply with WHO good storage practices.	United States Agency for International Development (USAID). (2017). The Health Systems Assessment Approach: A how-to manual. Version 3.0.
Medical products, vaccines and technologies	Existence of appropriate procedures for disposal of expired and/or spoiled medicines at medical stores/health facilities(ref_37)	4.2.Supply Chain management	4.2.1. Storage of Medical Products at National and Subnational levels	4.2.1.1. Medical stores at national and subnational levels comply with WHO good storage practices.	United States Agency for International Development (USAID). (2017). The Health Systems Assessment Approach: A how-to manual. Version 3.0.
Medical products, vaccines and technologies	Average transportation cost per km/volume/weight (ref_38)	4.3. Availability	4.3.1. Availability of Essential Medicines and medical products and equipment	4.3.1.3. No stock out in drugs listed in the EML at national and subnational levels	United States Agency for International Development (USAID). (2017). The Health Systems Assessment Approach: A how-to manual. Version 3.0.
Medical products, vaccines and technologies	Value of inventory loss (ref_39)	4.3. Availability	4.3.1. Availability of Essential Medicines and medical products and equipment	4.3.1.3. No stock out in drugs listed in the EML at national and subnational levels	United States Agency for International Development (USAID). (2017). The Health Systems Assessment Approach: A how-to manual. Version 3.0.
Medical products, vaccines and technologies	Existence of national therapeuti guidelines with standardized treatments for Common conditions (ref_44)	4.1.Governance	4.1.1. Governance of Medical Products and Technologies	4.1.1.2. National Regulatory System meets criteria and functioning at national and subnational levels.	United States Agency for International Development (USAID). (2017). The Health Systems Assessment Approach: A how-to manual. Version 3.0.
Medical products, vaccines and technologies	STGs used for pre- and in-service training of health personnel in both public and private sector (ref_45)	4.1.Governance	4.1.1. Governance of Medical Products and Technologies	4.1.1.2. National Regulatory System meets criteria and functioning at national and subnational levels.	United States Agency for International Development (USAID). (2017). The Health Systems Assessment Approach: A how-to manual. Version 3.0.
Medical products, vaccines and technologies	Percentage of medicines prescribed based on national STG, an essential medicines list or formulary (ref_46)	4.1.Governance	4.1.1. Governance of Medical Products and Technologies	4.1.1.2. National Regulatory System meets criteria and functioning at national and subnational levels.	United States Agency for International Development (USAID). (2017). The Health Systems Assessment Approach: A how-to manual. Version 3.0.
Medical products, vaccines and technologies	SOPs for dispensing and medication counseling available Management (ref_47)	4.1.Governance	4.1.1. Governance of Medical Products and Technologies	4.1.1.2. National Regulatory System meets criteria and functioning at national and subnational levels.	United States Agency for International Development (USAID). (2017). The Health Systems Assessment Approach: A how-to manual. Version 3.0.
Medical products, vaccines and technologies	Percentage of health facilities that completed and submitted an LMIS report for the most recent reporting period. (health information system) (ref_48)	4.1.Governance	4.1.1. Governance of Medical Products and Technologies	4.1.1.1. Comprehensive National Policy that sets clear standards for medicines, vaccines, and health products, and includes multi-year planning	United States Agency for International Development (USAID). (2017). The Health Systems Assessment Approach: A how-to manual. Version 3.0.
Medical products, vaccines and technologies	Number of licensed pharmacist and pharmacy technician per 100,000 population. Health workforce (ref_50)	4.3. Availability	4.3.1. Availability of Essential Medicines and medical products and equipment	4.3.1.3. No stock out in drugs listed in the EML at national and subnational levels	United States Agency for International Development (USAID). (2017). The Health Systems Assessment Approach: A how-to manual. Version 3.0.
Medical products, vaccines and technologies	Percentage of facilities with staff trained in stock management (service delivery) (ref_51)	4.3. Availability	4.3.1. Availability of Essential Medicines and medical products and equipment	4.3.1.3. No stock out in drugs listed in the EML at national and subnational levels	United States Agency for International Development (USAID). (2017). The Health Systems Assessment Approach: A how-to manual. Version 3.0.
Medical products, vaccines and technologies	Percentage of facilities that received monitoring visits for pharmaceutical management during the previous 6 months.(service delivery) (ref_52)	4.3. Availability	4.3.1. Availability of Essential Medicines and medical products and equipment	4.3.1.3. No stock out in drugs listed in the EML at national and subnational levels	United States Agency for International Development (USAID). (2017). The Health Systems Assessment Approach: A how-to manual. Version 3.0.
Medical products, vaccines and technologies	Existence of a National Medicine Policy (ref_1)	4.1.Governance	4.1.1. Governance of Medical Products and Technologies	4.1.1.1. Comprehensive National Policy that sets clear standards for medicines, vaccines, and health products, and includes multi-year planning	United States Agency for International Development (USAID). (2017). The Health Systems Assessment Approach: A how-to manual. Version 3.0.
Medical products, vaccines and technologies	Existence of pharmaceutical sector strategic plan (ref_2)	4.1.Governance	4.1.1. Governance of Medical Products and Technologies	4.1.1.1. Comprehensive National Policy that sets clear standards for medicines, vaccines, and health products, and includes multi-year planning	United States Agency for International Development (USAID). (2017). The Health Systems Assessment Approach: A how-to manual. Version 3.0.
Medical products, vaccines and technologies	Existence of Comprehensive Pharmaceutical Law (ref_3)	4.1.Governance	4.1.1. Governance of Medical Products and Technologies	4.1.1.1. Comprehensive National Policy that sets clear standards for medicines, vaccines, and health products, and includes multi-year planning	United States Agency for International Development (USAID). (2017). The Health Systems Assessment Approach: A how-to manual. Version 3.0.
Medical products, vaccines and technologies	Existence of a functioning MNRA (ref_4)	4.1.Governance	4.1.1. Governance of Medical Products and Technologies	4.1.1.2. National Regulatory System meets criteria and functioning at national and subnational levels.	United States Agency for International Development (USAID). (2017). The Health Systems Assessment Approach: A how-to manual. Version 3.0.
Medical products, vaccines and technologies	Existence of National quality Control Laboratory (ref_5)	4.1.Governance	4.1.1. Governance of Medical Products and Technologies	4.1.1.2. National Regulatory System meets criteria and functioning at national and subnational levels.	United States Agency for International Development (USAID). (2017). The Health Systems Assessment Approach: A how-to manual. Version 3.0.
Medical products, vaccines and technologies	Existence of a functioning system for pharmaceutical registration (ref_6)	4.1.Governance	4.1.1. Governance of Medical Products and Technologies	4.1.1.2. National Regulatory System meets criteria and functioning at national and subnational levels.	United States Agency for International Development (USAID). (2017). The Health Systems Assessment Approach: A how-to manual. Version 3.0.
Medical products, vaccines and technologies	Existence of a pharmaco-vigilance system (ref_7)	4.1.Governance	4.1.1. Governance of Medical Products and Technologies	4.1.1.2. National Regulatory System meets criteria and functioning at national and subnational levels.	United States Agency for International Development (USAID). (2017). The Health Systems Assessment Approach: A how-to manual. Version 3.0.
Medical products, vaccines and technologies	Existence of a post-marketing quality surveillance system (ref_8)	4.1.Governance	4.1.1. Governance of Medical Products and Technologies	4.1.1.2. National Regulatory System meets criteria and functioning at national and subnational levels.	United States Agency for International Development (USAID). (2017). The Health Systems Assessment Approach: A how-to manual. Version 3.0.
Medical products, vaccines and technologies	Percentage of households more than 5/10/20 km from health facility/pharmacy that is expected to dispense essential medicines (40) .	4.1.Governance	4.1.1. Governance of Medical Products and Technologies	4.1.1.1. Comprehensive National Policy that sets clear standards for medicines, vaccines, and health products, and includes multi-year planning	United States Agency for International Development (USAID). (2017). The Health Systems Assessment Approach: A how-to manual. Version 3.0.
Medical products, vaccines and technologies	Percentage of a set of unexpired tracer items available (41)	4.2.Supply Chain management	4.2.1. Storage of Medical Products at National and Subnational levels	4.2.1.1. Medical stores at national and subnational levels comply with WHO good storage practices.	United States Agency for International Development (USAID). (2017). The Health Systems Assessment Approach: A how-to manual. Version 3.0.
Medical products, vaccines and technologies	Median consumer price ratio of 14 selected essential medicines in public and private health facilities (42)	4.1.Governance	4.1.2. Public Procurement System	4.1.2.1. Public Procurement systems meet national and international standards with transparency and accountability	United States Agency for International Development (USAID). (2017). The Health Systems Assessment Approach: A how-to manual. Version 3.0.
Medical products, vaccines and technologies	Existence of functioning drugs and therapeutic committees (DTC) or other mechanisms to improve prescribing and Dispensing practices (43)	4.1.Governance	4.1.1. Governance of Medical Products and Technologies	4.1.1.2. National Regulatory System meets criteria and functioning at national and subnational levels.	United States Agency for International Development (USAID). (2017). The Health Systems Assessment Approach: A how-to manual. Version 3.0.
Medical products, vaccines and technologies	Existence of a computerized registration system that facilitates retrieval of information on registered products, licensed Providers and premises and clinical trials (REF_49)	4.1.Governance	4.1.1. Governance of Medical Products and Technologies	4.1.1.2. National Regulatory System meets criteria and functioning at national and subnational levels.	United States Agency for International Development (USAID). (2017). The Health Systems Assessment Approach: A how-to manual. Version 3.0.
Health information systems	Country has a 10-year costed survey plan that covers all priority health topics and takes into account other relevant data sources	3.1. Health information system governance and management	3.1.1. National Health Information system	3.1.1.1. National Health information system meets criteria, functional and responsive to health sector needs	World Health Organization. Monitoring the Building Blocks of Health Systems: A Handbook of Indicators and Their Measurement Strategies. Geneva: World Health Organization, 2010.
Health information systems	Two or more data points available for child mortality in the past five years	3.1. Health information system governance and management	3.1.2. Data Quality	3.1.2.1. Data quality is consistently monitored through a national mechanism that ensurs accuracy, reliability, and consistency of reported health data.	World Health Organization. Monitoring the Building Blocks of Health Systems: A Handbook of Indicators and Their Measurement Strategies. Geneva: World Health Organization, 2010.
Health information systems	Two or more population-based data points for maternal mortality in the past 10 years, including one in the past five years	3.1. Health information system governance and management	3.1.2. Data Quality	3.1.2.1. Data quality is consistently monitored through a national mechanism that ensurs accuracy, reliability, and consistency of reported health data.	World Health Organization. Monitoring the Building Blocks of Health Systems: A Handbook of Indicators and Their Measurement Strategies. Geneva: World Health Organization, 2010.
Health information systems	Two or more data points for coverage of key health interventions in the past five years	3.1. Health information system governance and management	3.1.2. Data Quality	3.1.2.1. Data quality is consistently monitored through a national mechanism that ensurs accuracy, reliability, and consistency of reported health data.	World Health Organization. Monitoring the Building Blocks of Health Systems: A Handbook of Indicators and Their Measurement Strategies. Geneva: World Health Organization, 2010.
Health information systems	One or more data points on smoking and adult nutritional status in the past five years.	3.1. Health information system governance and management	3.1.2. Data Quality	3.1.2.1. Data quality is consistently monitored through a national mechanism that ensurs accuracy, reliability, and consistency of reported health data.	World Health Organization. Monitoring the Building Blocks of Health Systems: A Handbook of Indicators and Their Measurement Strategies. Geneva: World Health Organization, 2010.
Health information systems	Birth registration of at least 90% of all births (intermediate goal 50%). Indicator: percentage of births registered	3.1. Health information system governance and management	3.1.2. Data Quality	3.1.2.1. Data quality is consistently monitored through a national mechanism that ensurs accuracy, reliability, and consistency of reported health data.	World Health Organization. Monitoring the Building Blocks of Health Systems: A Handbook of Indicators and Their Measurement Strategies. Geneva: World Health Organization, 2010.
Health information systems	Death registration of at least 90% of all deaths (intermediate goal 50%). Indicator: percentage of deaths registered	3.1. Health information system governance and management	3.1.2. Data Quality	3.1.2.1. Data quality is consistently monitored through a national mechanism that ensurs accuracy, reliability, and consistency of reported health data.	World Health Organization. Monitoring the Building Blocks of Health Systems: A Handbook of Indicators and Their Measurement Strategies. Geneva: World Health Organization, 2010.
Health information systems	ICD-10d used in district hospitals and causes of death reported to national level	3.1. Health information system governance and management	3.1.2. Data Quality	3.1.2.1. Data quality is consistently monitored through a national mechanism that ensurs accuracy, reliability, and consistency of reported health data.	World Health Organization. Monitoring the Building Blocks of Health Systems: A Handbook of Indicators and Their Measurement Strategies. Geneva: World Health Organization, 2010.
Health information systems	Census completed within the past 10 years	3.1. Health information system governance and management	3.1.1. National Health Information system	3.1.1.1. National Health information system meets criteria, functional and responsive to health sector needs	World Health Organization. Monitoring the Building Blocks of Health Systems: A Handbook of Indicators and Their Measurement Strategies. Geneva: World Health Organization, 2010.
Health information systems	Population projections for districts and smaller administrative areas available for next 10 years, in print and electronically, well documented	3.1. Health information system governance and management	3.1.2. Data Quality	3.1.2.1. Data quality is consistently monitored through a national mechanism that ensurs accuracy, reliability, and consistency of reported health data.	World Health Organization. Monitoring the Building Blocks of Health Systems: A Handbook of Indicators and Their Measurement Strategies. Geneva: World Health Organization, 2010.
Health information systems	Number of institutional deliveries available, by district, and published within 12 months of preceding year	3.1. Health information system governance and management	3.1.2. Data Quality	3.1.2.1. Data quality is consistently monitored through a national mechanism that ensurs accuracy, reliability, and consistency of reported health data.	World Health Organization. Monitoring the Building Blocks of Health Systems: A Handbook of Indicators and Their Measurement Strategies. Geneva: World Health Organization, 2010.
Health information systems	HIV prevalence for relevant surveillance populations published within 12 months of preceding year	3.1. Health information system governance and management	3.1.2. Data Quality	3.1.2.1. Data quality is consistently monitored through a national mechanism that ensurs accuracy, reliability, and consistency of reported health data.	World Health Organization. Monitoring the Building Blocks of Health Systems: A Handbook of Indicators and Their Measurement Strategies. Geneva: World Health Organization, 2010.
Health information systems	Country web site for health statistics, with latest report and data available to the general public	3.1. Health information system governance and management	3.1.1. National Health Information system	3.1.1.1. National Health information system meets criteria, functional and responsive to health sector needs	World Health Organization. Monitoring the Building Blocks of Health Systems: A Handbook of Indicators and Their Measurement Strategies. Geneva: World Health Organization, 2010.
Health information systems	Reporting of notifiable diseases makes use of modern communication technology, and reporting of statistics from district to national levels is web-based	3.1. Health information system governance and management	3.1.2. Surveillance	3.1.2.2. Surveillance	World Health Organization. Monitoring the Building Blocks of Health Systems: A Handbook of Indicators and Their Measurement Strategies. Geneva: World Health Organization, 2010.
Health information systems	At least 90% of districts submit timely, complete, accurate reports to national level. Indicator: percentage of districts that submit timely, complete, accurate reports to national level	3.1. Health information system governance and management	3.1.2. Data Quality	3.1.2.1. Data quality is consistently monitored through a national mechanism that ensurs accuracy, reliability, and consistency of reported health data.	World Health Organization. Monitoring the Building Blocks of Health Systems: A Handbook of Indicators and Their Measurement Strategies. Geneva: World Health Organization, 2010.
Health information systems	Data quality assessments carried out and published within the past three years, using internationally agreed quality criteria such as the Data Quality Assessment Framework (DQAF)	3.1. Health information system governance and management	3.1.2. Data Quality	3.1.2.1. Data quality is consistently monitored through a national mechanism that ensurs accuracy, reliability, and consistency of reported health data.	World Health Organization. Monitoring the Building Blocks of Health Systems: A Handbook of Indicators and Their Measurement Strategies. Geneva: World Health Organization, 2010.
Health information systems	International Health Regulations (IHR) implemented according to international standards	3.1. Health information system governance and management	3.1.1. National Health Information system	3.1.1.1. National Health information system meets criteria, functional and responsive to health sector needs	World Health Organization. Monitoring the Building Blocks of Health Systems: A Handbook of Indicators and Their Measurement Strategies. Geneva: World Health Organization, 2010.
Health information systems	At least one national health accounts exercise completed in the past five years	3.1. Health information system governance and management	3.1.1. National Health Information system	3.1.1.1. National Health information system meets criteria, functional and responsive to health sector needs	World Health Organization. Monitoring the Building Blocks of Health Systems: A Handbook of Indicators and Their Measurement Strategies. Geneva: World Health Organization, 2010.
Health information systems	National database with public and private sector health facilities and geocoding, available and updated within the past three years	3.2. Data Driven Decision Making	3.2.1 Data-Driven Decision Making	3.2.1.1.Data informs allocation of financial resources , multi-year planning and forecasting at the national and subnational levels	World Health Organization. Monitoring the Building Blocks of Health Systems: A Handbook of Indicators and Their Measurement Strategies. Geneva: World Health Organization, 2010.
Health information systems	National database with health workers by district and main cadres updated within the past two years	3.2. Data Driven Decision Making	3.2.1 Data-Driven Decision Making	3.2.2.1. Data informs allocation of health workforce, multi-year planning and forecasting at the national and subnational levels	World Health Organization. Monitoring the Building Blocks of Health Systems: A Handbook of Indicators and Their Measurement Strategies. Geneva: World Health Organization, 2010.
Health information systems	Annual data on availability of tracer medicines and commodities in public and private health facilities	3.2. Data Driven Decision Making	3.2.1 Data-Driven Decision Making	3.2.3.1. Data informs allocation of medical products,multi-year planning and forecasting at the national and subnational levels	World Health Organization. Monitoring the Building Blocks of Health Systems: A Handbook of Indicators and Their Measurement Strategies. Geneva: World Health Organization, 2010.
Health information systems	A designated and functioning institutional mechanism charged with analysis of health statistics, synthesis of data from different sources and validation of data from population-based and facility-based sources	3.1. Health information system governance and management	3.1.2. Data Quality	3.1.2.1. Data quality is consistently monitored through a national mechanism that ensurs accuracy, reliability, and consistency of reported health data.	World Health Organization. Monitoring the Building Blocks of Health Systems: A Handbook of Indicators and Their Measurement Strategies. Geneva: World Health Organization, 2010.
Health information systems	A national set of indicators with targets and annual reporting to inform annual health sector reviews and other planning cycles	3.1. Health information system governance and management	3.1.2. Data Quality	3.1.2.1. Data quality is consistently monitored through a national mechanism that ensurs accuracy, reliability, and consistency of reported health data.	World Health Organization. Monitoring the Building Blocks of Health Systems: A Handbook of Indicators and Their Measurement Strategies. Geneva: World Health Organization, 2010.
Health information systems	A national microdata archive for health surveys and census established and operational	3.1. Health information system governance and management	3.1.1. National Health Information system	3.1.1.1. National Health information system meets criteria, functional and responsive to health sector needs	World Health Organization. Monitoring the Building Blocks of Health Systems: A Handbook of Indicators and Their Measurement Strategies. Geneva: World Health Organization, 2010.
Health information systems	Survey data used to assess and adjust routine reports from health facility on vaccinations, with the results published within 12 months of the preceding year	3.1. Health information system governance and management	3.1.2. Data Quality	3.1.2.1. Data quality is consistently monitored through a national mechanism that ensurs accuracy, reliability, and consistency of reported health data.	World Health Organization. Monitoring the Building Blocks of Health Systems: A Handbook of Indicators and Their Measurement Strategies. Geneva: World Health Organization, 2010.
Health information systems	A burden of disease study conducted within the past five years, with a strong national contribution	3.1. Health information system governance and management	3.1.1. National Health Information system	3.1.1.1. National Health information system meets criteria, functional and responsive to health sector needs	World Health Organization. Monitoring the Building Blocks of Health Systems: A Handbook of Indicators and Their Measurement Strategies. Geneva: World Health Organization, 2010.
Health information systems	A health systems performance assessment carried out within the past five years, with a strong national contribution	3.1. Health information system governance and management	3.1.1. National Health Information system	3.1.1.1. National Health information system meets criteria, functional and responsive to health sector needs	World Health Organization. Monitoring the Building Blocks of Health Systems: A Handbook of Indicators and Their Measurement Strategies. Geneva: World Health Organization, 2010.
Health information systems	Availability of financial and/or physical resources to support HIS related items within MOH/central budget (ref-1)	3.1. Health information system governance and management	3.1.1. National Health Information system	3.1.1.1. National Health information system meets criteria, functional and responsive to health sector needs	United States Agency for International Development (USAID). (2017). The Health Systems Assessment Approach: A how-to manual. Version 3.0.
Health information systems	Availability at each level of a sufficient number of qualified and competent HIS personnel (ref-2)	3.1. Health information system governance and management	3.1.1. National Health Information system	3.1.1.1. National Health information system meets criteria, functional and responsive to health sector needs	United States Agency for International Development (USAID). (2017). The Health Systems Assessment Approach: A how-to manual. Version 3.0.
Health information systems	Evidence of HIS workforce development mechanisms (ref-3)	3.1. Health information system governance and management	3.1.1. National Health Information system	3.1.1.1. National Health information system meets criteria, functional and responsive to health sector needs	United States Agency for International Development (USAID). (2017). The Health Systems Assessment Approach: A how-to manual. Version 3.0.
Health information systems	Existence of a National HIS strategic/comprehensive 5-year plan, costed, with clear roles and responsibilities, developed through a participatory process with engagement of key stakeholders (public, private, civil society, development partners, researchers), and widely accepted (ref-4)	3.1. Health information system governance and management	3.1.1. National Health Information system	3.1.1.1. National Health information system meets criteria, functional and responsive to health sector needs	United States Agency for International Development (USAID). (2017). The Health Systems Assessment Approach: A how-to manual. Version 3.0.
Health information systems	Clearly defined and functioning HIS management structures are in place. These include a regulatory authority, interagency coordinating body with the mandate and capacity to guide the implementation of the national HIS strategy, management bodies for ICT infrastructure and support, financial and human resources, and an oversight body (ref-5)	3.1. Health information system governance and management	3.1.1. National Health Information system	3.1.1.1. National Health information system meets criteria, functional and responsive to health sector needs	United States Agency for International Development (USAID). (2017). The Health Systems Assessment Approach: A how-to manual. Version 3.0.
Health information systems	Existence and application of policies, laws, and regulations mandating public and private health facilities/ providers to report indicators determined by the national HIS (ref-6)	3.1. Health information system governance and management	3.1.1. National Health Information system	3.1.1.1. National Health information system meets criteria, functional and responsive to health sector needs	United States Agency for International Development (USAID). (2017). The Health Systems Assessment Approach: A how-to manual. Version 3.0.
Health information systems	Presence and use of mechanisms to review and agree on a core and standardized set of HIS indicators (ref-7)	3.1. Health information system governance and management	3.1.3. Core Health Indicators	3.1.3.1. The country has core health indicators that are regularly updated and used to assess system resilience and performance at national and subnational Levels	United States Agency for International Development (USAID). (2017). The Health Systems Assessment Approach: A how-to manual. Version 3.0.
Health information systems	Availability and use of minimum core indicators at national and subnational levels, including the community level (ref-8)	3.1. Health information system governance and management	3.1.3. Core Health Indicators	3.1.3.1. The country has core health indicators that are regularly updated and used to assess system resilience and performance at national and subnational Levels	United States Agency for International Development (USAID). (2017). The Health Systems Assessment Approach: A how-to manual. Version 3.0.
Health information systems	Birth registration and death registration coverages (ref-9)	3.1. Health information system governance and management	3.1.1. National Health Information system	3.1.1.1. National Health information system meets criteria, functional and responsive to health sector needs	United States Agency for International Development (USAID). (2017). The Health Systems Assessment Approach: A how-to manual. Version 3.0.
Health information systems	There is an overall framework/strategy for the implementation of ICT for HIS (ref-10)	3.1. Health information system governance and management	3.1.1. National Health Information system	3.1.1.1. National Health information system meets criteria, functional and responsive to health sector needs	United States Agency for International Development (USAID). (2017). The Health Systems Assessment Approach: A how-to manual. Version 3.0.
Health information systems	Availability and accessibility of data sources (ref-11)	3.1. Health information system governance and management	3.1.2. Data Quality	3.1.2.1. Data quality is consistently monitored through a national mechanism that ensurs accuracy, reliability, and consistency of reported health data.	United States Agency for International Development (USAID). (2017). The Health Systems Assessment Approach: A how-to manual. Version 3.0.
Health information systems	Availability of a Master Facility List (MFL) with unique identifiers and including the private-sector and parastatal health facilities (ref-12)	3.1. Health information system governance and management	3.1.2. Data Quality	3.1.2.1. Data quality is consistently monitored through a national mechanism that ensurs accuracy, reliability, and consistency of reported health data.	United States Agency for International Development (USAID). (2017). The Health Systems Assessment Approach: A how-to manual. Version 3.0.
Health information systems	Percentage of districts represented in reported information (ref-13)	3.1. Health information system governance and management	3.1.2. Data Quality	3.1.2.1. Data quality is consistently monitored through a national mechanism that ensurs accuracy, reliability, and consistency of reported health data.	United States Agency for International Development (USAID). (2017). The Health Systems Assessment Approach: A how-to manual. Version 3.0.
Health information systems	Percentage of reported data that comes from private health facilities (ref-14)	3.1. Health information system governance and management	3.1.1. National Health Information system	3.1.1.1. National Health information system meets criteria, functional and responsive to health sector needs	United States Agency for International Development (USAID). (2017). The Health Systems Assessment Approach: A how-to manual. Version 3.0.
Health information systems	Availability and use of clear standards and guidelines for: (1) data collection,(2) reporting procedures methods, and (3)data analysis to be performed (ref-15)	3.1. Health information system governance and management	3.1.2. Data Quality	3.1.2.1. Data quality is consistently monitored through a national mechanism that ensurs accuracy, reliability, and consistency of reported health data.	United States Agency for International Development (USAID). (2017). The Health Systems Assessment Approach: A how-to manual. Version 3.0.
Health information systems	Data burden on health staff (measures as the number of reports a typical health facility submits monthly, quarterly, or annually) (ref-16)	3.2. Data Driven Decision Making	3.2.1 Data-Driven Decision Making	3.2.2.1. Data informs allocation of health workforce, multi-year planning and forecasting at the national and subnational levels	United States Agency for International Development (USAID). (2017). The Health Systems Assessment Approach: A how-to manual. Version 3.0.
Health information systems	Presence of institutionalized regular procedures to verify the quality of reported data accuracy, completeness, timeliness) (ref-17)	3.1. Health information system governance and management	3.1.2. Data Quality	3.1.2.1. Data quality is consistently monitored through a national mechanism that ensurs accuracy, reliability, and consistency of reported health data.	United States Agency for International Development (USAID). (2017). The Health Systems Assessment Approach: A how-to manual. Version 3.0.
Health information systems	Availability of a national summary report (i.e., annual health statistics report) that contains HIS information, analysis, and interpretation (most recent year) (ref-18)	3.1. Health information system governance and management	3.1.1. National Health Information system	3.1.1.1. National Health information system meets criteria, functional and responsive to health sector needs	United States Agency for International Development (USAID). (2017). The Health Systems Assessment Approach: A how-to manual. Version 3.0.
Health information systems	Data derived from different health programs/ subsectors are grouped together for reporting purposes (or even integrated in a single document),and documents widely available and used (ref-19)	3.1. Health information system governance and management	3.1.2. Data Quality	3.1.2.1. Data quality is consistently monitored through a national mechanism that ensurs accuracy, reliability, and consistency of reported health data.	United States Agency for International Development (USAID). (2017). The Health Systems Assessment Approach: A how-to manual. Version 3.0.
Health information systems	Availability of appropriate and accurate denominators (such as population by age group, by facility catchment area, by sex, by number of pregnant women) for analysis (ref-20)	3.1. Health information system governance and management	3.1.2. Data Quality	3.1.2.1. Data quality is consistently monitored through a national mechanism that ensurs accuracy, reliability, and consistency of reported health data.	United States Agency for International Development (USAID). (2017). The Health Systems Assessment Approach: A how-to manual. Version 3.0.
Health information systems	Availability of the results of timely data analysis, as defined by stakeholders and users (ref-21)	3.1. Health information system governance and management	3.1.2. Data Quality	3.1.2.1. Data quality is consistently monitored through a national mechanism that ensurs accuracy, reliability, and consistency of reported health data.	United States Agency for International Development (USAID). (2017). The Health Systems Assessment Approach: A how-to manual. Version 3.0.
Health information systems	Timeliness of reporting specified indicators (ref-22)	3.1. Health information system governance and management	3.1.2. Data Quality	3.1.2.1. Data quality is consistently monitored through a national mechanism that ensurs accuracy, reliability, and consistency of reported health data.	United States Agency for International Development (USAID). (2017). The Health Systems Assessment Approach: A how-to manual. Version 3.0.
Health information systems	Completeness of disease surveillance reporting, (percent) and use of data (ref-23)	3.1. Health information system governance and management	3.1.2. Data Quality	3.1.2.1. Data quality is consistently monitored through a national mechanism that ensurs accuracy, reliability, and consistency of reported health data.	United States Agency for International Development (USAID). (2017). The Health Systems Assessment Approach: A how-to manual. Version 3.0.
Health information systems	Use of data for planning, budgeting, or advocacy activities in the past year (ref-24)	3.2. Data Driven Decision Making	3.2.1 Data-Driven Decision Making	3.2.1.1.Data informs allocation of financial resources , multi-year planning and forecasting at the national and subnational levels	United States Agency for International Development (USAID). (2017). The Health Systems Assessment Approach: A how-to manual. Version 3.0.
Health information systems	Data or results of analyses are used at every level of the health system to inform them of program/ health system’s performance (ref-25)	3.2. Data Driven Decision Making	3.2.1 Data-Driven Decision Making	3.2.1.1.Data informs allocation of financial resources , multi-year planning and forecasting at the national and subnational levels	United States Agency for International Development (USAID). (2017). The Health Systems Assessment Approach: A how-to manual. Version 3.0.
Health information systems	Event management (i.e., verification, investigation, Analysis, and dissemination of information) (ref-C5.2)	3.1. Health information system governance and management	3.1.2. Surveillance	3.1.2.2. Surveillance	International Health Regulations (2005): States Parties Self-assessment annual reporting tool, second edition.
Health information systems	National guidelines and/or SOPs for surveillance have been developed and implemented at national, intermediate and local levels (ref-C5.1)	3.1. Health information system governance and management	3.1.2. Surveillance	3.1.2.2. Surveillance	International Health Regulations (2005): States Parties Self-assessment annual reporting tool, second edition.
Health information systems	whether a government is committed to collecting relevant health data for decision-making (ref-4.4.4.1)	3.1. Health information system governance and management	3.1.1. National Health Information system	3.1.1.1. National Health information system meets criteria, functional and responsive to health sector needs	Health system performance assessment: a framework for policy analysis Irene Papanicolas, Dheepa Rajan, Marina Karanikolos, Agnes Soucat, Josep Figueras
Health information systems	whether decisions are largely data-driven and evidence-based.	3.2. Data Driven Decision Making	3.2.1 Data-Driven Decision Making	3.2.1.1.Data informs allocation of financial resources , multi-year planning and forecasting at the national and subnational levels	Health system performance assessment: a framework for policy analysis Irene Papanicolas, Dheepa Rajan, Marina Karanikolos, Agnes Soucat, Josep Figueras
Health information systems	National health policy, strategy, plan (or health laws and regulations) clearly mentions indicators allowing for regular monitoring and evaluation (WHO Global Program of work) (ref-4.4.4.2)	3.1. Health information system governance and management	3.1.1. National Health Information system	3.1.1.1. National Health information system meets criteria, functional and responsive to health sector needs	Health system performance assessment: a framework for policy analysis Irene Papanicolas, Dheepa Rajan, Marina Karanikolos, Agnes Soucat, Josep Figueras
Health information systems	Percentage of health facilities providing complete reports according to district and/or national requirements (ref-18)	3.1. Health information system governance and management	3.1.2. Data Quality	3.1.2.1. Data quality is consistently monitored through a national mechanism that ensurs accuracy, reliability, and consistency of reported health data.	Health system resilience indicators: an integrated package for measuring and monitoring health system resilience in countries
Health information systems	Health system resilience is measured and monitored as part of routine health information system (ref-19)	3.1. Health information system governance and management	3.1.1. National Health Information system	3.1.1.1. National Health information system meets criteria, functional and responsive to health sector needs	Health system resilience indicators: an integrated package for measuring and monitoring health system resilience in countries
Health information systems	Comprehensive public health surveillance and response system in place at all service delivery levels (not feasible) (ref-17)	3.1. Health information system governance and management	3.1.2. Surveillance	3.1.2.2. Surveillance	Health system resilience indicators: an integrated package for measuring and monitoring health system resilience in countries
Health information systems	Percentage of facilities that have documented up to date risk profiles for potential shocks and stressors (changed to states level) (ref-20)	3.2. Data Driven Decision Making	3.2.1 Data-Driven Decision Making	3.2.1.1.Data informs allocation of financial resources , multi-year planning and forecasting at the national and subnational levels	Health system resilience indicators: an integrated package for measuring and monitoring health system resilience in countries
Health information systems	Existence of a mechanism for sharing of relevant public health information with other sectors (not useful)(ref-22)	3.2. Data Driven Decision Making	3.2.1 Data-Driven Decision Making	3.2.1.1.Data informs allocation of financial resources , multi-year planning and forecasting at the national and subnational levels	Health system resilience indicators: an integrated package for measuring and monitoring health system resilience in countries
Health information systems	Vulnerability and risk analysis and mapping has been conducted at the subnational level (ref-23)	3.2. Data Driven Decision Making	3.2.1 Data-Driven Decision Making	3.2.1.1.Data informs allocation of financial resources , multi-year planning and forecasting at the national and subnational levels	Health system resilience indicators: an integrated package for measuring and monitoring health system resilience in countries
Health information systems	Current state of essential public health functions delivery ascertained (ref-15)	3.1. Health information system governance and management	3.1.1. National Health Information system	3.1.1.1. National Health information system meets criteria, functional and responsive to health sector needs	Health system resilience indicators: an integrated package for measuring and monitoring health system resilience in countries
Health information systems	Mechanism in place to assess community trust (ref-16)	3.1. Health information system governance and management	3.1.1. National Health Information system	3.1.1.1. National Health information system meets criteria, functional and responsive to health sector needs	Health system resilience indicators: an integrated package for measuring and monitoring health system resilience in countries
Health information systems	Early-warning, alert and response system (EWARS) is established (IHR C5.1 Early warning surveillance function) (ref-21)	3.1. Health information system governance and management	3.1.2. Surveillance	3.1.2.2. Surveillance	Health system resilience indicators: an integrated package for measuring and monitoring health system resilience in countries
Health workforce	Number of health workers per 10,000 population (stock of health workers)	2.3. Heath workforce management	2.3.2. Distribution of Health Workforce	2.3.2.1. Equitable distribution of the health workforce based on needs (urban/rural, population density, health status, health risks).	World Health Organization. Monitoring the Building Blocks of Health Systems: A Handbook of Indicators and Their Measurement Strategies. Geneva: World Health Organization, 2010.
Health workforce	Annual number of graduates of health professions educational institutions per 100,000 population – by level and field of education	2.2. Health Workforce Production	2.2.1. Quantity of Health Workforce Production	2.2.1.1.Health workforce production meets needs and addresses skill mix imbalances.	World Health Organization. Monitoring the Building Blocks of Health Systems: A Handbook of Indicators and Their Measurement Strategies. Geneva: World Health Organization, 2010.
Health workforce	Number of senior staff at primary health-care facilities who received in-service management training (with nationally approved curriculum) in the past 12 months (ref_Recommended core indicator 3)	2.3. Heath workforce management	2.3.3. In-service Training	2.3.3.1. There is accredited in-service and continuing education programs that address learner needs and enhance service provision.	World Health Organization. Monitoring the Building Blocks of Health Systems: A Handbook of Indicators and Their Measurement Strategies. Geneva: World Health Organization, 2010.
Health workforce	Private provider registration system is up to date and accurate (ref_ Core indicator 2)	2.1. Health workforce planning	2.1.1. Health Workforce Strategy and Data	2.1.1.2. A fully functional and up-to-date health workforce information system is in place.	World Health Organization. Monitoring the Building Blocks of Health Systems: A Handbook of Indicators and Their Measurement Strategies. Geneva: World Health Organization, 2010.
Health workforce	Distribution of health workers – by occupation/specialization, region, place of work and sex (public private) (production and management)	2.3. Heath workforce management	2.3.2. Distribution of Health Workforce	2.3.2.1. Equitable distribution of the health workforce based on needs (urban/rural, population density, health status, health risks).	World Health Organization. Monitoring the Building Blocks of Health Systems: A Handbook of Indicators and Their Measurement Strategies. Geneva: World Health Organization, 2010.
Health workforce	Number of entrants into community health training programmes (with nationally approved curriculum) in the past 12 months, e.g. by sex (ref_Core indicator 1)	2.2. Health Workforce Production	2.2.1. Quantity of Health Workforce Production	2.2.1.1.Health workforce production meets needs and addresses skill mix imbalances.	World Health Organization. Monitoring the Building Blocks of Health Systems: A Handbook of Indicators and Their Measurement Strategies. Geneva: World Health Organization, 2010.
Health workforce	Number of students in medical, nursing and midwifery (pre-service) education programmes per qualified instructor (ref_Core indicator 1)	2.2. Health Workforce Production	2.2.1. Quantity of Health Workforce Production	2.2.1.1.Health workforce production meets needs and addresses skill mix imbalances.	World Health Organization. Monitoring the Building Blocks of Health Systems: A Handbook of Indicators and Their Measurement Strategies. Geneva: World Health Organization, 2010.
Health workforce	Number of health workers trained abroad newly entering into the country in the past 12 months, e.g. relative to the number of nationally trained graduates (Recommended core indicator 3)	2.2. Health Workforce Production	2.2.1. Quantity of Health Workforce Production	2.2.1.1.Health workforce production meets needs and addresses skill mix imbalances.	World Health Organization. Monitoring the Building Blocks of Health Systems: A Handbook of Indicators and Their Measurement Strategies. Geneva: World Health Organization, 2010.
Health workforce	Number of days of health worker absenteeism relative to the total number of scheduled working days over a given period among staff at primary health-care facilities.(ref_Recommended core indicator 3)	2.3. Heath workforce management	2.3.4. Managing Health Workforce Absenteeism	2.3.4.1. A system in place to manage health workforce absences in the public sector , address causes, and regulate dual practice	World Health Organization. Monitoring the Building Blocks of Health Systems: A Handbook of Indicators and Their Measurement Strategies. Geneva: World Health Organization, 2010.
Health workforce	Percentage of health service providers at primary health-care facilities who received personal supervision in the past six months (ref_Recommended core indicator 3)	2.3. Heath workforce management	2.3.3. In-service Training	2.3.3.1. There is accredited in-service and continuing education programs that address learner needs and enhance service provision.	World Health Organization. Monitoring the Building Blocks of Health Systems: A Handbook of Indicators and Their Measurement Strategies. Geneva: World Health Organization, 2010.
Health workforce	Number of health workers newly recruited at primary health-care facilities in the past 12 months, e.g. expressed as percentage of planned recruitment target (ref_ Core indicator 2)	2.2. Health Workforce Production	2.2.1. Quantity of Health Workforce Production	2.2.1.1.Health workforce production meets needs and addresses skill mix imbalances.	World Health Organization. Monitoring the Building Blocks of Health Systems: A Handbook of Indicators and Their Measurement Strategies. Geneva: World Health Organization, 2010.
Health workforce	Costed, prioritized human resources management/development plan exists (ref_Core indicator 1)	2.1. Health workforce planning	2.1.1. Health Workforce Strategy and Data	2.1.1.1.Evidence-based national health workforce plan exists, meets criteria, regularly updated and a mechanism for regular workforce planning and review is in place.	World Health Organization. Monitoring the Building Blocks of Health Systems: A Handbook of Indicators and Their Measurement Strategies. Geneva: World Health Organization, 2010.
Health workforce	Number of national data points on the stock and distribution of health workers produced within the last three years (ref_Core indicator 1)	2.1. Health workforce planning	2.1.1. Health Workforce Strategy and Data	2.1.1.2. A fully functional and up-to-date health workforce information system is in place.	World Health Organization. Monitoring the Building Blocks of Health Systems: A Handbook of Indicators and Their Measurement Strategies. Geneva: World Health Organization, 2010.
Health workforce	Production of new health care workers as compared to staff vacancies(ref_4)	2.2. Health Workforce Production	2.2.1. Quantity of Health Workforce Production	2.2.1.1.Health workforce production meets needs and addresses skill mix imbalances.	United States Agency for International Development (USAID). (2017). The Health Systems Assessment Approach: A how-to manual. Version 3.0.
Health workforce	Ratios of PSE applicants, admissions, and graduations (ref_5)	2.2. Health Workforce Production	2.2.1. Quantity of Health Workforce Production	2.2.1.1.Health workforce production meets needs and addresses skill mix imbalances.	United States Agency for International Development (USAID). (2017). The Health Systems Assessment Approach: A how-to manual. Version 3.0.
Health workforce	Ratio of rural versus urban admissions and graduates (ref_6)	2.2. Health Workforce Production	2.2.1. Quantity of Health Workforce Production	2.2.1.1.Health workforce production meets needs and addresses skill mix imbalances.	United States Agency for International Development (USAID). (2017). The Health Systems Assessment Approach: A how-to manual. Version 3.0.
Health workforce	Funding sources for PSE (production) (ref_7)	2.2. Health Workforce Production	2.2.1. Quantity of Health Workforce Production	2.2.1.1.Health workforce production meets needs and addresses skill mix imbalances.	United States Agency for International Development (USAID). (2017). The Health Systems Assessment Approach: A how-to manual. Version 3.0.
Health workforce	Number and sources of inputs to the HRH labor market (in labor market under production) (ref_8)	2.2. Health Workforce Production	2.2.1. Quantity of Health Workforce Production	2.2.1.1.Health workforce production meets needs and addresses skill mix imbalances.	United States Agency for International Development (USAID). (2017). The Health Systems Assessment Approach: A how-to manual. Version 3.0.
Health workforce	Working conditions by public and private sectors (ref_11)	2.3. Heath workforce management	2.3.1. Heath sector wages and benefits compared to other government sectors	2.3.1.1. The PayScale and non-wage benefits is competitive and attract and retain qualified health workers	United States Agency for International Development (USAID). (2017). The Health Systems Assessment Approach: A how-to manual. Version 3.0.
Health workforce	Spending and remuneration (ref_12) Percent of HRH spending compared to health spending and overall civil service spending	2.3. Heath workforce management	2.3.1. Heath sector wages and benefits compared to other government sectors	2.3.1.1. The PayScale and non-wage benefits is competitive and attract and retain qualified health workers	United States Agency for International Development (USAID). (2017). The Health Systems Assessment Approach: A how-to manual. Version 3.0.
Health workforce	Number and sources of exits from the HRH labor market (in labor market under management) (ref_9)	2.3. Heath workforce management	2.3.2. Distribution of Health Workforce	2.3.2.1. Equitable distribution of the health workforce based on needs (urban/rural, population density, health status, health risks).	United States Agency for International Development (USAID). (2017). The Health Systems Assessment Approach: A how-to manual. Version 3.0.
Health workforce	Unemployment by cadre (ref_10)	2.3. Heath workforce management	2.3.2. Distribution of Health Workforce	2.3.2.1. Equitable distribution of the health workforce based on needs (urban/rural, population density, health status, health risks).	United States Agency for International Development (USAID). (2017). The Health Systems Assessment Approach: A how-to manual. Version 3.0.
Health workforce	Existence of a comprehensive HRH plan with a budget (ref_13)	2.1. Health workforce planning	2.1.1. Health Workforce Strategy and Data	2.1.1.1.Evidence-based national health workforce plan exists, meets criteria, regularly updated and a mechanism for regular workforce planning and review is in place.	United States Agency for International Development (USAID). (2017). The Health Systems Assessment Approach: A how-to manual. Version 3.0.
Health workforce	Maturity of the HRIS (ref_14)	2.1. Health workforce planning	2.1.1. Health Workforce Strategy and Data	2.1.1.2. A fully functional and up-to-date health workforce information system is in place.	United States Agency for International Development (USAID). (2017). The Health Systems Assessment Approach: A how-to manual. Version 3.0.
Health workforce	Accessibility of the health workforce (ref_15)	2.3. Heath workforce management	2.3.2. Distribution of Health Workforce	2.3.2.1. Equitable distribution of the health workforce based on needs (urban/rural, population density, health status, health risks).	United States Agency for International Development (USAID). (2017). The Health Systems Assessment Approach: A how-to manual. Version 3.0.
Health workforce	Trends for the past five years (ref_3)	2.2. Health Workforce Production	2.2.1. Quantity of Health Workforce Production	2.2.1.1.Health workforce production meets needs and addresses skill mix imbalances.	United States Agency for International Development (USAID). (2017). The Health Systems Assessment Approach: A how-to manual. Version 3.0.
Health workforce	Enabling environment for good performance (ref_17)	2.3. Heath workforce management	2.3.1. Heath sector wages and benefits compared to other government sectors	2.3.1.1. The PayScale and non-wage benefits is competitive and attract and retain qualified health workers	United States Agency for International Development (USAID). (2017). The Health Systems Assessment Approach: A how-to manual. Version 3.0.
Health workforce	Productivity of the workforce (ref_16)	2.3. Heath workforce management	2.3.1. Heath sector wages and benefits compared to other government sectors	2.3.1.1. The PayScale and non-wage benefits is competitive and attract and retain qualified health workers	United States Agency for International Development (USAID). (2017). The Health Systems Assessment Approach: A how-to manual. Version 3.0.
Health workforce	Existence of and use of up- to-date HRH policies (ref_18)	2.1. Health workforce planning	2.1.1. Health Workforce Strategy and Data	2.1.1.1.Evidence-based national health workforce plan exists, meets criteria, regularly updated and a mechanism for regular workforce planning and review is in place.	United States Agency for International Development (USAID). (2017). The Health Systems Assessment Approach: A how-to manual. Version 3.0.
Health workforce	Existence of clear and up-to-date scopes of practice/staffing norms (ref_19)	2.3. Heath workforce management	2.3.3. In-service Training	2.3.3.1. There is accredited in-service and continuing education programs that address learner needs and enhance service provision.	United States Agency for International Development (USAID). (2017). The Health Systems Assessment Approach: A how-to manual. Version 3.0.
Health workforce	Employment policies documented and used (ref_20)	2.3. Heath workforce management	2.3.3. In-service Training	2.3.3.1. There is accredited in-service and continuing education programs that address learner needs and enhance service provision.	United States Agency for International Development (USAID). (2017). The Health Systems Assessment Approach: A how-to manual. Version 3.0.
Health workforce	Existence of mechanisms and models for health workforce planning (Yes/No/Partly) (ref_5.4.4.2)	2.1. Health workforce planning	2.1.1. Health Workforce Strategy and Data	2.1.1.1.Evidence-based national health workforce plan exists, meets criteria, regularly updated and a mechanism for regular workforce planning and review is in place.	Health system performance assessment: a framework for policy analysis Irene Papanicolas, Dheepa Rajan, Marina Karanikolos, Agnes Soucat, Josep Figueras
Health workforce	Existence of national and/or sub-national mechanisms for accreditation of health workforce education and training institutions and their programmes (Yes/No/Partly) (ref_5.4.4.2)	2.2. Health Workforce Production	2.2.2. Quality of Health Workforce Production (accreditation and education)	2.2.2.1. A national accreditation body evaluates Pre-Service Training Institutions using a comprehensive, evidence-based approach and ensures adherence to quality standards	Health system performance assessment: a framework for policy analysis Irene Papanicolas, Dheepa Rajan, Marina Karanikolos, Agnes Soucat, Josep Figueras
Health workforce	Standard on the duration and content of health workforce education and training (ref_5.4.4.2)	2.2. Health Workforce Production	2.2.2. Quality of Health Workforce Production (accreditation and education)	2.2.2.1. A national accreditation body evaluates Pre-Service Training Institutions using a comprehensive, evidence-based approach and ensures adherence to quality standards	Health system performance assessment: a framework for policy analysis Irene Papanicolas, Dheepa Rajan, Marina Karanikolos, Agnes Soucat, Josep Figueras
Health workforce	Existence of advanced nursing roles (ref_5.4.1.2)	2.2. Health Workforce Production	2.2.2. Quality of Health Workforce Production (accreditation and education)	2.2.2.1. A national accreditation body evaluates Pre-Service Training Institutions using a comprehensive, evidence-based approach and ensures adherence to quality standards	Health system performance assessment: a framework for policy analysis Irene Papanicolas, Dheepa Rajan, Marina Karanikolos, Agnes Soucat, Josep Figueras
Health workforce	Specialist surgical workforce density per 100,000 population (ref_5.4.1.2)	2.3. Heath workforce management	2.3.2. Distribution of Health Workforce	2.3.2.1. Equitable distribution of the health workforce based on needs (urban/rural, population density, health status, health risks).	Health system performance assessment: a framework for policy analysis Irene Papanicolas, Dheepa Rajan, Marina Karanikolos, Agnes Soucat, Josep Figueras
Health workforce	Family medicine practitioners density per 100,000 population (ref_5.4.1.2)	2.3. Heath workforce management	2.3.2. Distribution of Health Workforce	2.3.2.1. Equitable distribution of the health workforce based on needs (urban/rural, population density, health status, health risks).	Health system performance assessment: a framework for policy analysis Irene Papanicolas, Dheepa Rajan, Marina Karanikolos, Agnes Soucat, Josep Figueras
Health workforce	Health worker distribution by age group (% active in a given age group)(ref_5.4.1.2)	2.3. Heath workforce management	2.3.2. Distribution of Health Workforce	2.3.2.1. Equitable distribution of the health workforce based on needs (urban/rural, population density, health status, health risks).	Health system performance assessment: a framework for policy analysis Irene Papanicolas, Dheepa Rajan, Marina Karanikolos, Agnes Soucat, Josep Figueras
Health workforce	Female health workforce (percentage of female in active workforce by occupation) (ref_5.4.1.2)	2.3. Heath workforce management	2.3.2. Distribution of Health Workforce	2.3.2.1. Equitable distribution of the health workforce based on needs (urban/rural, population density, health status, health risks).	Health system performance assessment: a framework for policy analysis Irene Papanicolas, Dheepa Rajan, Marina Karanikolos, Agnes Soucat, Josep Figueras
Health workforce	Existence of in-service training as an element of national education plans for the health workforce (ref_5.4.1.2)	2.3. Heath workforce management	2.3.3. In-service Training	2.3.3.1. There is accredited in-service and continuing education programs that address learner needs and enhance service provision.	Health system performance assessment: a framework for policy analysis Irene Papanicolas, Dheepa Rajan, Marina Karanikolos, Agnes Soucat, Josep Figueras
Health workforce	Existence of national systems for continuing professional development (ref_5.4.1.2)	2.3. Heath workforce management	2.3.3. In-service Training	2.3.3.1. There is accredited in-service and continuing education programs that address learner needs and enhance service provision.	Health system performance assessment: a framework for policy analysis Irene Papanicolas, Dheepa Rajan, Marina Karanikolos, Agnes Soucat, Josep Figueras
Health workforce	National IHR Focal Point is designated (ref_C2.1)	2.1. Health workforce planning	2.1.2. Surge Capacity	2.1.2.1 There is a functional, fully funded roster of rapid response teams for emergency response	International Health Regulations (2005): States Parties Self-assessment annual reporting tool, second edition.
Health workforce	C6.1. Human resources for implementation of IHR Human resources are available as required in all relevant sectors at the national, intermediate and local levels, to detect, assess, notify, report and respond to events according to IHR provisions	2.1. Health workforce planning	2.1.2. Surge Capacity	2.1.2.1 There is a functional, fully funded roster of rapid response teams for emergency response	International Health Regulations (2005): States Parties Self-assessment annual reporting tool, second edition.
Health workforce	C6.2. Workforce surge during a public health event .A national multisectoral workforce surge strategic plan in emergencies is implemented	2.1. Health workforce planning	2.1.2. Surge Capacity	2.1.2.1 There is a functional, fully funded roster of rapid response teams for emergency response	International Health Regulations (2005): States Parties Self-assessment annual reporting tool, second edition.
Health workforce	Functional, up to date (within the last 12 months) roster of a readily available multidisciplinary rapid response team for emergency response and surge capacity in place (ref_12)	2.1. Health workforce planning	2.1.2. Surge Capacity	2.1.2.1 There is a functional, fully funded roster of rapid response teams for emergency response	Health system resilience indicators: an integrated package for measuring and monitoring health system resilience in countries
Health workforce	Percentage of health workers at subnational (for example, district) and primary care levels trained in community engagement and risk communication (facility) (ref_10)	2.3. Heath workforce management	2.3.3. In-service Training	2.3.3.1. There is accredited in-service and continuing education programs that address learner needs and enhance service provision.	Health system resilience indicators: an integrated package for measuring and monitoring health system resilience in countries
Health workforce	Percentage of facilities with a designated team or focal person(s) for emergency management and service continuity (facility) (ref_11)	2.1. Health workforce planning	2.1.2. Surge Capacity	2.1.2.1 There is a functional, fully funded roster of rapid response teams for emergency response	Health system resilience indicators: an integrated package for measuring and monitoring health system resilience in countries
Health workforce	Percentage of facilities with personnel that have received training with a focus on building health system resilience (ref_14)	2.3. Heath workforce management	2.3.3. In-service Training	2.3.3.1. There is accredited in-service and continuing education programs that address learner needs and enhance service provision.	Health system resilience indicators: an integrated package for measuring and monitoring health system resilience in countries
Health workforce	Percentage of facilities with access to or being covered by dedicated services for occupational safety and health (ref_13)	2.3. Heath workforce management	2.3.1. Heath sector wages and benefits compared to other government sectors	2.3.1.1. The PayScale and non-wage benefits is competitive and attract and retain qualified health workers	Health system resilience indicators: an integrated package for measuring and monitoring health system resilience in countries
Health workforce	Existence of a health workforce unit in the Ministry of Health responsible for developing and monitoring policies and plans on health workforce (Yes/No/Partly) (ref_5.4.4.2)	2.1. Health workforce planning	2.1.2. Surge Capacity	2.1.2.1 There is a functional, fully funded roster of rapid response teams for emergency response	Health system performance assessment: a framework for policy analysis Irene Papanicolas, Dheepa Rajan, Marina Karanikolos, Agnes Soucat, Josep Figueras
Health workforce	Density of health workers per 10 000 population at national level, by occupation	2.3. Heath workforce management	2.3.2. Distribution of Health Workforce	2.3.2.1. Equitable distribution of the health workforce based on needs (urban/rural, population density, health status, health risks).	Health system performance assessment: a framework for policy analysis Irene Papanicolas, Dheepa Rajan, Marina Karanikolos, Agnes Soucat, Josep Figueras
Health workforce	Density of health workers per 10 000 population at sub-national level, by occupation	2.3. Heath workforce management	2.3.2. Distribution of Health Workforce	2.3.2.1. Equitable distribution of the health workforce based on needs (urban/rural, population density, health status, health risks).	Health system performance assessment: a framework for policy analysis Irene Papanicolas, Dheepa Rajan, Marina Karanikolos, Agnes Soucat, Josep Figueras
Health workforce	Density: Health worker density per 1000 population per cadre, by gender	2.3. Heath workforce management	2.3.2. Distribution of Health Workforce	2.3.2.1. Equitable distribution of the health workforce based on needs (urban/rural, population density, health status, health risks).	United States Agency for International Development (USAID). (2017). The Health Systems Assessment Approach: A how-to manual. Version 3.0.
Health workforce	Geographical distribution: health worker density per 1000 population per cadre, subnational districts (NHWA 01_02)	2.3. Heath workforce management	2.3.2. Distribution of Health Workforce	2.3.2.1. Equitable distribution of the health workforce based on needs (urban/rural, population density, health status, health risks).	United States Agency for International Development (USAID). (2017). The Health Systems Assessment Approach: A how-to manual. Version 3.0.
Health system financing	Total expenditure on health (ref _ Core indicator 1a)	5.1. Governance Revenue raising and Pooling	5.1.2. Revenue Raising	5.1.2.1 Reliable funding sources throughout the duration of the current planning cycle	World Health Organization. Monitoring the Building Blocks of Health Systems: A Handbook of Indicators and Their Measurement Strategies. Geneva: World Health Organization, 2010.
Health system financing	General government expenditure on health as a proportion of general government expenditure (GGHE/GGE). (ref_Core indicator 1b)	5.1. Governance Revenue raising and Pooling	5.1.2. Revenue Raising	5.1.2.1 Reliable funding sources throughout the duration of the current planning cycle	World Health Organization. Monitoring the Building Blocks of Health Systems: A Handbook of Indicators and Their Measurement Strategies. Geneva: World Health Organization, 2010.
Health system financing	Patient / household out-of-pocket expenditures of accessing or obtaining services collected intermittently (ref_ Core indicator 2a)	5.2. Purcahsing access and Financial Protection	5.2.2.Financial Protection	5.2.2.2. Out-of-pocket health expenditures are minimized, effective fee exemptions are in place, and informal fees are eliminated to promote equitable access to healthcare	World Health Organization. Monitoring the Building Blocks of Health Systems: A Handbook of Indicators and Their Measurement Strategies. Geneva: World Health Organization, 2010.
Health system financing	in countries with widespread health insurance :Number (%) of people/households covered by health insurance, by population group and specifically for poor/vulnerable groups. (ref_ core indicator 2b)	5.2. Purcahsing access and Financial Protection	5.2.2.Financial Protection	5.2.2.1. Population covered by health insurance that ensures access to essential health services without financial hardship	World Health Organization. Monitoring the Building Blocks of Health Systems: A Handbook of Indicators and Their Measurement Strategies. Geneva: World Health Organization, 2010.
Health system financing	Information on government expenditures on wages and salaries readily available. (ref_ core indicator 3a)Government expenditure on wages and salaries as %GGHE (ref_Optional indicator 3)	5.3. Capacity of Public Institutions	5.3.3. Systematic tracking of Health Spending	5.3.3.1. Timely, accurate, and comprehensive data on resource flows and health expenditures	World Health Organization. Monitoring the Building Blocks of Health Systems: A Handbook of Indicators and Their Measurement Strategies. Geneva: World Health Organization, 2010.
Health system financing	Availability of data on government expenditure on priority problems, by level of government. (ref_core indicator 3b)	5.3. Capacity of Public Institutions	5.3.3. Systematic tracking of Health Spending	5.3.3.1. Timely, accurate, and comprehensive data on resource flows and health expenditures	World Health Organization. Monitoring the Building Blocks of Health Systems: A Handbook of Indicators and Their Measurement Strategies. Geneva: World Health Organization, 2010.
Health system financing	Number and % of facilities meeting established national financial management criteria. (ref_4)	5.3. Capacity of Public Institutions	5.3.3. Systematic tracking of Health Spending	5.3.3.1. Timely, accurate, and comprehensive data on resource flows and health expenditures	World Health Organization. Monitoring the Building Blocks of Health Systems: A Handbook of Indicators and Their Measurement Strategies. Geneva: World Health Organization, 2010.
Health system financing	THE as percentage of GDP (ref_1)	5.1. Governance Revenue raising and Pooling	5.1.2. Revenue Raising	5.1.2.1 Reliable funding sources throughout the duration of the current planning cycle	United States Agency for International Development (USAID). (2017). The Health Systems Assessment Approach: A how-to manual. Version 3.0.
Health system financing	GGHE as percentage of total government Expenditure (ref_3)	5.1. Governance Revenue raising and Pooling	5.1.2. Revenue Raising	5.1.2.1 Reliable funding sources throughout the duration of the current planning cycle	United States Agency for International Development (USAID). (2017). The Health Systems Assessment Approach: A how-to manual. Version 3.0.
Health system financing	GGHE as a percentage of THE (proxy for equity) (ref_4)	5.1. Governance Revenue raising and Pooling	5.1.2. Revenue Raising	5.1.2.1 Reliable funding sources throughout the duration of the current planning cycle	United States Agency for International Development (USAID). (2017). The Health Systems Assessment Approach: A how-to manual. Version 3.0.
Health system financing	External resources for health as a percentage of THE (proxy for dependency) (ref_5)	5.1. Governance Revenue raising and Pooling	5.1.2. Revenue Raising	5.1.2.1 Reliable funding sources throughout the duration of the current planning cycle	United States Agency for International Development (USAID). (2017). The Health Systems Assessment Approach: A how-to manual. Version 3.0.
Health system financing	Proportion of population enrolled in insurance or entitled to coverage under a Financial protection mechanism (ref_8)	5.2. Purcahsing access and Financial Protection	5.2.2.Financial Protection	5.2.2.1. Population covered by health insurance that ensures access to essential health services without financial hardship	United States Agency for International Development (USAID). (2017). The Health Systems Assessment Approach: A how-to manual. Version 3.0.
Health system financing	Fragmentation and sustainability of financial protection mechanisms (ref_9)	5.1. Governance Revenue raising and Pooling	5.1.1. Health financing policy and decision making	5.1.1.1. Health financing policies are guided by UHC goals and high-quality health financing data are systematically used to inform decision making	United States Agency for International Development (USAID). (2017). The Health Systems Assessment Approach: A how-to manual. Version 3.0.
Health system financing	Out-of-pocket spending— user fees and exemption policies (ref_10)	5.2. Purcahsing access and Financial Protection	5.2.2.Financial Protection	5.2.2.2. Out-of-pocket health expenditures are minimized, effective fee exemptions are in place, and informal fees are eliminated to promote equitable access to healthcare	United States Agency for International Development (USAID). (2017). The Health Systems Assessment Approach: A how-to manual. Version 3.0.
Health system financing	Out-of-pocket spending—informal payments in the public sector (ref_11)	5.2. Purcahsing access and Financial Protection	5.2.2.Financial Protection	5.2.2.2. Out-of-pocket health expenditures are minimized, effective fee exemptions are in place, and informal fees are eliminated to promote equitable access to healthcare	United States Agency for International Development (USAID). (2017). The Health Systems Assessment Approach: A how-to manual. Version 3.0.
Health system financing	Trends in government health resource allocations (ref_13)	5.1. Governance Revenue raising and Pooling	5.1.1. Health financing policy and decision making	5.1.1.1. Health financing policies are guided by UHC goals and high-quality health financing data are systematically used to inform decision making	United States Agency for International Development (USAID). (2017). The Health Systems Assessment Approach: A how-to manual. Version 3.0.
Health system financing	Per capita THE at international dollar rate (ref_2)	5.1. Governance Revenue raising and Pooling	5.1.1. Health financing policy and decision making	5.1.1.1. Health financing policies are guided by UHC goals and high-quality health financing data are systematically used to inform decision making	United States Agency for International Development (USAID). (2017). The Health Systems Assessment Approach: A how-to manual. Version 3.0.
Health system financing	Out-of-pocket expenditure as a Percentage of THE (ref_6)	5.2. Purcahsing access and Financial Protection	5.2.2.Financial Protection	5.2.2.2. Out-of-pocket health expenditures are minimized, effective fee exemptions are in place, and informal fees are eliminated to promote equitable access to healthcare	United States Agency for International Development (USAID). (2017). The Health Systems Assessment Approach: A how-to manual. Version 3.0.
Health system financing	Incidence of Catastrophic and Impoverishing Expenditures (ref_7)	5.2. Purcahsing access and Financial Protection	5.2.2.Financial Protection	5.2.2.2. Out-of-pocket health expenditures are minimized, effective fee exemptions are in place, and informal fees are eliminated to promote equitable access to healthcare	United States Agency for International Development (USAID). (2017). The Health Systems Assessment Approach: A how-to manual. Version 3.0.
Health system financing	Services covered by health benefit plans. Service delivery (ref_14)	5.2. Purcahsing access and Financial Protection	5.2.1. Purchasing, providers payments and conditions of access	5.2.1.2. Entitlements to health benefits are explicitly defined, universal in nature, and ensures access to population in need	United States Agency for International Development (USAID). (2017). The Health Systems Assessment Approach: A how-to manual. Version 3.0.
Health system financing	Provider payment mechanisms (ref_15)	5.2. Purcahsing access and Financial Protection	5.2.1. Purchasing, providers payments and conditions of access	5.2.1.1. Resource allocation to providers reflects population health needs, provider performance and tailored in support of service delivery objectives.	United States Agency for International Development (USAID). (2017). The Health Systems Assessment Approach: A how-to manual. Version 3.0.
Health system financing	Contracting and performance-based Incentive mechanisms (ref_16)	5.2. Purcahsing access and Financial Protection	5.2.1. Purchasing, providers payments and conditions of access	5.2.1.1. Resource allocation to providers reflects population health needs, provider performance and tailored in support of service delivery objectives.	United States Agency for International Development (USAID). (2017). The Health Systems Assessment Approach: A how-to manual. Version 3.0.
Health system financing	Health financing institutional capacity (ref_17)	5.3. Capacity of Public Institutions	5.3.3. Systematic tracking of Health Spending	5.3.3.1. Timely, accurate, and comprehensive data on resource flows and health expenditures	United States Agency for International Development (USAID). (2017). The Health Systems Assessment Approach: A how-to manual. Version 3.0.
Health system financing	Local-level spending authority and Institutional capacity (ref_18)	5.3. Capacity of Public Institutions	5.3.3. Systematic tracking of Health Spending	5.3.3.1. Timely, accurate, and comprehensive data on resource flows and health expenditures	United States Agency for International Development (USAID). (2017). The Health Systems Assessment Approach: A how-to manual. Version 3.0.
Health system financing	Budget transfers for health in decentralized system Governance-capacity to implement decentralization (ref_19)	5.3. Capacity of Public Institutions	5.3.1. Public Financial Management (PFM) System	5.3.1.1. Health budget formulation enables flexible spending that aligns with sector priorities, and ensures that public funds are directed toward priority populations, essential interventions, and providers payments are structured to reward outputs and performance	United States Agency for International Development (USAID). (2017). The Health Systems Assessment Approach: A how-to manual. Version 3.0.
Health system financing	Budget execution (trends in planned and realized public health expenditures) (ref_20)	5.3. Capacity of Public Institutions	5.3.1. Public Financial Management (PFM) System	5.3.1.1. Health budget formulation enables flexible spending that aligns with sector priorities, and ensures that public funds are directed toward priority populations, essential interventions, and providers payments are structured to reward outputs and performance	United States Agency for International Development (USAID). (2017). The Health Systems Assessment Approach: A how-to manual. Version 3.0.
Health system financing	Prioritization and the process of government health budget formulation (ref_12)	5.3. Capacity of Public Institutions	5.3.1. Public Financial Management (PFM) System	5.3.1.1. Health budget formulation enables flexible spending that aligns with sector priorities, and ensures that public funds are directed toward priority populations, essential interventions, and providers payments are structured to reward outputs and performance	United States Agency for International Development (USAID). (2017). The Health Systems Assessment Approach: A how-to manual. Version 3.0.
Health system financing	Health financing arrangement includes public funding of public health services (ref_37)	5.1. Governance Revenue raising and Pooling	5.1.2. Revenue Raising	5.1.2.1 Reliable funding sources throughout the duration of the current planning cycle	Health system resilience indicators: an integrated package for measuring and monitoring health system resilience in countries
Health system financing	Percentage of health facilities with user fees waiver mechanisms for public health emergency-related health services (ref_31)	5.2. Purcahsing access and Financial Protection	5.2.2.Financial Protection	5.2.2.2. Out-of-pocket health expenditures are minimized, effective fee exemptions are in place, and informal fees are eliminated to promote equitable access to healthcare	Health system resilience indicators: an integrated package for measuring and monitoring health system resilience in countries
Health system financing	Mechanism in place to ensure financial barriers do not impede diagnosis and treatment to a range of health threats (ref_32)	5.2. Purcahsing access and Financial Protection	5.2.2.Financial Protection	5.2.2.2. Out-of-pocket health expenditures are minimized, effective fee exemptions are in place, and informal fees are eliminated to promote equitable access to healthcare	Health system resilience indicators: an integrated package for measuring and monitoring health system resilience in countries
Health system financing	Availability of dedicated budget line to support health services continuity in all contexts (ref_33)	5.3. Capacity of Public Institutions	5.3.2. Funding to respond to shocks and emergencies	5.3.2.1. Domestic financing for responding to emergencies is in place and allows for timely response	Health system resilience indicators: an integrated package for measuring and monitoring health system resilience in countries
Health system financing	Mapping of all health sector assets (resources) has been conducted in the last two years (ref_36)	5.1. Governance Revenue raising and Pooling	5.1.1. Health financing policy and decision making	5.1.1.1. Health financing policies are guided by UHC goals and high-quality health financing data are systematically used to inform decision making	Health system resilience indicators: an integrated package for measuring and monitoring health system resilience in countries
Health system financing	Contingency funds available in the country for emergencies (ref_34)	5.3. Capacity of Public Institutions	5.3.2. Funding to respond to shocks and emergencies	5.3.2.1. Domestic financing for responding to emergencies is in place and allows for timely response	Health system resilience indicators: an integrated package for measuring and monitoring health system resilience in countries
Health system financing	Contingency or service continuity funds are accessible to the facility (ref_35)	5.3. Capacity of Public Institutions	5.3.2. Funding to respond to shocks and emergencies	5.3.2.1. Domestic financing for responding to emergencies is in place and allows for timely response	Health system resilience indicators: an integrated package for measuring and monitoring health system resilience in countries
Health system financing	C3.1. Financing for IHR implementation	5.3. Capacity of Public Institutions	5.3.2. Funding to respond to shocks and emergencies	5.3.2.1. Domestic financing for responding to emergencies is in place and allows for timely response	International Health Regulations (2005): States Parties Self-assessment annual reporting tool, second edition.
Health system financing	C3.2. Financing for public health emergency response level 1)	5.3. Capacity of Public Institutions	5.3.2. Funding to respond to shocks and emergencies	5.3.2.1. Domestic financing for responding to emergencies is in place and allows for timely response	International Health Regulations (2005): States Parties Self-assessment annual reporting tool, second edition.
Health system financing	Current health expenditure (CHE) as a percentage of Gross Domestic Product (GDP)	5.1. Governance Revenue raising and Pooling	5.1.2. Revenue Raising	5.1.2.1 Reliable funding sources throughout the duration of the current planning cycle	Health system performance assessment: a framework for policy analysis Irene Papanicolas, Dheepa Rajan, Marina Karanikolos, Agnes Soucat, Josep Figueras
Health system financing	Domestic general government health expenditure (GGHE-D) as a percentage of gross domestic product (GDP)	5.1. Governance Revenue raising and Pooling	5.1.2. Revenue Raising	5.1.2.1 Reliable funding sources throughout the duration of the current planning cycle	Health system performance assessment: a framework for policy analysis Irene Papanicolas, Dheepa Rajan, Marina Karanikolos, Agnes Soucat, Josep Figueras
Health system financing	Domestic general government health expenditure (GGHE-D) as a percentage of current health expenditure (CHE)	5.1. Governance Revenue raising and Pooling	5.1.2. Revenue Raising	5.1.2.1 Reliable funding sources throughout the duration of the current planning cycle	Health system performance assessment: a framework for policy analysis Irene Papanicolas, Dheepa Rajan, Marina Karanikolos, Agnes Soucat, Josep Figueras
Health system financing	Domestic general government health expenditure (GGHE-D) as a percentage of general government expenditure (GGE)	5.1. Governance Revenue raising and Pooling	5.1.2. Revenue Raising	5.1.2.1 Reliable funding sources throughout the duration of the current planning cycle	Health system performance assessment: a framework for policy analysis Irene Papanicolas, Dheepa Rajan, Marina Karanikolos, Agnes Soucat, Josep Figueras
Health system financing	Health expenditure from external sources (EXT) as a percentage of current health expenditure (CHE)	5.1. Governance Revenue raising and Pooling	5.1.2. Revenue Raising	5.1.2.1 Reliable funding sources throughout the duration of the current planning cycle	Health system performance assessment: a framework for policy analysis Irene Papanicolas, Dheepa Rajan, Marina Karanikolos, Agnes Soucat, Josep Figueras
Health system financing	Domestic private health expenditure (PVT-D) as a percentage of current health expenditure (CHE)	5.1. Governance Revenue raising and Pooling	5.1.2. Revenue Raising	5.1.2.1 Reliable funding sources throughout the duration of the current planning cycle	Health system performance assessment: a framework for policy analysis Irene Papanicolas, Dheepa Rajan, Marina Karanikolos, Agnes Soucat, Josep Figueras
Health system financing	Voluntary health insurance (VHI) Prepayments as a percentage of current health expenditure (CHE)	5.2. Purcahsing access and Financial Protection	5.2.2.Financial Protection	5.2.2.1. Population covered by health insurance that ensures access to essential health services without financial hardship	Health system performance assessment: a framework for policy analysis Irene Papanicolas, Dheepa Rajan, Marina Karanikolos, Agnes Soucat, Josep Figueras
Health system financing	OOP expenditure as a total of health expenditure	5.2. Purcahsing access and Financial Protection	5.2.2.Financial Protection	5.2.2.2. Out-of-pocket health expenditures are minimized, effective fee exemptions are in place, and informal fees are eliminated to promote equitable access to healthcare	Health system performance assessment: a framework for policy analysis Irene Papanicolas, Dheepa Rajan, Marina Karanikolos, Agnes Soucat, Josep Figueras
Health system financing	Is there a set of explicitly defined benefits for the entire population	5.2. Purcahsing access and Financial Protection	5.2.1. Purchasing, providers payments and conditions of access	5.2.1.2. Entitlements to health benefits are explicitly defined, universal in nature, and ensures access to population in need	Health system performance assessment: a framework for policy analysis Irene Papanicolas, Dheepa Rajan, Marina Karanikolos, Agnes Soucat, Josep Figueras
Health system financing	To what extent are population entitlements and conditions of access defined explicitly and in easy-to-understand terms?	5.2. Purcahsing access and Financial Protection	5.2.1. Purchasing, providers payments and conditions of access	5.2.1.2. Entitlements to health benefits are explicitly defined, universal in nature, and ensures access to population in need	Health system performance assessment: a framework for policy analysis Irene Papanicolas, Dheepa Rajan, Marina Karanikolos, Agnes Soucat, Josep Figueras
Health system financing	Per person expenditure, by pool	5.1. Governance Revenue raising and Pooling	5.1.3. Pooling revenues	5.1.3.1 Effective structure and mechanisms for the equitable pooling of revenues, efficient redistribution of funds from regions or groups with lower needs to those with higher needs and integration across all health programs and funding schemes	Health system performance assessment: a framework for policy analysis Irene Papanicolas, Dheepa Rajan, Marina Karanikolos, Agnes Soucat, Josep Figueras
Health system financing	Population coverage, by pool	5.1. Governance Revenue raising and Pooling	5.1.3. Pooling revenues	5.1.3.1 Effective structure and mechanisms for the equitable pooling of revenues, efficient redistribution of funds from regions or groups with lower needs to those with higher needs and integration across all health programs and funding schemes	Health system performance assessment: a framework for policy analysis Irene Papanicolas, Dheepa Rajan, Marina Karanikolos, Agnes Soucat, Josep Figueras
Health system financing	Spending on administration, total and by pool	5.1. Governance Revenue raising and Pooling	5.1.3. Pooling revenues	5.1.3.1 Effective structure and mechanisms for the equitable pooling of revenues, efficient redistribution of funds from regions or groups with lower needs to those with higher needs and integration across all health programs and funding schemes	Health system performance assessment: a framework for policy analysis Irene Papanicolas, Dheepa Rajan, Marina Karanikolos, Agnes Soucat, Josep Figueras
Health system financing	Ratio of voluntary health insurance coverage as a percentage of the population, to voluntary health insurance expressed as a percentage of current health expenditure	5.1. Governance Revenue raising and Pooling	5.1.3. Pooling revenues	5.1.3.1 Effective structure and mechanisms for the equitable pooling of revenues, efficient redistribution of funds from regions or groups with lower needs to those with higher needs and integration across all health programs and funding schemes	Health system performance assessment: a framework for policy analysis Irene Papanicolas, Dheepa Rajan, Marina Karanikolos, Agnes Soucat, Josep Figueras
Health system financing	Pooling arrangement description	5.1. Governance Revenue raising and Pooling	5.1.3. Pooling revenues	5.1.3.1 Effective structure and mechanisms for the equitable pooling of revenues, efficient redistribution of funds from regions or groups with lower needs to those with higher needs and integration across all health programs and funding schemes	Health system performance assessment: a framework for policy analysis Irene Papanicolas, Dheepa Rajan, Marina Karanikolos, Agnes Soucat, Josep Figueras
Leadership and governance	Existence of health system resilience function within emergency management structures at all levels (ref_53)	1.1. Vision and strategic direction	1.1.2. Policies and Guidance Documents	1.1.2.1. Policies and guidelines cover all strategic priority areas	Health system resilience indicators: an integrated package for measuring and monitoring health system resilience in countries
Leadership and governance	National emergency policies and strategies define the role of health services in emergency preparedness and response, and recovery (included-responsive) (ref_54)	1.1. Vision and strategic direction	1.1.1. Explicit Vision	1.1.1.1. National strategy is based on a sound situation analysis of the context with clear and explicit goals and funding priorities	Health system resilience indicators: an integrated package for measuring and monitoring health system resilience in countries
Leadership and governance	National health sector policies and strategies define the roles of health services at all levels for public health emergencies (in level 2 plan is quality assured) (ref_55)	1.1. Vision and strategic direction	1.1.1. Explicit Vision	1.1.1.1. National strategy is based on a sound situation analysis of the context with clear and explicit goals and funding priorities	Health system resilience indicators: an integrated package for measuring and monitoring health system resilience in countries
Leadership and governance	Annual operational health sector plan includes emergency preparedness activities (in level 2 plan is quality assured) (ref_56)	1.1. Vision and strategic direction	1.1.2. Policies and Guidance Documents	1.1.2.1. Policies and guidelines cover all strategic priority areas	Health system resilience indicators: an integrated package for measuring and monitoring health system resilience in countries
Leadership and governance	Availability of a designated entity or structure for health system resilience function (not aligned to HSPA-PLUS, not included) (ref_57)	1.1. Vision and strategic direction	1.1.2. Policies and Guidance Documents	1.1.2.1. Policies and guidelines cover all strategic priority areas	Health system resilience indicators: an integrated package for measuring and monitoring health system resilience in countries
Leadership and governance	Existence of a national entity or structure that is responsible for the coordination of the essential public health functions (EPHFs) in an integrated manner (duplicative with 55) (ref_59)	1.1. Vision and strategic direction	1.1.1. Explicit Vision	1.1.1.1. National strategy is based on a sound situation analysis of the context with clear and explicit goals and funding priorities	Health system resilience indicators: an integrated package for measuring and monitoring health system resilience in countries
Leadership and governance	Availability of national and subnational guidance (or equivalent) on health system recovery planning and actions (ref_62)	1.1. Vision and strategic direction	1.1.1. Explicit Vision	1.1.1.1. National strategy is based on a sound situation analysis of the context with clear and explicit goals and funding priorities	Health system resilience indicators: an integrated package for measuring and monitoring health system resilience in countries
Leadership and governance	Existence of a designated entity or structure with the responsibility for recovery process following a public health event (ref_63)	1.1. Vision and strategic direction	1.1.1. Explicit Vision	1.1.1.1. National strategy is based on a sound situation analysis of the context with clear and explicit goals and funding priorities	Health system resilience indicators: an integrated package for measuring and monitoring health system resilience in countries
Leadership and governance	Availability of national guideline on equity and ethics for delivery of routine and emergency-related health services in the context of public health emergencies (to be considered) (ref_58)	1.3. oversight and participation	1.3.1. The Right to Health	1.3.1.1. The government has adopted legislations that safeguard the Right to Health, including provisions for access to healthcare services, non-discrimination, and the provision of essential medicines to all .	Health system resilience indicators: an integrated package for measuring and monitoring health system resilience in countries
Leadership and governance	National or subnational system in place for conducting simulation exercises that meets criteria (ref_41)	1.1. Vision and strategic direction	1.1.2. Policies and Guidance Documents	1.1.2.1. Policies and guidelines cover all strategic priority areas	Health system resilience indicators: an integrated package for measuring and monitoring health system resilience in countries
Leadership and governance	Mechanisms in place to support the systematic capture and translation of lessons identified from public health shocks, incidents and events (duplicative) (ref_52)	1.1. Vision and strategic direction	1.1.1. Explicit Vision	1.1.1.1. National strategy is based on a sound situation analysis of the context with clear and explicit goals and funding priorities	Health system resilience indicators: an integrated package for measuring and monitoring health system resilience in countries
Leadership and governance	RCCE system for emergencies (ref_C.10.1)	1.3. oversight and participation	1.3.3. Participation of Service Users in Decision-Making	1.3.3.1. Community Groups (e.g., patient associations) participate in health-related decision-making at the national and subnational Levels	International Health Regulations (2005): States Parties Self-assessment annual reporting tool, second edition.
Leadership and governance	Risk communication (ref_C10.2)	1.3. oversight and participation	1.3.3. Participation of Service Users in Decision-Making	1.3.3.1. Community Groups (e.g., patient associations) participate in health-related decision-making at the national and subnational Levels	International Health Regulations (2005): States Parties Self-assessment annual reporting tool, second edition.
Leadership and governance	Community engagement (ref_C.10.3)	1.3. oversight and participation	1.3.3. Participation of Service Users in Decision-Making	1.3.3.1. Community Groups (e.g., patient associations) participate in health-related decision-making at the national and subnational Levels	International Health Regulations (2005): States Parties Self-assessment annual reporting tool, second edition.
Leadership and governance	Implementation of a Health in All Policies (HiAP) approach (included) (ref_61)	1.2. Implementation and Management	1.2.3. Intersectoral Collaboration for Health	1.2.3.1 Relevant multisectoral policies and legislation are fully implemented at both national and subnational levels and funding from other sectors is allocated to health	Health system resilience indicators: an integrated package for measuring and monitoring health system resilience in countries
Leadership and governance	Existence of an all-hazard emergency preparedness and response plan (or equivalent) which defines the role of health services (including primary care) in emergency management and the maintenance of essential health services (included in level-2) (ref_43)	1.2. Implementation and Management	1.2.3. Intersectoral Collaboration for Health	1.2.3.1 Relevant multisectoral policies and legislation are fully implemented at both national and subnational levels and funding from other sectors is allocated to health	Health system resilience indicators: an integrated package for measuring and monitoring health system resilience in countries
Leadership and governance	Mechanism to ensure community voices informing planning and organization of services at the local level (included) (ref_49)	1.3. oversight and participation	1.3.3. Participation of Service Users in Decision-Making	1.3.3.1. Community Groups (e.g., patient associations) participate in health-related decision-making at the national and subnational Levels	Health system resilience indicators: an integrated package for measuring and monitoring health system resilience in countries
Leadership and governance	Availability of a designated health system focal point responsible for health services provision assessment process in IHR monitoring and evaluation (duplicative with 55) (ref_60)	1.4. Accountability	1.4.2. Accountability to Citizens	1.4.2.1.The mechanisms for vertical financial and performance accountability at national and subnational Levels are fully operational, with regular reports published.	Health system resilience indicators: an integrated package for measuring and monitoring health system resilience in countries
Leadership and governance	Service package for essential health services and public health functions is developed and meets criteria (ref_38)	1.1. Vision and strategic direction	1.1.2. Policies and Guidance Documents	1.1.2.1. Policies and guidelines cover all strategic priority areas	Health system resilience indicators: an integrated package for measuring and monitoring health system resilience in countries
Leadership and governance	Availability of a protocol or guidance for prioritization of health services to be maintained following health systems shocks or stressors (ref_39)	1.1. Vision and strategic direction	1.1.2. Policies and Guidance Documents	1.1.2.1. Policies and guidelines cover all strategic priority areas	Health system resilience indicators: an integrated package for measuring and monitoring health system resilience in countries
Leadership and governance	Availability of clinical protocols for case management of common and high priority infectious diseases and hazards (ref_40)	1.1. Vision and strategic direction	1.1.2. Policies and Guidance Documents	1.1.2.1. Policies and guidelines cover all strategic priority areas	Health system resilience indicators: an integrated package for measuring and monitoring health system resilience in countries
Leadership and governance	Percentage of health facilities that have emergency management plans incorporating consideration of health services continuity (ref_44)	1.4. Accountability	1.4.1. Accountability within Government	1.4.1.2. Government-led performance accountability mechanisms are fully operational, with regularly published reports	Health system resilience indicators: an integrated package for measuring and monitoring health system resilience in countries
Leadership and governance	Percentage of facilities that have plans or service delivery models that take essential services to hard-to-reach populations (ref_45)	1.4. Accountability	1.4.2. Accountability to Citizens	1.4.2.1.The mechanisms for vertical financial and performance accountability at national and subnational Levels are fully operational, with regular reports published.	Health system resilience indicators: an integrated package for measuring and monitoring health system resilience in countries
Leadership and governance	Percentage of health facilities that are a part of a collaborative network or mutual aid arrangements for managing public health challenges and maintaining routine functions (ref_42)	1.4. Accountability	1.4.1. Accountability within Government	1.4.1.2. Government-led performance accountability mechanisms are fully operational, with regularly published reports	Health system resilience indicators: an integrated package for measuring and monitoring health system resilience in countries
Leadership and governance	Existence of a standard, guideline, specification or equivalent that defines infrastructural standards for health facilities (ref_46)	1.1. Vision and strategic direction	1.1.2. Policies and Guidance Documents	1.1.2.1. Policies and guidelines cover all strategic priority areas	Health system resilience indicators: an integrated package for measuring and monitoring health system resilience in countries
Leadership and governance	Percentage of health facilities that meet standards for infrastructure (ref_47)	1.3. oversight and participation	1.3.1. The Right to Health	1.3.1.2 The right to health is realized and monitored through various national mechanisms	Health system resilience indicators: an integrated package for measuring and monitoring health system resilience in countries
Leadership and governance	A national coordination mechanism for multistakeholder participation and community engagement with a focus on public health exists (ref-48)	1.3. oversight and participation	1.3.3. Participation of Service Users in Decision-Making	1.3.3.1. Community Groups (e.g., patient associations) participate in health-related decision-making at the national and subnational Levels	Health system resilience indicators: an integrated package for measuring and monitoring health system resilience in countries
Leadership and governance	Mechanism to ensure community voices informing planning and organization of services at the local level (ref_49)	1.3. oversight and participation	1.3.3. Participation of Service Users in Decision-Making	1.3.3.1. Community Groups (e.g., patient associations) participate in health-related decision-making at the national and subnational Levels	Health system resilience indicators: an integrated package for measuring and monitoring health system resilience in countries
Leadership and governance	Percentage of facilities that have standard operating procedures (SOPs) for ensuring essential supplies (ref_50)	1.3. oversight and participation	1.3.2. Decentralization	1.3.2.2. Subnational authorities have power over medical products management	Health system resilience indicators: an integrated package for measuring and monitoring health system resilience in countries
Leadership and governance	Percentage of facilities that have standard operating procedures (SOPs) to enable health facility staff to repurpose resources (ref_51)	1.3. oversight and participation	1.3.2. Decentralization	1.3.2.1. Subnational authorities have power over budget allocation	Health system resilience indicators: an integrated package for measuring and monitoring health system resilience in countries
Leadership and governance	Policy, legal and normative instruments for IHR implementation (ref_C1.1. )	1.3. oversight and participation	1.3.1. The Right to Health	1.3.1.1. The government has adopted legislations that safeguard the Right to Health, including provisions for access to healthcare services, non-discrimination, and the provision of essential medicines to all .	International Health Regulations (2005): States Parties Self-assessment annual reporting tool, second edition.
Leadership and governance	Gender Equality in health emergencies (ref_C1.2. )-Systematic gender analysis of IHR capacities is conducted	1.3. oversight and participation	1.3.1. The Right to Health	1.3.1.2 The right to health is realized and monitored through various national mechanisms	International Health Regulations (2005): States Parties Self-assessment annual reporting tool, second edition.
Leadership and governance	Multisectoral coordination mechanisms (ref_C2.2. )	1.2. Implementation and Management	1.2.3. Intersectoral Collaboration for Health	1.2.3.1 Relevant multisectoral policies and legislation are fully implemented at both national and subnational levels and funding from other sectors is allocated to health	International Health Regulations (2005): States Parties Self-assessment annual reporting tool, second edition.
Leadership and governance	Advocacy for IHR implementation (ref_C2.3.)	1.3. oversight and participation	1.3.1. The Right to Health	1.3.1.2 The right to health is realized and monitored through various national mechanisms	International Health Regulations (2005): States Parties Self-assessment annual reporting tool, second edition.
Leadership and governance	G1.1. Whether a strategic vision exists in written and traceable form (through documents, directives, regulations, guidelines, etc.) (ref_4.4.2.1)	1.3. oversight and participation	1.3.1. The Right to Health	1.3.1.1. The government has adopted legislations that safeguard the Right to Health, including provisions for access to healthcare services, non-discrimination, and the provision of essential medicines to all .	Health system performance assessment: a framework for policy analysis Irene Papanicolas, Dheepa Rajan, Marina Karanikolos, Agnes Soucat, Josep Figueras
Leadership and governance	G1.2. Whether the strategic vision is of good quality viewed in terms of implementability	1.1. Vision and strategic direction	1.1.1. Explicit Vision	1.1.1.1. National strategy is based on a sound situation analysis of the context with clear and explicit goals and funding priorities	Health system performance assessment: a framework for policy analysis Irene Papanicolas, Dheepa Rajan, Marina Karanikolos, Agnes Soucat, Josep Figueras
Leadership and governance	Does the NHPSP clearly mention indicators allowing for regular monitoring and evaluation of the sector? (2) (ref_4.4.2.2)	1.1. Vision and strategic direction	1.1.1. Explicit Vision	1.1.1.1. National strategy is based on a sound situation analysis of the context with clear and explicit goals and funding priorities	Health system performance assessment: a framework for policy analysis Irene Papanicolas, Dheepa Rajan, Marina Karanikolos, Agnes Soucat, Josep Figueras
Leadership and governance	G2.1. whether national health policies, strategies, plans, guidelines, or laws are developed with the broad participation of key stakeholders. (ref_4.4.3.1)	1.1. Vision and strategic direction	1.1.1. Explicit Vision	1.1.1.1. National strategy is based on a sound situation analysis of the context with clear and explicit goals and funding priorities	Health system performance assessment: a framework for policy analysis Irene Papanicolas, Dheepa Rajan, Marina Karanikolos, Agnes Soucat, Josep Figueras
[truncated: 45 more rows]
